# Supplementary material for: Homologous Mutation to Human BRAF V600E Is Common in Naturally Occurring Canine Bladder Cancer—Evidence for a Relevant Model System and Urine-Based Diagnostic Test
Source: Oxford University Press journal article supplement (doi:10.1158/1541-7786.mcr-14-0689), 2015-03-12
Supplement: 15417786mcr140689-sup-142595_1_supp_2854021_njfb9n.xlsx [file 15417786mcr140689-sup-142595_1_supp_2854021_njfb9n.xlsx]

## Sheet: Sheet1
Supplemental Table 1. Excel spreadsheet containing all pass-filter somatic mutations from the four InvTCC tumors that were not found in normal tissue.
Chromosome	Position	REF	ALT	Quality	Variant Allele	Gene Symbol	Consequence	Enbembl Gene	Ensembl Transcript	cDNA position	CDS position	Protein position	Amino Acid	Codon	DISTANCE	SIFT score	SCOT1	SCOT1 Quality	SCOT2	SCOT2 Quality	WHWT	WHWT Quality	SHSD	SHSD Quality
1	274776	T	C	358.85	C		synonymous_variant	ENSCAFG00000030108	ENSCAFT00000043967	333	333	111	N	aaT/aaC			./.	7	0/1	99	0/0	99	0/0	99
1	274776				C	ENPP1	intron_variant	ENSCAFG00000000001	ENSCAFT00000000001
1	274924	A	C	42.94	C		missense_variant	ENSCAFG00000030108	ENSCAFT00000043967	481	481	161	K/Q	Aaa/Caa		deleterious(0)	0/0	15	0/0	99	0/1	75	0/0	42
1	274924				C	ENPP1	intron_variant	ENSCAFG00000000001	ENSCAFT00000000001
1	275026	C	G	84.86	G		missense_variant	ENSCAFG00000030108	ENSCAFT00000043967	583	583	195	Q/E	Cag/Gag		tolerated(0.07)	0/1	16	0/0	99	0/0	60	0/1	99
1	275026				G	ENPP1	intron_variant	ENSCAFG00000000001	ENSCAFT00000000001
1	275148	G	T	126.37	T		synonymous_variant	ENSCAFG00000030108	ENSCAFT00000043967	705	705	235	T	acG/acT			0/1	45	0/0	67	0/1	99	./.	4
1	275148				T	ENPP1	intron_variant	ENSCAFG00000000001	ENSCAFT00000000001
1	321956	T	C	379.27	C	ENPP1	synonymous_variant	ENSCAFG00000000001	ENSCAFT00000000001	225	108	36	A	gcA/gcG			./.	.	1/1	24	./.	9	0/0	42
1	13724310	A	G	4805.74	G	KDSR	3_prime_UTR_variant	ENSCAFG00000000067	ENSCAFT00000000117	2095							0/0	99	0/0	99	1/1	99	0/0	99
1	13724551	A	G	5672.74	G	KDSR	3_prime_UTR_variant	ENSCAFG00000000067	ENSCAFT00000000117	2336							0/0	99	0/0	99	1/1	99	0/0	99
1	13725145	C	T	3761.74	T	KDSR	3_prime_UTR_variant	ENSCAFG00000000067	ENSCAFT00000000117	2930							0/0	99	0/0	99	1/1	99	0/0	99
1	13725473	T	C	4265.74	C	KDSR	3_prime_UTR_variant	ENSCAFG00000000067	ENSCAFT00000000117	3258							0/0	99	0/0	99	1/1	99	0/0	99
1	13725705	C	G	2863.74	G	KDSR	3_prime_UTR_variant	ENSCAFG00000000067	ENSCAFT00000000117	3490							0/0	99	0/0	99	1/1	99	0/0	99
1	13725928	G	A	3399.74	A	KDSR	3_prime_UTR_variant	ENSCAFG00000000067	ENSCAFT00000000117	3713							0/0	99	0/0	99	1/1	99	0/0	99
1	17354968	C	G	62.15	G	MALT1	synonymous_variant	ENSCAFG00000000105	ENSCAFT00000000166	2241	2241	747	V	gtG/gtC			0/1	95	0/0	99	0/0	99	0/0	69
1	22494744	G	C	612.15	C	DCC	missense_variant	ENSCAFG00000000157	ENSCAFT00000000254	115	115	39	R/G	Cga/Gga		tolerated(0.38)	0/1	99	0/0	99	0/0	99	0/0	99
1	25037045	T	A	32.68	A	MOXD1	missense_variant	ENSCAFG00000000184	ENSCAFT00000000292	389	323	108	L/Q	cTg/cAg		deleterious(0)	0/1	64	./.	3	0/0	24	./.	3
1	25225246	T	G	194.4	G		non_coding_exon_variant	ENSCAFG00000000183	ENSCAFT00000000291	230							0/1	33	1/1	15	./.	.	./.	.
1	29645552	A	C	8200.74	C	IFNGR1	3_prime_UTR_variant	ENSCAFG00000000260	ENSCAFT00000000413	3578							0/0	99	0/0	99	0/0	99	1/1	99
1	29646012	C	T	732.15	T	IFNGR1	3_prime_UTR_variant	ENSCAFG00000000260	ENSCAFT00000000413	3118							0/0	99	0/0	99	0/1	99	0/0	99
1	30623788	C	G	866.15	G	KIAA1244	synonymous_variant	ENSCAFG00000000272	ENSCAFT00000044681	3990	3903	1301	P	ccC/ccG			0/0	99	0/0	99	0/0	99	0/1	99
1	30623788				G	KIAA1244	synonymous_variant	ENSCAFG00000000272	ENSCAFT00000000423	3903	3903	1301	P	ccC/ccG
1	31044250	G	T	447.15	T	CCDC28A	missense_variant	ENSCAFG00000000277	ENSCAFT00000000433	125	125	42	R/L	cGc/cTc		tolerated(0.14)	0/0	78	0/0	36	0/1	99	0/0	66
1	34375750	T	A	911.15	A	HIVEP2	missense_variant	ENSCAFG00000000300	ENSCAFT00000000460	6242	6242	2081	K/M	aAg/aTg		deleterious(0.01)	0/0	99	0/1	99	0/0	99	0/0	54
1	34375908	G	A	547.15	A	HIVEP2	synonymous_variant	ENSCAFG00000000300	ENSCAFT00000000460	6084	6084	2028	F	ttC/ttT			0/0	99	0/1	99	0/0	99	0/0	39
1	35038615	C	G	1820.15	G	FUCA2	missense_variant	ENSCAFG00000000309	ENSCAFT00000000476	250	250	84	D/H	Gat/Cat		deleterious(0)	0/0	99	0/0	99	0/1	99	0/0	99
1	36164717	G	A	3339.15	A	UTRN	missense_variant	ENSCAFG00000000326	ENSCAFT00000044228	9161	8776	2926	V/I	Gtc/Atc		deleterious(0.02)	0/0	99	0/0	99	0/1	99	0/0	99
1	36164717				A	UTRN	missense_variant	ENSCAFG00000000326	ENSCAFT00000000501	8776	442	148	V/I	Gtc/Atc		tolerated(0.24)
1	36164717				A	UTRN	missense_variant	ENSCAFG00000000326	ENSCAFT00000047082	1348	1348	450	V/I	Gtc/Atc		tolerated(0.21)
1	40377524	C	G	70.29	G	GINM1	3_prime_UTR_variant	ENSCAFG00000032487	ENSCAFT00000046676	4552							0/1	33	0/1	66	./.	3	./.	3
1	40377524				G	LATS1	intron_variant	ENSCAFG00000000387	ENSCAFT00000000614
1	40377524				G	KATNA1	intron_variant	ENSCAFG00000000385	ENSCAFT00000000603
1	40377550	T	C	50.46	C	GINM1	3_prime_UTR_variant	ENSCAFG00000032487	ENSCAFT00000046676	4578							./.	12	0/1	58	./.	9	0/1	27
1	40377550				C	LATS1	intron_variant	ENSCAFG00000000387	ENSCAFT00000000614
1	40377550				C	KATNA1	intron_variant	ENSCAFG00000000385	ENSCAFT00000000603
1	40377592	A	G	79.22	G	GINM1	3_prime_UTR_variant	ENSCAFG00000032487	ENSCAFT00000046676	4620							0/0	18	0/1	79	0/0	15	0/1	36
1	40377592				G	LATS1	intron_variant	ENSCAFG00000000387	ENSCAFT00000000614
1	40377592				G	KATNA1	intron_variant	ENSCAFG00000000385	ENSCAFT00000000603
1	40457286	T	C	778.15	C	LATS1	missense_variant	ENSCAFG00000000387	ENSCAFT00000044921	405	175	59	T/A	Acc/Gcc		tolerated(1)	0/0	81	0/0	99	0/0	99	0/1	99
1	40457286				C	LATS1	missense_variant	ENSCAFG00000000387	ENSCAFT00000000614	324	175	59	T/A	Acc/Gcc		tolerated(1)
1	47952283	A	G	345.15	G	TULP4	downstream_gene_variant	ENSCAFG00000000652	ENSCAFT00000001007						859		0/0	99	0/0	99	0/0	99	0/1	99
1	47952283				G	TULP4	3_prime_UTR_variant	ENSCAFG00000000652	ENSCAFT00000049968	5503
1	48045249	G	A	714.15	A	TMEM181	synonymous_variant	ENSCAFG00000000655	ENSCAFT00000001010	1140	1140	380	V	gtG/gtA			0/0	99	0/0	99	0/0	99	0/1	99
1	48045249				A	TMEM181	synonymous_variant	ENSCAFG00000000655	ENSCAFT00000045261	1619	870	290	V	gtG/gtA
1	49015186	G	A	3124.15	A	ACAT2	missense_variant	ENSCAFG00000000720	ENSCAFT00000001128	271	271	91	A/T	Gcc/Acc		tolerated(0.25)	0/0	99	0/0	99	0/0	99	0/1	99
1	54800882	G	A	4137.01	A		downstream_gene_variant	ENSCAFG00000000842	ENSCAFT00000001318						84		1/1	99	0/1	99	0/1	99	0/0	99
1	54800882				A		3_prime_UTR_variant	ENSCAFG00000000842	ENSCAFT00000045697	1306
1	55517691	A	T	1195.15	T	MLLT4	missense_variant	ENSCAFG00000000860	ENSCAFT00000001341	4679	4679	1560	Q/L	cAg/cTg		deleterious(0.02)	0/0	99	0/1	99	0/0	99	0/0	99
1	55517691				T	MLLT4	missense_variant	ENSCAFG00000000860	ENSCAFT00000047722	4655	4634	1545	Q/L	cAg/cTg		deleterious(0.02)
1	56416010	C	T	381.57	T	THBS2	missense_variant	ENSCAFG00000000874	ENSCAFT00000046608	1105	1105	369	E/K	Gag/Aag		deleterious(0.01)	0/1	99	0/1	99	0/1	26	0/0	21
1	56416010				T	THBS2	missense_variant	ENSCAFG00000000874	ENSCAFT00000001365	1144	1144	382	E/K	Gag/Aag		deleterious(0.01)
1	56866557	G	A	1380.76	A	DSE	missense_variant	ENSCAFG00000000886	ENSCAFT00000001378	2495	2294	765	R/H	cGc/cAc		tolerated(0.13)	0/1	99	0/1	99	0/0	99	0/0	39
1	56933600	C	A	31.46	A	FAM26E	3_prime_UTR_variant	ENSCAFG00000000889	ENSCAFT00000001381	1076							0/1	64	0/0	21	./.	9	./.	12
1	56933600				A	TRAPPC3L	intron_variant	ENSCAFG00000032020	ENSCAFT00000047910
1	57767862	T	C	6010.74	C	DCBLD1	missense_variant	ENSCAFG00000000925	ENSCAFT00000001430	1151	739	247	S/P	Tcc/Ccc		tolerated(0.21)	0/0	99	0/0	99	1/1	99	0/0	99
1	64760268	A	G	192.41	G	NCOA7	missense_variant	ENSCAFG00000001047	ENSCAFT00000001606	545	482	161	N/S	aAc/aGc		tolerated(0.39)	./.	9	0/0	15	0/0	24	0/1	93
1	68063528	G	A	458.78	A	LAMA2	missense_variant	ENSCAFG00000001106	ENSCAFT00000036090	8038	8038	2680	E/K	Gag/Aag		tolerated(0.55)	0/0	51	0/0	36	1/1	39	0/0	18
1	68063528				A	LAMA2	missense_variant	ENSCAFG00000001106	ENSCAFT00000001697	8628	8110	2704	E/K	Gag/Aag		tolerated(0.54)
1	68569327	C	T	337.45	T	L3MBTL3	missense_variant	ENSCAFG00000001115	ENSCAFT00000001708	285	203	68	T/M	aCg/aTg		deleterious(0.04)	0/0	48	0/0	57	1/1	30	0/0	36
1	70205539	C	T	698.15	T	AAED1	missense_variant	ENSCAFG00000001198	ENSCAFT00000001851	472	472	158	R/W	Cgg/Tgg		tolerated(0.07)	0/0	99	0/1	99	0/0	99	0/0	99
1	73761958	G	A	196.39	A	NAA35	missense_variant	ENSCAFG00000001344	ENSCAFT00000002087	97	97	33	R/W	Cgg/Tgg			./.	3	./.	6	1/1	18	0/0	18
1	73794360	A	G	715.92	G		synonymous_variant	ENSCAFG00000001352	ENSCAFT00000002094	93	93	31	A	gcT/gcC			0/0	90	0/0	99	./.	6	0/1	99
1	73794439	G	C	158.76	C		missense_variant	ENSCAFG00000001352	ENSCAFT00000002094	14	14	5	A/G	gCc/gGc		tolerated(0.23)	0/0	36	0/0	69	0/1	29	0/1	91
1	75507627	A	G	990.15	G	cfa-mir-7-1	upstream_gene_variant	ENSCAFG00000020591	ENSCAFT00000032698						2116		0/1	99	0/0	99	0/0	99	0/0	99
1	75507627				G	HNRNPK	missense_variant	ENSCAFG00000001399	ENSCAFT00000002165	605	605	202	D/G	gAt/gGt		deleterious(0.01)
1	75507627				G	HNRNPK	missense_variant	ENSCAFG00000001399	ENSCAFT00000047704	1067	485	162	D/G	gAt/gGt		deleterious(0.02)
1	81178295	G	C	1332.78	C	GNA14	3_prime_UTR_variant	ENSCAFG00000031429	ENSCAFT00000047596	1868							0/1	31	1/1	64	./.	12	0/0	24
1	81276539	A	G	1714.52	G	VPS13A	missense_variant	ENSCAFG00000001617	ENSCAFT00000048812	6307	5627	1876	I/T	aTc/aCc		deleterious(0)	0/1	99	1/1	99	0/0	99	0/0	99
1	81276539				G	VPS13A	missense_variant	ENSCAFG00000001617	ENSCAFT00000002558	5432	5432	1811	I/T	aTc/aCc		deleterious(0)
1	87194945	A	T	1388.15	T	SMC5	downstream_gene_variant	ENSCAFG00000001880	ENSCAFT00000002987						13		0/1	99	0/0	99	0/0	99	0/0	99
1	87194945				T	SMC5	3_prime_UTR_variant	ENSCAFG00000001880	ENSCAFT00000042950	3325
1	88126697	T	C	2779.15	C	TJP2	3_prime_UTR_variant	ENSCAFG00000001902	ENSCAFT00000048763	4169							0/0	99	0/1	99	0/0	99	0/0	99
1	88126697				C	TJP2	3_prime_UTR_variant	ENSCAFG00000001902	ENSCAFT00000003012	3841
1	88126697				C	TJP2	3_prime_UTR_variant	ENSCAFG00000001902	ENSCAFT00000046860	3794
1	92977986	C	T	821.05	T	SLC1A1	3_prime_UTR_variant	ENSCAFG00000002067	ENSCAFT00000003278	3220							./.	9	0/0	78	1/1	63	0/0	99
1	93204136	T	C	74.12	C	RCL1	3_prime_UTR_variant	ENSCAFG00000002091	ENSCAFT00000003309	1893							./.	9	0/1	24	0/1	87	0/0	96
1	93864516	C	G	726.15	G	ERMP1	missense_variant	ENSCAFG00000002131	ENSCAFT00000003361	1454	1454	485	C/S	tGt/tCt		tolerated(0.54)	0/1	99	0/0	99	0/0	99	0/0	99
1	95280141	A	G	329.36	G	ROR2	downstream_gene_variant	ENSCAFG00000002163	ENSCAFT00000003401						198		0/0	24	0/1	37	./.	12	./.	12
1	95280141				G	ROR2	3_prime_UTR_variant	ENSCAFG00000002163	ENSCAFT00000043576	2436
1	96863487	C	T	944.76	T	SEMA4D	synonymous_variant	ENSCAFG00000002180	ENSCAFT00000003433	1746	1746	582	F	ttC/ttT			0/1	99	0/1	99	0/0	45	0/0	99
1	96868494	C	T	3746.76	T	SEMA4D	synonymous_variant	ENSCAFG00000002180	ENSCAFT00000003433	2766	2766	922	Y	taC/taT			0/1	99	0/1	99	0/0	99	0/0	99
1	96881161	A	G	1451.15	G	SECISBP2	synonymous_variant	ENSCAFG00000002188	ENSCAFT00000047247	2903	2271	757	N	aaT/aaC			0/0	99	0/0	99	0/1	99	0/0	99
1	96881161				G	SECISBP2	synonymous_variant	ENSCAFG00000002188	ENSCAFT00000003443	2331	2331	777	N	aaT/aaC
1	97809606	G	A	160.17	A		3_prime_UTR_variant	ENSCAFG00000002224	ENSCAFT00000043220	3438							0/0	21	0/0	39	0/1	99	0/0	27
1	98188269	C	T	53.25	T	PHF2	downstream_gene_variant	ENSCAFG00000002253	ENSCAFT00000003538						1557		0/0	36	./.	12	0/0	36	0/1	86
1	98188269				T	PHF2	3_prime_UTR_variant	ENSCAFG00000002253	ENSCAFT00000048688	5434
1	98487405	G	T	73.48	T	WNK2	synonymous_variant	ENSCAFG00000002266	ENSCAFT00000042749	1449	1096	366	R	Cgg/Agg			./.	6	./.	12	0/0	33	0/1	99
1	98487405				T	WNK2	synonymous_variant	ENSCAFG00000002266	ENSCAFT00000003560	4181	3517	1173	R	Cgg/Agg
1	99024997	G	A	2270.52	A	NOL8	missense_variant	ENSCAFG00000002324	ENSCAFT00000003644	367	367	123	V/M	Gtg/Atg		tolerated(0.05)	1/1	99	0/1	99	0/0	99	0/0	99
1	99077788	A	G	2190.15	G	IARS	synonymous_variant	ENSCAFG00000002340	ENSCAFT00000003663	1087	1077	359	T	acA/acG			0/0	99	0/0	99	0/0	99	0/1	99
1	99445085	G	A	996.15	A	ZNF446	missense_variant	ENSCAFG00000031873	ENSCAFT00000043252	580	580	194	R/W	Cgg/Tgg		deleterious(0.05)	0/0	78	0/0	99	0/0	99	0/1	99
1	99643232	C	T	178.15	T	ZNF8	3_prime_UTR_variant	ENSCAFG00000002372	ENSCAFT00000048797	3729							0/0	39	0/0	51	0/1	87	0/0	39
1	99643232				T	ZNF8	downstream_gene_variant	ENSCAFG00000002372	ENSCAFT00000045181						1879
1	99785103	T	A	55.7	A		non_coding_exon_variant	ENSCAFG00000002375	ENSCAFT00000003728	326							./.	3	0/1	30	./.	6	0/1	19
1	99785103				A	U4	downstream_gene_variant	ENSCAFG00000028331	ENSCAFT00000042614						828
1	99785103				A	ZNF8	intron_variant	ENSCAFG00000002372	ENSCAFT00000045181
1	100378036	G	A	684.16	A	ZNF211	missense_variant	ENSCAFG00000028864	ENSCAFT00000043443	1052	1052	351	R/K	aGa/aAa		tolerated(0.19)	0/0	21	0/1	99	0/0	54	0/0	87
1	100461847	C	T	774.76	T	ZNF154	missense_variant	ENSCAFG00000002412	ENSCAFT00000003792	1359	1189	397	E/K	Gag/Aag		deleterious(0.04)	0/1	99	0/1	99	0/0	54	0/0	99
1	100563441	A	C	141.58	C	ZNF549	3_prime_UTR_variant	ENSCAFG00000032253	ENSCAFT00000047973	3785							./.	.	0/1	64	0/1	32	./.	6
1	100616809	C	G	108.26	G		3_prime_UTR_variant	ENSCAFG00000031784	ENSCAFT00000048333	5258							./.	3	0/0	15	0/1	99	./.	6
1	101456594	C	A	119.15	A	ZFP28	missense_variant	ENSCAFG00000024289	ENSCAFT00000048798	2439	2439	813	K/N	aaG/aaT		tolerated(1)	0/0	33	0/1	99	0/0	51	0/0	48
1	101456594				A	ZFP28	missense_variant	ENSCAFG00000024289	ENSCAFT00000011556	2268	2268	756	K/N	aaG/aaT		tolerated(1)
1	101548667	G	A	47.91	A	ZNF582	3_prime_UTR_variant	ENSCAFG00000029312	ENSCAFT00000045011	3889							0/0	25	0/0	99	0/0	74	0/1	80
1	101606275	A	G	1098.52	G	ZNF667	synonymous_variant	ENSCAFG00000002479	ENSCAFT00000003913	1283	1224	408	H	caT/caC			1/1	54	0/1	99	0/0	39	0/0	42
1	102141028	C	T	2020.74	T	ZNF579	3_prime_UTR_variant	ENSCAFG00000002561	ENSCAFT00000048613	1991							0/0	99	0/0	99	1/1	99	0/0	99
1	102141028				T	ZNF579	intron_variant	ENSCAFG00000002561	ENSCAFT00000004042
1	102364447	G	A	35.38	A	U4	upstream_gene_variant	ENSCAFG00000027099	ENSCAFT00000041382						964		0/0	24	./.	6	0/1	65	./.	.
1	102364447				A	BRSK1	3_prime_UTR_variant	ENSCAFG00000002601	ENSCAFT00000004095	5782
1	102364447				A	TMEM150B	intron_variant	ENSCAFG00000002595	ENSCAFT00000004083
1	102366886	C	T	1828.11	T	U4	downstream_gene_variant	ENSCAFG00000027099	ENSCAFT00000041382						1325		1/1	99	0/1	99	0/0	33	0/1	17
1	102366886				T	BRSK1	3_prime_UTR_variant	ENSCAFG00000002601	ENSCAFT00000004095	3343
1	102366886				T	TMEM150B	synonymous_variant	ENSCAFG00000002595	ENSCAFT00000004083	632	624	208	D	gaC/gaT
1	102524916	G	A	2700.15	A	EPS8L1	synonymous_variant	ENSCAFG00000002628	ENSCAFT00000004134	840	387	129	R	cgC/cgT			0/0	99	0/1	99	0/0	99	0/0	99
1	103062328	A	G	264.15	G	CNOT3	synonymous_variant	ENSCAFG00000002699	ENSCAFT00000004262	1812	1206	402	G	ggT/ggC			0/0	69	0/0	99	0/1	99	0/0	99
1	103062328				G	LENG1	downstream_gene_variant	ENSCAFG00000002697	ENSCAFT00000004259						4907
1	103371985	C	T	203.17	T		upstream_gene_variant	ENSCAFG00000032019	ENSCAFT00000046725						2887		0/1	29	./.	3	1/1	15	./.	.
1	103371985				T		synonymous_variant	ENSCAFG00000002723	ENSCAFT00000004310	49	49	17	L	Ctg/Ttg
1	105460363	C	T	275.17	T		synonymous_variant	ENSCAFG00000023981	ENSCAFT00000037143	573	573	191	T	acC/acT			0/0	75	0/0	27	0/1	99	0/0	21
1	105460363				T		upstream_gene_variant	ENSCAFG00000032162	ENSCAFT00000044724						841
1	105460363				T		upstream_gene_variant	ENSCAFG00000002823	ENSCAFT00000004513						841
1	106679728	A	G	2005.15	G	TBC1D17	missense_variant	ENSCAFG00000003462	ENSCAFT00000005586	700	700	234	F/L	Ttc/Ctc		tolerated(0.38)	0/0	99	0/0	99	0/1	99	0/0	99
1	106679728				G	TBC1D17	missense_variant	ENSCAFG00000003462	ENSCAFT00000046072	700	700	234	F/L	Ttc/Ctc		tolerated(0.41)
1	106990353	C	T	479.15	T	FCGRT	synonymous_variant	ENSCAFG00000003625	ENSCAFT00000005836	399	54	18	L	ctG/ctA			0/1	99	0/0	99	0/0	87	0/0	99
1	107454670	G	A	5853.76	A	NUCB1	3_prime_UTR_variant	ENSCAFG00000003874	ENSCAFT00000006233	1727							0/1	99	0/1	99	0/0	99	0/0	99
1	107617401	C	G	1452.15	G	FUT2	synonymous_variant	ENSCAFG00000032038	ENSCAFT00000045295	924	924	308	L	ctG/ctC			0/1	99	0/0	99	0/0	99	0/0	99
1	107617401				G	RASIP1	intron_variant	ENSCAFG00000003910	ENSCAFT00000042904
1	107617401				G	BCAT2	intron_variant	ENSCAFG00000003901	ENSCAFT00000006272
1	107809056	G	A	39.3	A		synonymous_variant	ENSCAFG00000004001	ENSCAFT00000006406	144	144	48	F	ttC/ttT			./.	.	./.	.	0/1	34	0/1	34
1	107901871	C	T	92.58	T	EMP3	3_prime_UTR_variant	ENSCAFG00000004034	ENSCAFT00000006464	1268							0/1	20	./.	3	0/0	57	./.	6
1	107901871				T	TMEM143	downstream_gene_variant	ENSCAFG00000004029	ENSCAFT00000006450						227
1	108363589	G	A	233.15	A	GLTSCR1	downstream_gene_variant	ENSCAFG00000004101	ENSCAFT00000047420						174		0/0	45	0/0	99	0/0	99	0/1	99
1	108363589				A	GLTSCR1	synonymous_variant	ENSCAFG00000004101	ENSCAFT00000006559	1527	1527	509	I	atC/atT
1	108895031	T	G	1768.15	G	ZC3H4	synonymous_variant	ENSCAFG00000004182	ENSCAFT00000045835	1209	1209	403	P	ccT/ccG			0/0	99	0/0	99	0/0	99	0/1	99
1	108895031				G	ZC3H4	synonymous_variant	ENSCAFG00000004182	ENSCAFT00000006714	2694	2694	898	P	ccT/ccG
1	109158184	C	T	3755.15	T	SLC1A5	synonymous_variant	ENSCAFG00000004201	ENSCAFT00000006748	1113	1113	371	C	tgC/tgT			0/1	99	0/0	99	0/0	99	0/0	99
1	109277352	G	C	224.1	C	PTGIR	missense_variant	ENSCAFG00000004277	ENSCAFT00000006868	1336	923	308	C/S	tGc/tCc		deleterious(0)	0/0	42	0/1	68	./.	12	./.	3
1	109681904	G	A	34.46	A	NOVA2	missense_variant	ENSCAFG00000004359	ENSCAFT00000006989	527	511	171	G/S	Ggt/Agt		deleterious(0.01)	./.	9	./.	12	0/1	67	0/0	21
1	110147994	C	T	1138.15	T	ERCC1	downstream_gene_variant	ENSCAFG00000004448	ENSCAFT00000007174						593		0/0	99	0/0	99	0/0	99	0/1	99
1	110147994				T	CD3EAP	missense_variant	ENSCAFG00000004455	ENSCAFT00000007180	944	485	162	G/E	gGg/gAg		tolerated(0.06)
1	110410800	C	T	38.45	T	ZNF296	missense_variant	ENSCAFG00000004575	ENSCAFT00000007381	496	496	166	R/C	Cgc/Tgc		deleterious(0)	./.	9	0/1	51	./.	12	0/0	36
1	110540686	G	A	1066.2	A	PRR2	downstream_gene_variant	ENSCAFG00000004626	ENSCAFT00000007452						1838		0/0	15	0/0	69	0/1	99	0/0	99
1	110540686				A	TOMM40	synonymous_variant	ENSCAFG00000004620	ENSCAFT00000007449	174	174	58	P	ccC/ccT
1	110602758	C	A	504.15	A	CBLC	missense_variant	ENSCAFG00000004651	ENSCAFT00000007480	460	460	154	A/S	Gcc/Tcc		tolerated(0.19)	0/1	99	0/0	99	0/0	99	0/0	99
1	111183174	T	A	290.31	A		synonymous_variant	ENSCAFG00000029288	ENSCAFT00000043077	1690	1377	459	A	gcA/gcT			./.	12	0/1	99	0/0	24	0/0	15
1	111628642	G	A	73.21	A	PHLDB3	3_prime_UTR_variant	ENSCAFG00000004757	ENSCAFT00000007658	2595							0/1	63	0/0	21	./.	.	./.	9
1	111828202	T	C	57.04	C	CEACAM28	missense_variant	ENSCAFG00000004779	ENSCAFT00000045512	1224	830	277	M/T	aTg/aCg		tolerated(0.12)	0/0	48	./.	6	0/1	86	0/0	57
1	111828202				C	CEACAM28	intron_variant	ENSCAFG00000004779	ENSCAFT00000046568
1	111828202				C	CEACAM28	missense_variant	ENSCAFG00000004779	ENSCAFT00000007721	830	830	277	M/T	aTg/aCg		tolerated(0.13)
1	112005660	C	T	462.15	T	HSL	synonymous_variant	ENSCAFG00000004813	ENSCAFT00000037578	1863	1863	621	L	ctC/ctT			0/1	99	0/0	51	0/0	99	0/0	72
1	112005660				T	HSL	synonymous_variant	ENSCAFG00000004813	ENSCAFT00000007755	2628	2628	876	L	ctC/ctT
1	112023007	G	A	837.15	A	MEGF8	synonymous_variant	ENSCAFG00000004824	ENSCAFT00000007776	7317	7317	2439	F	ttC/ttT			0/0	99	0/1	99	0/0	99	0/0	99
1	112039648	G	A	479.15	A	MEGF8	synonymous_variant	ENSCAFG00000004824	ENSCAFT00000007776	3645	3645	1215	H	caC/caT			0/0	99	0/1	99	0/0	99	0/0	99
1	112149232	C	A	261.15	A	DEDD2	missense_variant	ENSCAFG00000004892	ENSCAFT00000007868	337	308	103	A/E	gCg/gAg		deleterious(0.01)	0/0	48	0/0	51	0/0	57	0/1	99
1	112263132	C	T	460.15	T	ZNF574	missense_variant	ENSCAFG00000004926	ENSCAFT00000007925	1624	1624	542	G/S	Ggc/Agc		tolerated(0.82)	0/1	99	0/0	99	0/0	99	0/0	99
1	112395154	G	A	643.42	A		synonymous_variant	ENSCAFG00000030005	ENSCAFT00000042928	1933	1830	610	C	tgC/tgT			0/1	99	0/0	99	0/0	99	0/1	99
1	112395154				A		synonymous_variant	ENSCAFG00000030005	ENSCAFT00000050077	1698	1698	566	C	tgC/tgT
1	112572035	C	T	379.15	T	ATP5SL	synonymous_variant	ENSCAFG00000004995	ENSCAFT00000008025	405	405	135	A	gcC/gcT			0/0	81	0/1	99	0/0	48	0/0	63
1	112572035				T		downstream_gene_variant	ENSCAFG00000005006	ENSCAFT00000008047						3858
1	112572035				T		upstream_gene_variant	ENSCAFG00000032618	ENSCAFT00000045986						3858
1	112579631	C	T	277.15	T	ATP5SL	downstream_gene_variant	ENSCAFG00000004995	ENSCAFT00000008025						4396		0/0	99	0/1	99	0/0	99	0/0	99
1	112579631				T		3_prime_UTR_variant	ENSCAFG00000005006	ENSCAFT00000008047	2029
1	112579631				T		intron_variant	ENSCAFG00000032618	ENSCAFT00000045986
1	112579631				T		downstream_gene_variant	ENSCAFG00000005006	ENSCAFT00000008048						52
1	113069184	G	C	74.78	C	ADCK4	missense_variant	ENSCAFG00000005108	ENSCAFT00000043464	964	964	322	E/Q	Gag/Cag		deleterious(0.04)	0/0	18	./.	6	0/1	99	0/0	21
1	113069184				C	ADCK4	missense_variant	ENSCAFG00000005108	ENSCAFT00000008218	1075	1075	359	E/Q	Gag/Cag		deleterious(0.05)
1	113126531	C	T	65.18	T	LTBP4	missense_variant	ENSCAFG00000005133	ENSCAFT00000008260	3879	3850	1284	V/M	Gtg/Atg		deleterious(0.02)	0/1	98	0/0	18	0/0	66	0/0	30
1	113126531				T	LTBP4	missense_variant	ENSCAFG00000005133	ENSCAFT00000008264	4288	4288	1430	V/M	Gtg/Atg		deleterious(0.02)
1	113126532	G	T	61.18	T	LTBP4	missense_variant	ENSCAFG00000005133	ENSCAFT00000008260	3878	3849	1283	N/K	aaC/aaA		deleterious(0.01)	0/1	94	0/0	18	0/0	66	0/0	24
1	113126532				T	LTBP4	missense_variant	ENSCAFG00000005133	ENSCAFT00000008264	4287	4287	1429	N/K	aaC/aaA		deleterious(0.01)
1	113604031	C	T	2760.15	T	FCGBP	synonymous_variant	ENSCAFG00000005406	ENSCAFT00000008689	434	408	136	Y	taC/taT			0/0	69	0/0	99	0/0	99	0/1	99
1	113650982	G	T	1081.15	T	DYRK1B	missense_variant	ENSCAFG00000005428	ENSCAFT00000008733	1510	1345	449	G/C	Ggc/Tgc		deleterious(0.04)	0/1	99	0/0	99	0/0	99	0/0	99
1	113749690	G	C	540.86	C	TIMM50	downstream_gene_variant	ENSCAFG00000005445	ENSCAFT00000037759						413		0/0	18	0/0	57	0/0	63	1/1	45
1	113749690				C	TIMM50	3_prime_UTR_variant	ENSCAFG00000005445	ENSCAFT00000008754	2277
1	113749690				C	DLL3	upstream_gene_variant	ENSCAFG00000005441	ENSCAFT00000008747						4083
1	113815930	G	A	1326.15	A	ZFP36	downstream_gene_variant	ENSCAFG00000005530	ENSCAFT00000008910						343		0/0	99	0/1	99	0/0	99	0/0	99
1	113815930				A	ZFP36	3_prime_UTR_variant	ENSCAFG00000005530	ENSCAFT00000042970	1335
1	113892194	G	A	744.87	A	LRFN1	synonymous_variant	ENSCAFG00000005579	ENSCAFT00000008986	1185	711	237	S	tcG/tcA			0/0	18	0/0	63	0/0	36	1/1	60
1	114014429	C	T	267.05	T	PAK4	synonymous_variant	ENSCAFG00000005606	ENSCAFT00000009039	1461	798	266	E	gaG/gaA			0/1	99	./.	9	0/0	99	0/0	99
1	114291674	G	A	480.19	A	LGALS4	upstream_gene_variant	ENSCAFG00000005673	ENSCAFT00000009136						1062		0/1	94	0/0	18	0/1	99	0/1	99
1	114291674				A	ECH1	3_prime_UTR_variant	ENSCAFG00000005661	ENSCAFT00000009118	1823
1	114625786	G	A	290.15	A	PSMD8	synonymous_variant	ENSCAFG00000005931	ENSCAFT00000009584	496	282	94	G	ggC/ggT			0/0	99	0/0	99	0/1	99	0/0	99
1	114666918	C	T	917.16	T	KCNK6	downstream_gene_variant	ENSCAFG00000005941	ENSCAFT00000009597						3232		0/0	84	0/0	69	0/1	99	0/0	24
1	114666918				T		upstream_gene_variant	ENSCAFG00000029272	ENSCAFT00000044126						4308
1	114666918				T	KCNK6	3_prime_UTR_variant	ENSCAFG00000005941	ENSCAFT00000043287	3967
1	114699737	C	T	8680.74	T	SPINT2	missense_variant	ENSCAFG00000005948	ENSCAFT00000009605	751	751	251	V/I	Gtc/Atc		tolerated(0.05)	0/0	99	0/0	99	0/0	99	1/1	99
1	116376095	G	A	61.58	A	ZNF382	synonymous_variant	ENSCAFG00000006524	ENSCAFT00000010562	522	54	18	E	gaG/gaA			0/1	94	0/0	30	./.	6	0/0	15
1	116376095				A	ZNF382	intron_variant	ENSCAFG00000006524	ENSCAFT00000010537
1	116381237	A	G	342.15	G	ZNF382	synonymous_variant	ENSCAFG00000006524	ENSCAFT00000010562	1482	1014	338	E	gaA/gaG			0/1	99	0/0	99	0/0	54	0/0	99
1	116381237				G	ZNF382	downstream_gene_variant	ENSCAFG00000006524	ENSCAFT00000010537						288
1	116460130	T	C	7164.74	C	ZNF146	synonymous_variant	ENSCAFG00000031807	ENSCAFT00000048484	126	126	42	K	aaA/aaG			0/0	99	0/0	99	0/0	99	1/1	99
1	116853249	G	A	315.17	A		missense_variant	ENSCAFG00000006785	ENSCAFT00000010921	1373	1373	458	A/V	gCc/gTc		deleterious(0.03)	0/0	30	0/0	33	0/1	99	0/0	24
1	116853249				A		missense_variant	ENSCAFG00000006785	ENSCAFT00000048481	1223	1217	406	A/V	gCc/gTc		tolerated(0.1)
1	117319742	A	G	231.78	G	USF2	upstream_gene_variant	ENSCAFG00000007054	ENSCAFT00000037592						1979		0/1	99	0/1	54	0/1	21	0/1	92
1	117319742				G	LSR	3_prime_UTR_variant	ENSCAFG00000007086	ENSCAFT00000011359	2828
1	117320495	C	A	2477.15	A	USF2	upstream_gene_variant	ENSCAFG00000007054	ENSCAFT00000037592						2732		0/0	99	0/0	99	0/1	99	0/0	99
1	117320495				A	LSR	missense_variant	ENSCAFG00000007086	ENSCAFT00000011359	2167	1178	393	R/L	cGg/cTg		deleterious(0.05)
1	117320496	G	A	2522.15	A	USF2	upstream_gene_variant	ENSCAFG00000007054	ENSCAFT00000037592						2733		0/0	99	0/0	99	0/1	99	0/0	99
1	117320496				A	LSR	missense_variant	ENSCAFG00000007086	ENSCAFT00000011359	2166	1177	393	R/W	Cgg/Tgg		deleterious(0.01)
1	117726704	G	A	513.15	A	ZNF181	missense_variant	ENSCAFG00000031202	ENSCAFT00000045447	915	781	261	H/Y	Cat/Tat		tolerated(0.11)	0/0	99	0/0	99	0/1	99	0/0	78
1	117883559	C	A	1070.78	A	UBA2	missense_variant	ENSCAFG00000007258	ENSCAFT00000011647	532	50	17	G/V	gGg/gTg		tolerated(0.23)	0/0	18	0/0	57	0/0	93	1/1	84
1	117883559				A	WTIP	downstream_gene_variant	ENSCAFG00000007238	ENSCAFT00000011663						3581
1	117883559				A	WTIP	intron_variant	ENSCAFG00000007238	ENSCAFT00000049215
1	117915900	C	T	2065.74	T	WTIP	missense_variant	ENSCAFG00000007238	ENSCAFT00000011663	1411	466	156	G/R	Gga/Aga		tolerated(0.51)	0/0	99	0/0	99	0/0	99	1/1	99
1	117915900				T	WTIP	intron_variant	ENSCAFG00000007238	ENSCAFT00000049215
1	117919138	G	A	49.75	A	GPI	downstream_gene_variant	ENSCAFG00000007303	ENSCAFT00000011733						3513		0/0	18	0/1	65	0/1	16	0/0	18
1	117919138				A	WTIP	5_prime_UTR_variant	ENSCAFG00000007238	ENSCAFT00000011663	177
1	117919138				A	WTIP	upstream_gene_variant	ENSCAFG00000007238	ENSCAFT00000049215						1086
1	117924823	G	A	9152.74	A	GPI	synonymous_variant	ENSCAFG00000007303	ENSCAFT00000011733	1262	1101	367	S	tcC/tcT			0/0	99	0/0	99	0/0	99	1/1	99
1	118005994	G	T	1680.15	T	KIAA0355	5_prime_UTR_variant	ENSCAFG00000007339	ENSCAFT00000011755	446							0/0	99	0/0	99	0/1	99	0/0	99
1	119124102	G	T	103.43	T	CEP89	missense_variant	ENSCAFG00000007486	ENSCAFT00000048007	1088	170	57	R/L	cGa/cTa			0/0	39	./.	9	./.	9	0/1	99
1	119124102				T	CEP89	upstream_gene_variant	ENSCAFG00000007486	ENSCAFT00000011995						2299
1	119124102				T	C19orf40	intron_variant	ENSCAFG00000029358	ENSCAFT00000042873
1	119124102				T	CEP89	upstream_gene_variant	ENSCAFG00000007486	ENSCAFT00000011991						53
1	119124102				T	RHPN2	downstream_gene_variant	ENSCAFG00000007465	ENSCAFT00000011953						1337
1	119124102				T	RHPN2	downstream_gene_variant	ENSCAFG00000007465	ENSCAFT00000043089						1337
1	119200250	C	T	35.44	T	CEP89	3_prime_UTR_variant	ENSCAFG00000007486	ENSCAFT00000048007	6446							0/1	33	./.	6	./.	6	0/1	36
1	119200250				T	CEP89	downstream_gene_variant	ENSCAFG00000007486	ENSCAFT00000011995						3059
1	119458492	A	G	2418.15	G	DPY19L3	downstream_gene_variant	ENSCAFG00000007575	ENSCAFT00000012133						2973		0/0	99	0/1	99	0/0	99	0/0	99
1	119458492				G	DPY19L3	3_prime_UTR_variant	ENSCAFG00000007575	ENSCAFT00000037089	2983
1	119458870	T	C	3505.15	C	DPY19L3	downstream_gene_variant	ENSCAFG00000007575	ENSCAFT00000012133						2595		0/0	99	0/1	99	0/0	99	0/0	99
1	119458870				C	DPY19L3	3_prime_UTR_variant	ENSCAFG00000007575	ENSCAFT00000037089	2605
1	120452963	C	G	251.8	G	TSHZ3	synonymous_variant	ENSCAFG00000007592	ENSCAFT00000012149	483	483	161	G	ggC/ggG			0/0	27	0/1	98	0/1	99	0/0	18
2	3487896	C	T	710.15	T	NRP1	synonymous_variant	ENSCAFG00000003776	ENSCAFT00000006098	1237	939	313	P	ccC/ccT			0/0	27	0/0	99	0/1	99	0/0	72
2	4475652	T	C	59.58	C		missense_variant	ENSCAFG00000024834	ENSCAFT00000038392	2890	2890	964	I/V	Ata/Gta		tolerated(0.68)	./.	6	0/0	63	0/1	86	./.	.
2	8912640	G	A	6003.74	A	KIAA1217	missense_variant	ENSCAFG00000004237	ENSCAFT00000006799	4372	4372	1458	R/W	Cgg/Tgg		deleterious(0)	0/0	99	0/0	99	0/0	99	1/1	99
2	8912640				A	KIAA1217	missense_variant	ENSCAFG00000004237	ENSCAFT00000006802	4132	4132	1378	R/W	Cgg/Tgg		deleterious(0)
2	11330663	G	A	364.15	A	DNAJC1	missense_variant	ENSCAFG00000004152	ENSCAFT00000006665	1696	1352	451	R/K	aGg/aAg		tolerated(0.56)	0/1	99	0/0	99	0/0	99	0/0	99
2	11360603	C	G	1042.15	G	MLLT10	synonymous_variant	ENSCAFG00000004145	ENSCAFT00000045844	2265	2265	755	V	gtG/gtC			0/0	99	0/0	99	0/1	99	0/0	51
2	11360603				G	MLLT10	synonymous_variant	ENSCAFG00000004145	ENSCAFT00000006652	2283	2283	761	V	gtG/gtC
2	11360603				G	MLLT10	synonymous_variant	ENSCAFG00000004145	ENSCAFT00000048055	2741	2379	793	V	gtG/gtC
2	14873637	G	A	488.15	A	KIF5B	missense_variant	ENSCAFG00000004076	ENSCAFT00000006549	3384	2716	906	V/I	Gtc/Atc		deleterious(0.04)	0/1	99	0/0	99	0/0	99	0/0	99
2	16454462	C	T	54.59	T	KIAA1462	3_prime_UTR_variant	ENSCAFG00000003987	ENSCAFT00000006392	6272							0/1	87	0/0	15	./.	6	0/0	27
2	24299101	C	T	400.03	T	DHTKD1	3_prime_UTR_variant	ENSCAFG00000004827	ENSCAFT00000007779	3623							0/0	45	0/0	15	./.	12	1/1	33
2	28167421	G	A	291.15	A	TAF3	synonymous_variant	ENSCAFG00000005022	ENSCAFT00000008068	1221	1221	407	F	ttC/ttT			0/1	99	0/0	99	0/0	63	0/0	99
2	28167967	A	C	329.15	C	TAF3	synonymous_variant	ENSCAFG00000005022	ENSCAFT00000008068	675	675	225	P	ccT/ccG			0/1	99	0/0	99	0/0	99	0/0	99
2	28168159	C	A	197.15	A	TAF3	missense_variant	ENSCAFG00000005022	ENSCAFT00000008068	483	483	161	E/D	gaG/gaT		tolerated(0.74)	0/1	99	0/0	99	0/0	57	0/0	84
2	30184903	C	T	2589.15	T	FAM208B	synonymous_variant	ENSCAFG00000005226	ENSCAFT00000008426	5988	5988	1996	G	ggG/ggA			0/0	99	0/0	99	0/1	99	0/0	99
2	30313775	C	T	308.15	T	ASB13	3_prime_UTR_variant	ENSCAFG00000005233	ENSCAFT00000008435	2957							0/1	99	0/0	42	0/0	33	0/0	51
2	32221202	G	A	1522.15	A	PITRM1	downstream_gene_variant	ENSCAFG00000005392	ENSCAFT00000008673						1366		0/1	99	0/0	99	0/0	99	0/0	99
2	32221202				A	PFKP	synonymous_variant	ENSCAFG00000005468	ENSCAFT00000008870	2238	2238	746	Y	taC/taT
2	32221202				A	PFKP	synonymous_variant	ENSCAFG00000005468	ENSCAFT00000008866	2325	2253	751	Y	taC/taT
2	33936685	C	T	228.25	T	GTPBP4	3_prime_UTR_variant	ENSCAFG00000005536	ENSCAFT00000008921	2466							0/0	30	0/0	33	0/1	51	0/0	33
2	34467163	G	A	201.15	A		downstream_gene_variant	ENSCAFG00000032466	ENSCAFT00000049626						3681		0/1	99	0/0	72	0/0	99	0/0	99
2	34467163				A	DIP2C	downstream_gene_variant	ENSCAFG00000005624	ENSCAFT00000044342						4124
2	34467163				A	DIP2C	missense_variant	ENSCAFG00000005624	ENSCAFT00000009094	4333	4333	1445	E/K	Gag/Aag		deleterious(0)
2	36310154	G	A	163.14	A	PCDHGA1	synonymous_variant	ENSCAFG00000023682	ENSCAFT00000009853	2214	2214	738	S	tcG/tcA			0/1	33	./.	3	0/1	59	0/1	99
2	36615434	T	C	226.1	C	ARAP3	intron_variant	ENSCAFG00000006214	ENSCAFT00000048849								0/0	45	0/0	42	0/0	99	1/1	21
2	36615434				C	ARAP3	missense_variant	ENSCAFG00000006214	ENSCAFT00000010054	4556	4556	1519	N/S	aAt/aGt		tolerated(0.49)
2	36615434				C	FCHSD1	upstream_gene_variant	ENSCAFG00000006203	ENSCAFT00000010029						3235
2	36637264	G	A	124.13	A	ARAP3	upstream_gene_variant	ENSCAFG00000006214	ENSCAFT00000048849						113		0/1	99	./.	2	0/0	99	0/0	45
2	36637264				A	ARAP3	missense_variant	ENSCAFG00000006214	ENSCAFT00000010054	323	323	108	P/L	cCt/cTt		deleterious(0.05)
2	36822779	C	T	8806.74	T	PCDH1	synonymous_variant	ENSCAFG00000006229	ENSCAFT00000010064	2539	2364	788	K	aaG/aaA			0/0	99	0/0	99	0/0	99	1/1	99
2	36823493	G	A	8341.74	A	PCDH1	synonymous_variant	ENSCAFG00000006229	ENSCAFT00000010064	1825	1650	550	F	ttC/ttT			0/0	99	0/0	99	0/0	99	1/1	99
2	36823583	G	A	8868.74	A	PCDH1	synonymous_variant	ENSCAFG00000006229	ENSCAFT00000010064	1735	1560	520	V	gtC/gtT			0/0	99	0/0	99	0/0	99	1/1	99
2	36880039	G	A	1560.76	A	PCDH12	downstream_gene_variant	ENSCAFG00000006239	ENSCAFT00000010074						4126		0/1	99	0/1	99	0/0	99	0/0	93
2	36880039				A	KIAA0141	3_prime_UTR_variant	ENSCAFG00000006236	ENSCAFT00000010073	1894
2	36886582	G	A	90	A	PCDH12	3_prime_UTR_variant	ENSCAFG00000006239	ENSCAFT00000010074	4360							0/1	25	0/1	99	./.	6	./.	9
2	36886582				A	KIAA0141	downstream_gene_variant	ENSCAFG00000006236	ENSCAFT00000010073						2831
2	36949431	C	A	225.08	A	GNPDA1	5_prime_UTR_variant	ENSCAFG00000006243	ENSCAFT00000010097	278							0/1	99	0/1	62	0/0	30	./.	12
2	40704949	G	A	230.1	A	RBM27	missense_variant	ENSCAFG00000006456	ENSCAFT00000010424	3031	3031	1011	D/N	Gac/Aac		tolerated(0.26)	1/1	21	0/0	69	0/0	72	0/0	54
2	40704949				A	RBM27	missense_variant	ENSCAFG00000006456	ENSCAFT00000049077	3743	3019	1007	D/N	Gac/Aac		tolerated(0.25)
2	43989455	A	G	1009.15	G	MAP3K1	missense_variant	ENSCAFG00000006917	ENSCAFT00000011105	4801	4360	1454	S/G	Agc/Ggc		tolerated(0.13)	0/0	99	0/0	99	0/1	99	0/0	99
2	44060751	C	A	605.15	A	MIER3	synonymous_variant	ENSCAFG00000006929	ENSCAFT00000011123	1611	1611	537	L	ctG/ctT			0/0	75	0/0	54	0/1	99	0/0	51
2	44060751				A	MIER3	synonymous_variant	ENSCAFG00000006929	ENSCAFT00000049472	1948	1542	514	L	ctG/ctT
2	44073674	C	T	124.15	T	MIER3	synonymous_variant	ENSCAFG00000006929	ENSCAFT00000011123	333	333	111	S	tcG/tcA			0/0	36	0/0	36	0/1	99	0/0	30
2	44073674				T	MIER3	synonymous_variant	ENSCAFG00000006929	ENSCAFT00000049472	667	261	87	S	tcG/tcA
2	52632392	G	A	1389.74	A	MAST4	missense_variant	ENSCAFG00000007586	ENSCAFT00000012140	5129	4930	1644	A/T	Gcc/Acc		deleterious(0)	0/0	99	0/0	99	1/1	80	0/0	99
2	54299817	A	G	80.76	G	CENPH	downstream_gene_variant	ENSCAFG00000007717	ENSCAFT00000012353						960		./.	.	0/0	15	0/1	66	./.	3
2	54299817				G	CENPH	3_prime_UTR_variant	ENSCAFG00000007717	ENSCAFT00000044846	1700
2	54300448	A	G	127.97	G	CENPH	downstream_gene_variant	ENSCAFG00000007717	ENSCAFT00000012353						1591		0/1	19	0/1	93	./.	9	0/1	69
2	54300448				G	CENPH	3_prime_UTR_variant	ENSCAFG00000007717	ENSCAFT00000044846	2331
2	54548419	A	G	39.59	G	OCLN	downstream_gene_variant	ENSCAFG00000007805	ENSCAFT00000012461						2989		./.	.	./.	.	0/1	35	0/1	31
2	54548419				G	OCLN	3_prime_UTR_variant	ENSCAFG00000007805	ENSCAFT00000046929	3871
2	54548419				G	OCLN	downstream_gene_variant	ENSCAFG00000007805	ENSCAFT00000012459						2989
2	56004481	C	G	403.15	G	FCHO2	missense_variant	ENSCAFG00000008180	ENSCAFT00000013009	2165	2165	722	S/C	tCc/tGc		tolerated(0.13)	0/0	66	0/0	99	0/1	99	0/0	69
2	56010492	C	T	339.15	T	FCHO2	3_prime_UTR_variant	ENSCAFG00000008180	ENSCAFT00000013009	3935							0/0	99	0/0	99	0/1	99	0/0	99
2	56044376	C	T	311.28	T	TMEM171	missense_variant	ENSCAFG00000031156	ENSCAFT00000049929	962	962	321	P/L	cCg/cTg		deleterious(0)	./.	9	1/1	15	0/0	18	./.	9
2	56365163	C	T	243.15	T	ANKRA2	3_prime_UTR_variant	ENSCAFG00000008224	ENSCAFT00000035905	1108							0/1	99	0/0	99	0/0	99	0/0	84
2	57917614	A	C	87.58	C		missense_variant	ENSCAFG00000023489	ENSCAFT00000036135	143	143	48	V/G	gTg/gGg		deleterious(0)	./.	6	0/1	65	0/1	21	./.	.
2	57982233	A	G	122.15	G		missense_variant	ENSCAFG00000008357	ENSCAFT00000013304	100	100	34	T/A	Acc/Gcc		tolerated(1)	0/0	48	0/0	39	0/1	99	0/0	30
2	58505073	G	T	1744.15	T	MMP15	synonymous_variant	ENSCAFG00000008544	ENSCAFT00000013571	1815	1815	605	G	ggC/ggA			0/0	99	0/0	99	0/1	99	0/0	99
2	58505121	G	A	1888.15	A	MMP15	synonymous_variant	ENSCAFG00000008544	ENSCAFT00000013571	1767	1767	589	G	ggC/ggT			0/0	99	0/0	99	0/1	99	0/0	99
2	58553478	C	T	1208.76	T	USB1	upstream_gene_variant	ENSCAFG00000008556	ENSCAFT00000013577						2859		0/0	87	0/1	99	0/1	99	0/0	99
2	58553478				T	ZNF319	synonymous_variant	ENSCAFG00000008559	ENSCAFT00000013578	717	717	239	C	tgC/tgT
2	58814681	A	T	1060.15	T	GPR56	missense_variant	ENSCAFG00000024385	ENSCAFT00000013822	590	557	186	L/H	cTc/cAc		deleterious(0)	0/1	99	0/0	99	0/0	99	0/0	99
2	59023547	G	A	1018.16	A	CX3CL1	missense_variant	ENSCAFG00000008761	ENSCAFT00000013917	1533	683	228	T/I	aCc/aTc		tolerated(0.22)	0/0	99	0/0	99	0/0	99	0/1	99
2	59124036	T	A	1111.15	A	PLLP	synonymous_variant	ENSCAFG00000008782	ENSCAFT00000013947	453	453	151	I	atT/atA			0/0	99	0/0	99	0/1	99	0/0	99
2	59124036				A	ARL2BP	downstream_gene_variant	ENSCAFG00000008785	ENSCAFT00000013951						4457
2	59124036				A	PLLP	synonymous_variant	ENSCAFG00000008782	ENSCAFT00000047246	1285	336	112	I	atT/atA
2	62387553	C	T	113.86	T	CHD9	intron_variant	ENSCAFG00000009699	ENSCAFT00000015413								0/1	26	0/1	15	./.	12	./.	.
2	62387553				T	EEF1A1	synonymous_variant	ENSCAFG00000009708	ENSCAFT00000015415	1272	1272	424	F	ttC/ttT
2	65213297	C	T	98.16	T	HEATR3	missense_variant	ENSCAFG00000009946	ENSCAFT00000015825	748	429	143	M/I	atG/atA		tolerated(0.71)	0/1	99	0/0	48	0/0	69	0/0	39
2	65217909	C	A	691.15	A	HEATR3	missense_variant	ENSCAFG00000009946	ENSCAFT00000015825	389	70	24	A/S	Gcg/Tcg		tolerated(0.57)	0/0	60	0/0	39	0/1	99	0/0	99
2	66561491	C	T	2283.15	T	N4BP1	synonymous_variant	ENSCAFG00000010010	ENSCAFT00000015923	2424	2364	788	I	atC/atT			0/0	99	0/0	99	0/0	99	0/1	99
2	66707776	C	G	1088.15	G	SIAH1	missense_variant	ENSCAFG00000010013	ENSCAFT00000015934	366	366	122	F/L	ttC/ttG		tolerated(0.08)	0/0	99	0/0	99	0/1	99	0/0	99
2	66707776				G	LONP2	downstream_gene_variant	ENSCAFG00000010029	ENSCAFT00000015963						4178
2	67677383	A	G	1091.15	G	ITFG1	missense_variant	ENSCAFG00000010234	ENSCAFT00000016252	1279	1279	427	I/V	Atc/Gtc		tolerated(1)	0/0	75	0/0	99	0/1	99	0/0	99
2	72079777	G	T	154.96	T	PHACTR4	5_prime_UTR_variant	ENSCAFG00000011801	ENSCAFT00000042737	418							./.	3	0/0	27	0/0	15	0/1	71
2	73090110	G	A	318.15	A	NHE1	missense_variant	ENSCAFG00000012207	ENSCAFT00000019381	1448	638	213	C/Y	tGc/tAc		deleterious(0)	0/1	99	0/0	99	0/0	99	0/0	99
2	73374633	C	T	8234.74	T	ARID1A	synonymous_variant	ENSCAFG00000012314	ENSCAFT00000044234	306	294	98	Q	caG/caA			0/0	99	0/0	99	0/0	99	1/1	99
2	73374633				T	ZDHHC18	intron_variant	ENSCAFG00000012297	ENSCAFT00000019525
2	73374633				T	ARID1A	synonymous_variant	ENSCAFG00000012314	ENSCAFT00000019631	1446	1446	482	Q	caG/caA
2	74579896	G	A	33.15	A		3_prime_UTR_variant	ENSCAFG00000012895	ENSCAFT00000035993	1599							0/1	66	0/0	36	0/0	33	0/0	75
2	75232621	G	A	3629.74	A	NIPAL3	synonymous_variant	ENSCAFG00000012956	ENSCAFT00000020568	535	42	14	L	ctC/ctT			0/0	99	0/0	99	1/1	99	0/0	99
2	75286664	A	G	31.37	G	GRHL3	downstream_gene_variant	ENSCAFG00000012994	ENSCAFT00000020638						4757		0/0	21	0/0	99	0/0	21	0/1	64
2	75286664				G	GRHL3	downstream_gene_variant	ENSCAFG00000012994	ENSCAFT00000049943						3865
2	75286664				G	STPG1	3_prime_UTR_variant	ENSCAFG00000012966	ENSCAFT00000020574	2178
2	75476073	A	G	48.96	G	IL22RA1	3_prime_UTR_variant	ENSCAFG00000030698	ENSCAFT00000048626	3684							0/1	80	0/0	39	./.	3	./.	.
2	75478031	A	G	111.17	G	MYOM3	upstream_gene_variant	ENSCAFG00000013042	ENSCAFT00000020713						3046		0/1	33	0/1	63	./.	.	./.	.
2	75478031				G	IL22RA1	3_prime_UTR_variant	ENSCAFG00000030698	ENSCAFT00000048626	5642
2	75604699	G	A	3393.15	A		synonymous_variant	ENSCAFG00000030375	ENSCAFT00000046020	150	150	50	T	acC/acT			0/0	99	0/0	99	0/1	99	0/0	99
2	75713729	C	T	136.42	T	PITHD1	3_prime_UTR_variant	ENSCAFG00000013210	ENSCAFT00000020961	2322							./.	6	0/0	24	0/1	62	./.	3
2	75713729				T	HMGCL	intron_variant	ENSCAFG00000013085	ENSCAFT00000047038
2	75713729				T	LYPLA2	upstream_gene_variant	ENSCAFG00000030641	ENSCAFT00000047677						1632
2	76650982	G	A	3124.15	A	C1QB	synonymous_variant	ENSCAFG00000032344	ENSCAFT00000043093	652	357	119	I	atC/atT			0/0	99	0/0	99	0/1	99	0/0	99
2	77355909	C	T	8175.74	T	HSPG2	missense_variant	ENSCAFG00000014773	ENSCAFT00000023453	7946	7946	2649	T/I	aCc/aTc		tolerated(0.2)	0/0	99	0/0	99	1/1	99	0/0	99
2	77355909				T	HSPG2	missense_variant	ENSCAFG00000014773	ENSCAFT00000044491	10260	9833	3278	T/I	aCc/aTc		tolerated(0.18)
2	77355909				T	HSPG2	missense_variant	ENSCAFG00000014773	ENSCAFT00000045470	10061	10061	3354	T/I	aCc/aTc		tolerated(0.14)
2	78013956	G	A	351.15	A	EIF4G3	synonymous_variant	ENSCAFG00000014975	ENSCAFT00000023778	394	123	41	V	gtG/gtA			0/1	99	0/0	99	0/0	99	0/0	99
2	78040277	G	T	257.15	T	EIF4G3	missense_variant	ENSCAFG00000014975	ENSCAFT00000023778	993	722	241	G/V	gGa/gTa		tolerated(0.1)	0/0	99	0/0	99	0/1	99	0/0	99
2	78204676	T	C	30.41	C	HP1BP3	3_prime_UTR_variant	ENSCAFG00000015005	ENSCAFT00000023825	2614							./.	9	0/0	15	0/0	24	0/1	63
2	79683377	T	C	1944.74	C	TAS1R2	intron_variant	ENSCAFG00000015468	ENSCAFT00000024558								1/1	99	0/0	72	0/0	99	0/0	99
2	79683377				C	TAS1R2	upstream_gene_variant	ENSCAFG00000015468	ENSCAFT00000045210						4532
2	79683377				C	TAS1R2	3_prime_UTR_variant	ENSCAFG00000015468	ENSCAFT00000044204	4627
2	81126281	G	A	3308.58	A		downstream_gene_variant	ENSCAFG00000027826	ENSCAFT00000042109						2424		0/0	99	./.	6	0/1	99	0/0	15
2	81126281				A	PADI2	synonymous_variant	ENSCAFG00000015813	ENSCAFT00000025070	968	333	111	P	ccG/ccA
2	81473084	G	T	261.15	T	RSG1	missense_variant	ENSCAFG00000015939	ENSCAFT00000025246	713	713	238	G/V	gGc/gTc		tolerated(0.54)	0/1	99	0/0	99	0/0	99	0/0	99
2	81491082	G	A	3952.74	A	ARHGEF19	missense_variant	ENSCAFG00000015945	ENSCAFT00000025253	440	440	147	R/Q	cGg/cAg		tolerated(0.23)	0/0	99	0/0	60	1/1	99	0/0	63
2	81497002	G	A	266.15	A	ARHGEF19	synonymous_variant	ENSCAFG00000015945	ENSCAFT00000025253	1866	1866	622	V	gtG/gtA			0/0	99	0/0	81	0/0	99	0/1	99
2	81541569	G	A	7460.74	A	EPHA2	missense_variant	ENSCAFG00000016011	ENSCAFT00000025475	941	772	258	G/S	Ggt/Agt		tolerated(0.05)	0/0	99	0/0	93	1/1	99	0/0	99
2	81541569				A	EPHA2	missense_variant	ENSCAFG00000016011	ENSCAFT00000025418	823	823	275	G/S	Ggt/Agt		tolerated(0.05)
2	81554179	C	T	1369.15	T	EPHA2	synonymous_variant	ENSCAFG00000016011	ENSCAFT00000025475	2290	2121	707	D	gaC/gaT			0/1	99	0/0	99	0/0	99	0/0	99
2	81554179				T	EPHA2	synonymous_variant	ENSCAFG00000016011	ENSCAFT00000025418	2193	2193	731	D	gaC/gaT
2	81679234	C	T	1020.74	T		downstream_gene_variant	ENSCAFG00000029341	ENSCAFT00000046344						4222		0/0	99	1/1	87	0/0	99	0/0	99
2	81679234				T	ZBTB17	synonymous_variant	ENSCAFG00000016122	ENSCAFT00000025572	963	963	321	G	ggC/ggT
2	81679529	C	T	720.15	T		downstream_gene_variant	ENSCAFG00000029341	ENSCAFT00000046344						3927		0/0	99	0/0	99	0/1	99	0/0	99
2	81679529				T	ZBTB17	synonymous_variant	ENSCAFG00000016122	ENSCAFT00000025572	1170	1170	390	F	ttC/ttT
2	81821255	C	T	1055.15	T	FBLIM1	3_prime_UTR_variant	ENSCAFG00000016138	ENSCAFT00000025606	1429							0/1	99	0/0	99	0/0	99	0/0	99
2	81867234	G	A	2366.15	A	SLC25A34	upstream_gene_variant	ENSCAFG00000016153	ENSCAFT00000025639						3869		0/1	99	0/0	99	0/0	99	0/0	99
2	81867234				A	PLEKHM2	synonymous_variant	ENSCAFG00000016184	ENSCAFT00000025696	2571	2571	857	L	ctC/ctT
2	81871020	G	A	962.15	A	PLEKHM2	synonymous_variant	ENSCAFG00000016184	ENSCAFT00000025696	1728	1728	576	S	agC/agT			0/1	99	0/0	99	0/0	99	0/0	99
2	81871539	G	A	8687.52	A	PLEKHM2	synonymous_variant	ENSCAFG00000016184	ENSCAFT00000025696	1209	1209	403	P	ccC/ccT			0/1	99	1/1	99	0/0	99	0/0	99
2	83552741	T	C	2477.15	C	PDPN	downstream_gene_variant	ENSCAFG00000016363	ENSCAFT00000037744						1742		0/1	99	0/0	99	0/0	99	0/0	99
2	83552741				C	PDPN	downstream_gene_variant	ENSCAFG00000016363	ENSCAFT00000025944						1742
2	83552741				C	PDPN	3_prime_UTR_variant	ENSCAFG00000016363	ENSCAFT00000046205	1622
2	83581322	G	A	70.15	A	PDPN	5_prime_UTR_variant	ENSCAFG00000016363	ENSCAFT00000046205	242							0/0	57	0/1	99	0/0	45	0/0	33
2	84023016	C	G	120.15	G	VPS13D	missense_variant	ENSCAFG00000016397	ENSCAFT00000025995	10211	10211	3404	R/P	cGt/cCt		deleterious(0.01)	0/0	84	0/0	99	0/1	99	0/0	99
2	84023016				G	VPS13D	missense_variant	ENSCAFG00000016397	ENSCAFT00000026009	10200	10124	3375	R/P	cGt/cCt		deleterious(0.01)
2	84028792	G	T	922.15	T	VPS13D	missense_variant	ENSCAFG00000016397	ENSCAFT00000025995	9781	9781	3261	R/S	Cgt/Agt		tolerated(0.61)	0/0	99	0/0	99	0/1	99	0/0	99
2	84028792				T	VPS13D	missense_variant	ENSCAFG00000016397	ENSCAFT00000026009	9770	9694	3232	R/S	Cgt/Agt		tolerated(0.63)
2	84144404	G	A	38.15	A	TNFRSF1B	synonymous_variant	ENSCAFG00000016422	ENSCAFT00000026036	1017	1017	339	D	gaC/gaT			0/1	29	0/0	39	0/0	78	0/0	51
2	84144493	C	T	72.18	T	TNFRSF1B	missense_variant	ENSCAFG00000016422	ENSCAFT00000026036	928	928	310	G/S	Ggc/Agc		tolerated(0.74)	0/0	18	0/1	99	0/0	99	0/0	87
2	84326280	G	A	1078.15	A	PLOD1	synonymous_variant	ENSCAFG00000016522	ENSCAFT00000026182	1339	1311	437	I	atC/atT			0/0	99	0/0	99	0/0	99	0/1	99
2	84353628	C	T	192.15	T	KIAA2013	missense_variant	ENSCAFG00000016536	ENSCAFT00000026187	1929	1859	620	P/L	cCt/cTt		deleterious(0)	0/0	99	0/0	99	0/1	99	0/0	99
2	84412555	C	T	267.15	T	CLCN6	3_prime_UTR_variant	ENSCAFG00000016542	ENSCAFT00000026203	3764							0/1	99	0/0	99	0/0	99	0/0	57
2	84412555				T	NPPA	downstream_gene_variant	ENSCAFG00000016539	ENSCAFT00000026190						4186
2	84549070	C	A	95.21	A	FBXO6	3_prime_UTR_variant	ENSCAFG00000029614	ENSCAFT00000049774	2563							0/0	15	0/1	99	./.	12	./.	12
2	84549070				A	MAD2L2	stop_gained	ENSCAFG00000016583	ENSCAFT00000026256	570	561	187	Y/*	taC/taA
2	84656211	C	T	454.03	T	PTCHD2	synonymous_variant	ENSCAFG00000016596	ENSCAFT00000026281	2736	2736	912	A	gcG/gcA			0/1	99	0/0	36	0/0	15	./.	9
2	84806119	C	T	1263.15	T	UBIAD1	missense_variant	ENSCAFG00000016599	ENSCAFT00000026285	1194	830	277	R/H	cGc/cAc		tolerated(0.23)	0/0	99	0/0	99	0/1	99	0/0	99
2	84973456	G	A	34.36	A	SRM	3_prime_UTR_variant	ENSCAFG00000032626	ENSCAFT00000045201	1644							0/1	64	./.	.	0/0	45	./.	9
2	84973456				A	MASP2	upstream_gene_variant	ENSCAFG00000016744	ENSCAFT00000026513						2633
2	85204132	C	T	142.15	T		synonymous_variant	ENSCAFG00000016771	ENSCAFT00000026548	2412	2412	804	S	tcC/tcT			0/1	99	0/0	99	0/0	42	0/0	78
2	85224582	T	C	129.13	C	APITD1	downstream_gene_variant	ENSCAFG00000016789	ENSCAFT00000026562						202		0/1	60	0/0	24	0/1	58	./.	9
2	85224582				C	APITD1	3_prime_UTR_variant	ENSCAFG00000016789	ENSCAFT00000046038	1389
2	85224582				C		downstream_gene_variant	ENSCAFG00000030888	ENSCAFT00000044825						3745
2	85224665	C	T	77.31	T	APITD1	downstream_gene_variant	ENSCAFG00000016789	ENSCAFT00000026562						119		0/0	33	0/0	24	0/1	29	./.	12
2	85224665				T	APITD1	3_prime_UTR_variant	ENSCAFG00000016789	ENSCAFT00000046038	1306
2	85224665				T		downstream_gene_variant	ENSCAFG00000030888	ENSCAFT00000044825						3828
3	254492	C	A	934.15	A		missense_variant	ENSCAFG00000007343	ENSCAFT00000011749	5411	5411	1804	S/I	aGt/aTt		tolerated(0.41)	0/1	99	0/0	99	0/0	99	0/0	99
3	17703693	G	T	290.62	T	ARRDC3	3_prime_UTR_variant	ENSCAFG00000008118	ENSCAFT00000012945	2162							./.	5	0/1	99	0/0	99	0/0	99
3	26351028	A	G	1851.74	G	MSH3	missense_variant	ENSCAFG00000008788	ENSCAFT00000013983	2639	2639	880	M/T	aTg/aCg		tolerated(0.8)	0/0	99	0/0	99	0/0	99	1/1	99
3	26891473	G	A	6243.74	A	SERINC5	3_prime_UTR_variant	ENSCAFG00000008891	ENSCAFT00000014130	2605							0/0	99	0/0	99	1/1	99	0/0	99
3	27027992	G	A	1549.75	A	MTX3	missense_variant	ENSCAFG00000009012	ENSCAFT00000014326	323	323	108	R/Q	cGa/cAa		tolerated(0.62)	0/0	24	0/0	99	1/1	99	0/0	30
3	27027992				A	MTX3	missense_variant	ENSCAFG00000009012	ENSCAFT00000046297	386	386	129	R/Q	cGa/cAa		tolerated(0.62)
3	27027992				A	MTX3	missense_variant	ENSCAFG00000009012	ENSCAFT00000042896	414	386	129	R/Q	cGa/cAa		tolerated(0.58)
3	27547242	G	A	694.74	A	JMY	3_prime_UTR_variant	ENSCAFG00000009055	ENSCAFT00000014395	2686							0/0	99	0/0	99	0/0	99	1/1	54
3	27743599	G	T	117.96	T	BHMT	missense_variant	ENSCAFG00000009093	ENSCAFT00000014467	886	356	119	A/E	gCa/gAa		deleterious(0)	0/1	99	0/0	90	./.	.	0/0	99
3	27743599				T	DMGDH	intron_variant	ENSCAFG00000009138	ENSCAFT00000014548
3	29026800	A	G	235.35	G	TBCA	3_prime_UTR_variant	ENSCAFG00000028682	ENSCAFT00000043844	1979							0/0	24	./.	9	0/0	93	0/1	99
3	29026800				G	TBCA	downstream_gene_variant	ENSCAFG00000028682	ENSCAFT00000014642						1705
3	29682227	C	G	333.22	G	AGGF1	synonymous_variant	ENSCAFG00000009268	ENSCAFT00000014724	24	24	8	S	tcG/tcC			./.	3	1/1	27	0/0	57	0/0	60
3	29799530	T	C	837.39	C	F2RL1	3_prime_UTR_variant	ENSCAFG00000009281	ENSCAFT00000014742	2916							0/1	99	0/1	99	0/1	99	0/1	99
3	29799530				C		intron_variant	ENSCAFG00000023143	ENSCAFT00000035410
3	32115362	A	C	724.15	C	CYFIP1	synonymous_variant	ENSCAFG00000009720	ENSCAFT00000015450	3614	2973	991	V	gtT/gtG			0/1	99	0/0	99	0/0	99	0/0	99
3	34098337	G	A	2880.96	A	GABRB3	3_prime_UTR_variant	ENSCAFG00000030702	ENSCAFT00000043201	1956							./.	.	0/0	99	0/0	21	0/1	99
3	40366065	T	C	1187.74	C	ASB7	3_prime_UTR_variant	ENSCAFG00000010679	ENSCAFT00000016975	3936							0/0	57	0/0	84	0/0	63	1/1	93
3	41601323	G	A	1649.45	A	SYNM	missense_variant	ENSCAFG00000010852	ENSCAFT00000017267	1302	1216	406	R/C	Cgt/Tgt		tolerated(0.14)	1/1	63	1/1	18	1/1	51	0/0	27
3	47412391	G	A	1852.76	A	FAM174B	missense_variant	ENSCAFG00000030859	ENSCAFT00000044049	172	172	58	G/S	Ggc/Agc		tolerated(0.26)	0/0	42	0/0	63	0/0	21	1/1	99
3	47412391				A		non_coding_exon_variant	ENSCAFG00000031906	ENSCAFT00000048642	84
3	51758454	C	A	504.15	A	DET1	missense_variant	ENSCAFG00000011510	ENSCAFT00000018270	898	898	300	D/Y	Gac/Tac		deleterious(0.02)	0/1	99	0/0	99	0/0	99	0/0	99
3	51758751	C	G	544.15	G	DET1	missense_variant	ENSCAFG00000011510	ENSCAFT00000018270	601	601	201	D/H	Gac/Cac		deleterious(0.05)	0/1	99	0/0	99	0/0	99	0/0	99
3	51817320	G	A	819.74	A	AEN	synonymous_variant	ENSCAFG00000011521	ENSCAFT00000047692	1032	780	260	T	acG/acA			0/0	99	0/0	45	0/0	99	1/1	72
3	51817320				A	AEN	synonymous_variant	ENSCAFG00000011521	ENSCAFT00000018286	780	780	260	T	acG/acA
3	53331089	T	C	72.15	C	MAN2A2	missense_variant	ENSCAFG00000012259	ENSCAFT00000019495	2020	1613	538	H/R	cAc/cGc		tolerated(0.46)	0/1	99	0/0	57	0/0	36	0/0	30
3	54086271	G	C	245.71	C	ALPK3	missense_variant	ENSCAFG00000012927	ENSCAFT00000045086	1455	966	322	E/D	gaG/gaC		deleterious(0.02)	0/0	99	0/0	24	1/1	21	./.	.
3	54086271				C	ALPK3	missense_variant	ENSCAFG00000012927	ENSCAFT00000020516	1005	1005	335	E/D	gaG/gaC		deleterious(0.02)
3	54086271				C	ALPK3	missense_variant	ENSCAFG00000012927	ENSCAFT00000045698	1224	1224	408	E/D	gaG/gaC		deleterious(0.02)
3	55911780	G	A	161.43	A		downstream_gene_variant	ENSCAFG00000027425	ENSCAFT00000041708						1126		0/0	18	0/0	27	0/1	99	./.	9
3	55911780				A	MEX3B	synonymous_variant	ENSCAFG00000013759	ENSCAFT00000021833	216	216	72	V	gtG/gtA
3	55911780				A	MEX3B	synonymous_variant	ENSCAFG00000013759	ENSCAFT00000048532	618	255	85	V	gtG/gtA
3	55911780				A	MEX3B	synonymous_variant	ENSCAFG00000013759	ENSCAFT00000048946	255	255	85	V	gtG/gtA
3	55915114	G	A	151.15	A		upstream_gene_variant	ENSCAFG00000027425	ENSCAFT00000041708						2126		./.	9	0/0	15	0/1	99	./.	3
3	55915114				A	MEX3B	downstream_gene_variant	ENSCAFG00000013759	ENSCAFT00000021833						999
3	55915114				A	MEX3B	3_prime_UTR_variant	ENSCAFG00000013759	ENSCAFT00000048532	3104
3	55915114				A	MEX3B	downstream_gene_variant	ENSCAFG00000013759	ENSCAFT00000048946						996
3	57355725	C	T	1603.52	T		missense_variant	ENSCAFG00000013972	ENSCAFT00000022159	347	190	64	V/I	Gtc/Atc		tolerated(0.73)	0/0	99	0/0	99	1/1	99	0/1	99
3	58191948	G	A	506.77	A	ADAMTS7	missense_variant	ENSCAFG00000014148	ENSCAFT00000022463	662	662	221	R/Q	cGg/cAg		tolerated(0.38)	0/0	30	0/1	99	1/1	36	./.	12
3	58336179	G	A	1282.63	A	ACSBG1	synonymous_variant	ENSCAFG00000014189	ENSCAFT00000022529	474	474	158	H	caC/caT			./.	6	0/1	99	./.	12	0/0	99
3	58336179				A	ACSBG1	synonymous_variant	ENSCAFG00000014189	ENSCAFT00000043911	811	534	178	H	caC/caT
3	59120598	T	C	1127.15	C	GRPEL1	downstream_gene_variant	ENSCAFG00000014364	ENSCAFT00000022815						4371		0/0	99	0/0	99	0/0	99	0/1	99
3	59120598				C	TADA2B	synonymous_variant	ENSCAFG00000014357	ENSCAFT00000022805	966	966	322	S	agT/agC
3	59129499	T	C	2480.15	C	GRPEL1	missense_variant	ENSCAFG00000014364	ENSCAFT00000022815	394	133	45	T/A	Aca/Gca		tolerated(0.54)	0/0	99	0/0	99	0/0	99	0/1	99
3	59853766	A	AT	282.91	T	ABLIM2	frameshift_variant	ENSCAFG00000014530	ENSCAFT00000023075	1730-1731	1730-1731	577					0/1	99	0/1	76	0/1	99	./.	.
3	59853766				T	ABLIM2	splice_donor_variant	ENSCAFG00000014530	ENSCAFT00000045774
3	59853766				T	ABLIM2	splice_donor_variant	ENSCAFG00000014530	ENSCAFT00000046666
3	59853767	C	T	268.95	T	ABLIM2	missense_variant	ENSCAFG00000014530	ENSCAFT00000023075	1730	1730	577	G/D	gGt/gAt		tolerated(0.36)	0/1	43	0/1	33	0/1	97	./.	.
3	59853767				T	ABLIM2	splice_donor_variant	ENSCAFG00000014530	ENSCAFT00000045774
3	59853767				T	ABLIM2	splice_donor_variant	ENSCAFG00000014530	ENSCAFT00000046666
3	59933011	G	A	9212.88	A	ABLIM2	synonymous_variant	ENSCAFG00000014530	ENSCAFT00000023075	246	246	82	F	ttC/ttT			0/0	99	0/0	99	1/1	99	0/0	99
3	59933011				A	ABLIM2	synonymous_variant	ENSCAFG00000014530	ENSCAFT00000045774	348	267	89	F	ttC/ttT
3	59933011				A	ABLIM2	synonymous_variant	ENSCAFG00000014530	ENSCAFT00000046666	288	252	84	F	ttC/ttT
3	60852888	T	C	39.18	C	LRPAP1	3_prime_UTR_variant	ENSCAFG00000014607	ENSCAFT00000023207	1427							0/0	48	0/0	63	0/0	36	0/1	72
3	61008803	G	A	335.15	A	RGS12	missense_variant	ENSCAFG00000029577	ENSCAFT00000048451	329	229	77	H/Y	Cat/Tat		deleterious(0)	0/1	99	0/0	99	0/0	99	0/0	39
3	61354630	C	T	504.15	T	NOP14	downstream_gene_variant	ENSCAFG00000014730	ENSCAFT00000023400						4097		0/0	54	0/0	36	0/0	87	0/1	99
3	61354630				T	ADD1	3_prime_UTR_variant	ENSCAFG00000014808	ENSCAFT00000023515	6007
3	61354630				T	ADD1	downstream_gene_variant	ENSCAFG00000014808	ENSCAFT00000023513						3547
3	61354630				T	MFSD10	synonymous_variant	ENSCAFG00000014747	ENSCAFT00000023433	969	969	323	Y	taC/taT
3	61562380	G	A	595.15	A	FAM193A	synonymous_variant	ENSCAFG00000014845	ENSCAFT00000023571	3792	3774	1258	A	gcC/gcT			0/0	99	0/0	99	0/0	99	0/1	99
3	61721991	G	A	908.15	A		downstream_gene_variant	ENSCAFG00000014856	ENSCAFT00000036593						1822		0/0	99	0/0	99	0/0	99	0/1	99
3	61721991				A		downstream_gene_variant	ENSCAFG00000014856	ENSCAFT00000023584						1816
3	61721991				A		3_prime_UTR_variant	ENSCAFG00000014856	ENSCAFT00000044321	2552
3	62212969	C	T	542.15	T	WHSC1	synonymous_variant	ENSCAFG00000014951	ENSCAFT00000043831	852	852	284	Q	caG/caA			0/1	99	0/0	99	0/0	99	0/0	99
3	62212969				T	WHSC1	synonymous_variant	ENSCAFG00000014951	ENSCAFT00000023738	861	861	287	Q	caG/caA
3	62880810	C	T	54.35	T	FAM184B	synonymous_variant	ENSCAFG00000015078	ENSCAFT00000023934	2268	2268	756	P	ccC/ccT			./.	9	0/0	27	0/0	42	0/1	87
3	62880810				T	FAM184B	synonymous_variant	ENSCAFG00000015078	ENSCAFT00000023933	3754	3675	1225	P	ccC/ccT
3	63027340	T	C	346.15	C		synonymous_variant	ENSCAFG00000015116	ENSCAFT00000023998	699	699	233	D	gaT/gaC			0/0	99	0/0	99	0/1	99	0/0	99
3	63877550	C	T	67.16	T	LDB2	synonymous_variant	ENSCAFG00000015135	ENSCAFT00000024036	1279	813	271	A	gcC/gcT			0/0	24	0/0	30	0/0	51	0/1	99
3	64260522	G	A	920.74	A	PROM1	5_prime_UTR_variant	ENSCAFG00000015233	ENSCAFT00000044445	178							0/0	99	0/0	99	1/1	78	0/0	33
3	66490260	G	T	465.15	T	BOD1L1	synonymous_variant	ENSCAFG00000015402	ENSCAFT00000037076	6879	6690	2230	L	ctG/ctT			0/0	99	0/0	99	0/0	99	0/1	99
3	66490260				T	BOD1L1	synonymous_variant	ENSCAFG00000015402	ENSCAFT00000024431	7050	7050	2350	L	ctG/ctT
3	69740137	G	A	76.16	A	ZBTB49	synonymous_variant	ENSCAFG00000015688	ENSCAFT00000024846	834	345	115	T	acG/acA			0/0	24	0/0	51	0/0	51	0/1	33
3	69740137				A	ZBTB49	synonymous_variant	ENSCAFG00000015688	ENSCAFT00000024851	908	345	115	T	acG/acA
3	69852976	G	T	58.15	T	STX18	missense_variant	ENSCAFG00000015700	ENSCAFT00000044059	527	527	176	T/K	aCa/aAa		tolerated(0.66)	0/0	36	0/1	91	0/0	99	0/0	63
3	69852976				T	STX18	missense_variant	ENSCAFG00000015700	ENSCAFT00000024868	527	527	176	T/K	aCa/aAa		tolerated(0.73)
3	69867220	G	A	2095.74	A	STX18	synonymous_variant	ENSCAFG00000015700	ENSCAFT00000044059	258	258	86	Y	taC/taT			0/0	60	0/0	99	1/1	99	0/0	99
3	69867220				A	STX18	synonymous_variant	ENSCAFG00000015700	ENSCAFT00000024868	258	258	86	Y	taC/taT
3	70826335	G	C	261.15	C	EVC2	synonymous_variant	ENSCAFG00000015738	ENSCAFT00000024922	3122	3096	1032	L	ctC/ctG			0/0	48	0/0	99	0/1	99	0/0	63
3	71707473	A	G	317.15	G	APBB2	missense_variant	ENSCAFG00000015887	ENSCAFT00000025166	929	929	310	H/R	cAc/cGc		tolerated(0.09)	0/1	99	0/0	99	0/0	99	0/0	99
3	71707473				G	APBB2	missense_variant	ENSCAFG00000015887	ENSCAFT00000036067	932	932	311	H/R	cAc/cGc		tolerated(0.08)
3	72126817	T	C	1172.67	C	RBM47	synonymous_variant	ENSCAFG00000015898	ENSCAFT00000025193	2148	1491	497	A	gcT/gcC			./.	7	1/1	72	1/1	24	0/0	78
3	72132480	A	C	396.15	C	RBM47	synonymous_variant	ENSCAFG00000015898	ENSCAFT00000025193	2245	1588	530	R	Agg/Cgg			0/0	36	0/0	99	0/0	99	0/1	99
3	72132766	C	G	1797.15	G	RBM47	3_prime_UTR_variant	ENSCAFG00000015898	ENSCAFT00000025193	2531							0/0	99	0/0	99	0/0	99	0/1	99
3	72134708	C	G	4848.15	G	RBM47	3_prime_UTR_variant	ENSCAFG00000015898	ENSCAFT00000025193	4473							0/0	99	0/0	99	0/0	99	0/1	99
3	73296178	C	T	547.15	T	KLHL5	missense_variant	ENSCAFG00000016145	ENSCAFT00000025629	1289	1289	430	R/Q	cGg/cAg		tolerated(0.17)	0/1	99	0/0	99	0/0	99	0/0	99
3	75657333	A	G	880.15	G	ARAP2	missense_variant	ENSCAFG00000016306	ENSCAFT00000025868	508	508	170	T/A	Act/Gct		tolerated(0.3)	0/0	69	0/0	99	0/0	99	0/1	99
3	80387127	G	A	445.2	A	PCDH7	synonymous_variant	ENSCAFG00000016342	ENSCAFT00000049980	1470	1470	490	S	tcC/tcT			0/0	51	0/0	99	0/1	56	0/0	15
3	80387127				A	PCDH7	synonymous_variant	ENSCAFG00000016342	ENSCAFT00000025920	1353	1353	451	S	tcC/tcT
3	82194436	G	A	372.06	A		3_prime_UTR_variant	ENSCAFG00000029510	ENSCAFT00000046933	1782							./.	12	0/0	48	0/1	21	0/1	99
3	82196787	T	G	186.39	G		missense_variant	ENSCAFG00000029510	ENSCAFT00000046933	1269	599	200	Q/P	cAg/cCg		deleterious(0.03)	./.	.	./.	.	0/1	30	0/1	27
3	82196935	G	A	461.76	A		missense_variant	ENSCAFG00000029510	ENSCAFT00000046933	1121	451	151	R/C	Cgc/Tgc		deleterious(0.03)	./.	.	./.	3	1/1	18	1/1	18
3	84646428	G	A	1492.15	A	SEL1L3	3_prime_UTR_variant	ENSCAFG00000016402	ENSCAFT00000026017	3514							0/0	78	0/1	99	0/0	99	0/0	99
3	84646534	T	G	751.15	G	SEL1L3	3_prime_UTR_variant	ENSCAFG00000016402	ENSCAFT00000026017	3620							0/0	84	0/1	99	0/0	99	0/0	99
3	85373490	C	T	123.15	T	CCDC149	missense_variant	ENSCAFG00000016494	ENSCAFT00000026138	1157	1157	386	A/V	gCg/gTg		tolerated(0.21)	0/0	54	0/0	48	0/0	66	0/1	99
3	85373789	G	A	211.15	A	CCDC149	3_prime_UTR_variant	ENSCAFG00000016494	ENSCAFT00000026138	1456							0/0	63	0/0	66	0/0	60	0/1	99
3	86284979	C	A	34.6	A	PPARGC1A	3_prime_UTR_variant	ENSCAFG00000016519	ENSCAFT00000035962	6341							0/0	15	0/0	39	0/1	67	0/0	39
3	88965334	C	A	1056.67	A	SLIT2	downstream_gene_variant	ENSCAFG00000016608	ENSCAFT00000026343						941		./.	2	0/0	66	0/1	99	0/1	99
3	88965334				A	SLIT2	3_prime_UTR_variant	ENSCAFG00000016608	ENSCAFT00000044488	5148
3	88967885	C	T	4576.15	T	SLIT2	missense_variant	ENSCAFG00000016608	ENSCAFT00000026343	4078	4078	1360	E/K	Gag/Aag		tolerated(0.7)	0/0	99	0/0	99	0/0	99	0/1	99
3	88967885				T	SLIT2	missense_variant	ENSCAFG00000016608	ENSCAFT00000044488	3695	3499	1167	E/K	Gag/Aag		tolerated(0.85)
3	91260660	G	A	65.16	A	LCORL	synonymous_variant	ENSCAFG00000016672	ENSCAFT00000026403	1419	1419	473	R	agG/agA			0/0	33	0/0	99	0/1	98	0/0	22
3	91400759	C	T	315.15	T	CTBP1	downstream_gene_variant	ENSCAFG00000016687	ENSCAFT00000026428						103		0/0	63	0/0	39	0/1	99	0/0	87
3	91400759				T	CTBP1	3_prime_UTR_variant	ENSCAFG00000016687	ENSCAFT00000047481	1836
3	91737740	C	T	618.32	T	MYL5	downstream_gene_variant	ENSCAFG00000016772	ENSCAFT00000026554						838		1/1	30	./.	6	0/1	27	0/1	44
3	91737740				T	MFSD7	missense_variant	ENSCAFG00000016764	ENSCAFT00000026538	1421	1421	474	A/V	gCg/gTg		deleterious(0.04)
3	91817483	C	G	601.15	G	PIGG	synonymous_variant	ENSCAFG00000016795	ENSCAFT00000026591	2858	2727	909	S	tcG/tcC			0/0	99	0/0	99	0/0	99	0/1	99
4	133673	T	A	3896.54	A	IFIT1	3_prime_UTR_variant	ENSCAFG00000009617	ENSCAFT00000015282	2778							0/1	99	1/1	99	1/1	21	./.	12
4	3516521	C	G	538.8	G	HEATR1	missense_variant	ENSCAFG00000010919	ENSCAFT00000017410	2184	1997	666	A/G	gCg/gGg		tolerated(0.36)	0/0	21	0/0	93	0/0	75	1/1	42
4	5529368	G	T	306.47	T	SLC35F3	3_prime_UTR_variant	ENSCAFG00000011548	ENSCAFT00000018323	1623							0/0	24	0/0	33	0/0	63	1/1	27
4	6341081	G	A	231.15	A	PCNXL2	upstream_gene_variant	ENSCAFG00000011585	ENSCAFT00000018397						162		0/0	60	0/0	78	0/1	99	0/0	39
4	6341081				A		downstream_gene_variant	ENSCAFG00000011566	ENSCAFT00000018358						2121
4	6341081				A		3_prime_UTR_variant	ENSCAFG00000011566	ENSCAFT00000046236	3858
4	6341081				A		downstream_gene_variant	ENSCAFG00000011566	ENSCAFT00000046477						2367
4	8109138	G	T	406.15	T	EGLN1	downstream_gene_variant	ENSCAFG00000011772	ENSCAFT00000037161						819		0/1	99	0/0	99	0/0	99	0/0	99
4	8109138				T	EGLN1	3_prime_UTR_variant	ENSCAFG00000011772	ENSCAFT00000018696	1981
4	9056287	C	T	422.15	T	GALNT2	downstream_gene_variant	ENSCAFG00000012105	ENSCAFT00000019234						1911		0/1	99	0/0	99	0/0	99	0/0	99
4	9056287				T	GALNT2	3_prime_UTR_variant	ENSCAFG00000012105	ENSCAFT00000049454	3501
4	9745895	G	T	7804.27	T	ABCB10	3_prime_UTR_variant	ENSCAFG00000012137	ENSCAFT00000019279	3308							1/1	99	1/1	99	1/1	99	0/0	99
4	11004301	G	A	12722.3	A	BICC1	downstream_gene_variant	ENSCAFG00000012331	ENSCAFT00000019599						227		1/1	99	1/1	99	1/1	90	0/0	93
4	11004301				A	BICC1	3_prime_UTR_variant	ENSCAFG00000012331	ENSCAFT00000019604	3051
4	11970566	C	G	471.06	G	CCDC6	synonymous_variant	ENSCAFG00000012452	ENSCAFT00000019769	1350	1350	450	P	ccG/ccC			./.	12	1/1	18	0/1	20	0/0	21
4	14100787	A	G	2788.15	G	ARID5B	missense_variant	ENSCAFG00000012991	ENSCAFT00000048488	4292	3442	1148	T/A	Aca/Gca		tolerated(0.75)	0/1	99	0/0	99	0/0	99	0/0	99
4	14100787				G	ARID5B	missense_variant	ENSCAFG00000012991	ENSCAFT00000020628	3409	3409	1137	T/A	Aca/Gca
4	14176465	C	T	58.83	T	RTKN2	intron_variant	ENSCAFG00000013018	ENSCAFT00000020673								0/0	15	./.	4	./.	9	0/1	87
4	14176465				T	RTKN2	missense_variant	ENSCAFG00000013018	ENSCAFT00000020670	1588	1588	530	E/K	Gaa/Aaa		tolerated(0.89)
4	19139824	G	C	81.13	C		missense_variant	ENSCAFG00000028988	ENSCAFT00000043846	356	356	119	G/A	gGt/gCt		tolerated(1)	0/1	31	0/1	14	0/1	32	./.	3
4	19139824				C	DNAJC12	intron_variant	ENSCAFG00000013305	ENSCAFT00000021116
4	19139824				C	DNAJC12	intron_variant	ENSCAFG00000013305	ENSCAFT00000049485
4	19139897	A	G	633.55	G		synonymous_variant	ENSCAFG00000028988	ENSCAFT00000043846	375	375	125	P	ccA/ccG			0/0	42	0/0	54	0/1	99	1/1	30
4	19139897				G	DNAJC12	intron_variant	ENSCAFG00000013305	ENSCAFT00000021116
4	19139897				G	DNAJC12	intron_variant	ENSCAFG00000013305	ENSCAFT00000049485
4	20177253	G	A	251.72	A	KIAA1279	synonymous_variant	ENSCAFG00000013808	ENSCAFT00000021920	1939	1077	359	R	agG/agA			0/1	99	0/0	99	0/1	13	./.	2
4	20177253				A	U4	downstream_gene_variant	ENSCAFG00000028002	ENSCAFT00000042285						1872
4	20516584	C	T	1052.15	T	HK1	3_prime_UTR_variant	ENSCAFG00000013917	ENSCAFT00000045763	3396							0/1	99	0/0	99	0/0	99	0/0	99
4	20516584				T	TACR2	downstream_gene_variant	ENSCAFG00000013952	ENSCAFT00000022135						2213
4	20516584				T	HK1	downstream_gene_variant	ENSCAFG00000013917	ENSCAFT00000022120						448
4	23710756	T	C	204.69	C	NUDT13	intron_variant	ENSCAFG00000014604	ENSCAFT00000023196								./.	12	0/1	63	0/1	69	./.	9
4	23710756				C	ECD	3_prime_UTR_variant	ENSCAFG00000014617	ENSCAFT00000023218	4936
4	23734017	C	T	96.16	T	ECD	missense_variant	ENSCAFG00000014617	ENSCAFT00000023218	594	581	194	R/H	cGc/cAc		deleterious(0.01)	0/0	27	0/0	87	0/1	99	0/0	27
4	24528789	C	A	513.15	A	AP3M1	missense_variant	ENSCAFG00000015334	ENSCAFT00000024342	544	544	182	D/Y	Gat/Tat		deleterious(0)	0/0	99	0/1	99	0/0	99	0/0	99
4	27744243	C	T	894.74	T	DLG5	synonymous_variant	ENSCAFG00000015499	ENSCAFT00000050193	497	492	164	R	cgG/cgA			0/0	99	0/0	99	0/0	99	1/1	75
4	27744243				T	DLG5	synonymous_variant	ENSCAFG00000015499	ENSCAFT00000024600	747	747	249	R	cgG/cgA
4	29017336	C	T	4416.74	T	ZMIZ1	missense_variant	ENSCAFG00000015669	ENSCAFT00000024855	1202	1202	401	P/L	cCc/cTc		tolerated(0.16)	0/0	99	0/0	99	0/0	99	1/1	99
4	29080166	A	G	3988.74	G	PPIF	3_prime_UTR_variant	ENSCAFG00000032043	ENSCAFT00000042835	1686							0/0	99	0/0	99	0/0	99	1/1	99
4	34592968	G	A	112.23	A	MMRN2	synonymous_variant	ENSCAFG00000016086	ENSCAFT00000025531	1797	1797	599	R	cgC/cgT			./.	3	./.	9	0/1	25	0/0	15
4	34592968				A	MMRN2	synonymous_variant	ENSCAFG00000016086	ENSCAFT00000025530	1740	1740	580	R	cgC/cgT
4	34592968				A		upstream_gene_variant	ENSCAFG00000024229	ENSCAFT00000037406						4690
4	34870281	C	T	147.85	T		missense_variant	ENSCAFG00000016149	ENSCAFT00000025659	1114	634	212	G/S	Ggc/Agc		deleterious(0.01)	0/0	42	0/0	18	0/1	99	./.	.
4	34870281				T	SYT15	intron_variant	ENSCAFG00000016100	ENSCAFT00000045065
4	35275236	G	C	52.17	C	DCP2	missense_variant	ENSCAFG00000016236	ENSCAFT00000046284	501	274	92	E/Q	Gaa/Caa		tolerated(0.12)	0/0	30	0/0	60	0/1	85	0/0	66
4	35275236				C	DCP2	missense_variant	ENSCAFG00000016236	ENSCAFT00000025759	235	235	79	E/Q	Gaa/Caa		tolerated(0.19)
4	35275236				C	DCP2	missense_variant	ENSCAFG00000016236	ENSCAFT00000042916	223	223	75	E/Q	Gaa/Caa		tolerated(0.18)
4	35338208	G	A	137.15	A	MCC	synonymous_variant	ENSCAFG00000016257	ENSCAFT00000025788	2296	1785	595	I	atC/atT			0/0	36	0/0	78	0/1	99	0/0	51
4	38613502	G	A	730.15	A	CPEB4	missense_variant	ENSCAFG00000016761	ENSCAFT00000045015	2464	1621	541	P/S	Ccc/Tcc		deleterious(0.02)	0/1	99	0/0	99	0/0	99	0/0	99
4	38613502				A	CPEB4	missense_variant	ENSCAFG00000016761	ENSCAFT00000026541	1648	1648	550	P/S	Ccc/Tcc		deleterious(0.02)
4	41165762	T	C	1353.15	C	GABRP	3_prime_UTR_variant	ENSCAFG00000016945	ENSCAFT00000026815	2698							0/0	99	0/0	99	0/0	99	0/1	99
4	43245733	A	T	239.15	T	RARS	synonymous_variant	ENSCAFG00000017058	ENSCAFT00000049422	1278	1278	426	I	atT/atA			0/0	57	0/0	90	0/0	54	0/1	99
4	43245733				T	RARS	synonymous_variant	ENSCAFG00000017058	ENSCAFT00000027027	1278	1278	426	I	atT/atA
4	52731004	C	T	327.15	T	NIPAL4	downstream_gene_variant	ENSCAFG00000017367	ENSCAFT00000027510						4030		0/0	69	0/0	99	0/1	99	0/0	99
4	52731004				T	ADAM19	3_prime_UTR_variant	ENSCAFG00000017357	ENSCAFT00000027507	4069
4	52735673	C	T	3144.15	T	NIPAL4	3_prime_UTR_variant	ENSCAFG00000017367	ENSCAFT00000027510	2514							0/0	99	0/0	99	0/1	99	0/0	99
4	52735673				T	ADAM19	downstream_gene_variant	ENSCAFG00000017357	ENSCAFT00000027507						2322
4	52735873	C	T	1410.15	T	NIPAL4	3_prime_UTR_variant	ENSCAFG00000017367	ENSCAFT00000027510	2314							0/1	99	0/0	99	0/0	99	0/0	99
4	52735873				T	ADAM19	downstream_gene_variant	ENSCAFG00000017357	ENSCAFT00000027507						2522
4	52769825	C	T	82.13	T	CYFIP2	3_prime_UTR_variant	ENSCAFG00000017484	ENSCAFT00000027770	6696							./.	3	0/0	30	./.	6	0/1	30
4	55661409	A	C	908.15	C	FAM114A2	missense_variant	ENSCAFG00000017653	ENSCAFT00000027999	1479	1465	489	I/L	Atc/Ctc		tolerated(0.09)	0/1	99	0/0	99	0/0	99	0/0	99
4	57764003	A	G	205.06	G	FAT2	missense_variant	ENSCAFG00000017871	ENSCAFT00000049559	676	508	170	I/V	Atc/Gtc		tolerated(0.41)	./.	12	0/0	99	0/1	99	./.	.
4	57764003				G	FAT2	missense_variant	ENSCAFG00000017871	ENSCAFT00000028363	508	508	170	I/V	Atc/Gtc		tolerated(0.45)
4	58003797	A	G	288.15	G	GM2A	3_prime_UTR_variant	ENSCAFG00000017907	ENSCAFT00000028421	1053							0/0	99	0/1	99	0/0	99	0/0	99
4	58003797				G	SLC36A3	intron_variant	ENSCAFG00000017902	ENSCAFT00000028417
4	58450698	C	T	722.15	T	DCTN4	3_prime_UTR_variant	ENSCAFG00000018072	ENSCAFT00000028722	1456							0/0	99	0/0	99	0/1	99	0/0	99
4	58450698				T	DCTN4	downstream_gene_variant	ENSCAFG00000018072	ENSCAFT00000035516						52
4	58450901	A	C	3909.15	C	DCTN4	3_prime_UTR_variant	ENSCAFG00000018072	ENSCAFT00000028722	1659							0/0	99	0/1	99	0/0	99	0/0	99
4	58450901				C	DCTN4	downstream_gene_variant	ENSCAFG00000018072	ENSCAFT00000035516						255
4	58531810	C	G	37.94	G	SYNPO	missense_variant	ENSCAFG00000018091	ENSCAFT00000028748	342	77	26	G/A	gGg/gCg		tolerated(0.07)	0/1	32	./.	6	0/0	63	./.	6
4	58947313	G	A	496.25	A	PDGFRB	missense_variant	ENSCAFG00000018214	ENSCAFT00000000773	1303	1303	435	E/K	Gag/Aag		tolerated(0.92)	0/0	48	0/0	60	0/1	99	./.	12
4	58962371	G	T	175.15	T	PDGFRB	3_prime_UTR_variant	ENSCAFG00000018214	ENSCAFT00000000773	3936							0/1	99	0/0	99	0/0	99	0/0	99
4	59184204	G	A	755.21	A	PPARGC1B	synonymous_variant	ENSCAFG00000018275	ENSCAFT00000029039	2109	2109	703	H	caC/caT			0/0	15	0/0	63	0/1	99	0/0	21
4	59377194	G	A	1299.15	A	ARHGEF37	synonymous_variant	ENSCAFG00000018281	ENSCAFT00000029042	1077	567	189	D	gaC/gaT			0/0	99	0/0	99	0/1	99	0/0	99
4	59593784	G	T	100.15	T	PCYOX1L	synonymous_variant	ENSCAFG00000018299	ENSCAFT00000029069	455	240	80	G	ggC/ggA			0/1	99	0/0	63	0/0	45	0/0	99
4	59797871	C	T	3810.16	T	ABLIM3	5_prime_UTR_variant	ENSCAFG00000018323	ENSCAFT00000029119	629							0/0	99	0/0	99	0/1	99	0/0	99
4	59849051	C	T	73.23	T	U6	upstream_gene_variant	ENSCAFG00000027689	ENSCAFT00000041972						3192		0/0	36	0/0	27	0/1	33	0/0	15
4	59849051				T	SH3TC2	synonymous_variant	ENSCAFG00000018334	ENSCAFT00000029130	24	24	8	P	ccC/ccT
4	60601813	G	A	188.58	A	ESM1	3_prime_UTR_variant	ENSCAFG00000018381	ENSCAFT00000029200	2383							0/1	99	./.	6	0/0	99	./.	9
4	62331646	G	A	102.68	A	ITGA1	splice_region_variant	ENSCAFG00000018439	ENSCAFT00000029284	1455	1455	485	I	atC/atT			./.	12	0/1	24	0/0	75	./.	6
4	62331646				A	ITGA1	splice_region_variant	ENSCAFG00000018439	ENSCAFT00000044970	1950	1542	514	I	atC/atT
4	66549112	G	A	268.15	A	C5orf28	3_prime_UTR_variant	ENSCAFG00000031067	ENSCAFT00000047134	1557							0/0	30	0/0	39	0/0	54	0/1	99
4	68451369	G	C	275.82	C	C7	3_prime_UTR_variant	ENSCAFG00000018608	ENSCAFT00000029541	3204							./.	3	./.	.	0/0	24	0/1	99
4	69637457	C	A	533.15	A	DAB2	missense_variant	ENSCAFG00000018622	ENSCAFT00000029566	1203	1203	401	N/K	aaC/aaA		deleterious(0.01)	0/0	99	0/0	99	0/0	99	0/1	99
4	69637457				A	DAB2	missense_variant	ENSCAFG00000018622	ENSCAFT00000050016	1281	1281	427	N/K	aaC/aaA		deleterious(0.01)
4	70000955	G	C	340.15	C	RICTOR	missense_variant	ENSCAFG00000018637	ENSCAFT00000029595	5270	4400	1467	C/S	tGc/tCc		deleterious(0)	0/1	99	0/0	99	0/0	99	0/0	69
4	70000955				C	RICTOR	missense_variant	ENSCAFG00000018637	ENSCAFT00000029593	4550	4550	1517	C/S	tGc/tCc		deleterious(0)
4	70392078	A	C	3879.15	C	EGFLAM	downstream_gene_variant	ENSCAFG00000018666	ENSCAFT00000036261						597		0/0	99	0/0	99	0/0	99	0/1	99
4	70392078				C	EGFLAM	3_prime_UTR_variant	ENSCAFG00000018666	ENSCAFT00000029634	4324
4	70427779	G	A	2507.15	A	EGFLAM	synonymous_variant	ENSCAFG00000018666	ENSCAFT00000036261	1647	1647	549	G	ggC/ggT			0/0	99	0/0	99	0/0	99	0/1	99
4	70427779				A	EGFLAM	synonymous_variant	ENSCAFG00000018666	ENSCAFT00000049741	1926	1926	642	G	ggC/ggT
4	70427779				A	EGFLAM	synonymous_variant	ENSCAFG00000018666	ENSCAFT00000029634	2638	1965	655	G	ggC/ggT
4	71566785	C	G	505.75	G		missense_variant	ENSCAFG00000018685	ENSCAFT00000029667	10207	6164	2055	P/R	cCt/cGt		deleterious(0.05)	0/0	45	1/1	42	0/0	33	0/0	24
4	71936938	G	A	1078.82	A		upstream_gene_variant	ENSCAFG00000029561	ENSCAFT00000046207						2077		0/0	15	1/1	84	0/0	60	0/0	27
4	71936938				A	GLAST	3_prime_UTR_variant	ENSCAFG00000018704	ENSCAFT00000029693	3180
4	71936940	A	G	1010.82	G		upstream_gene_variant	ENSCAFG00000029561	ENSCAFT00000046207						2075		0/0	15	1/1	78	0/0	60	0/0	27
4	71936940				G	GLAST	3_prime_UTR_variant	ENSCAFG00000018704	ENSCAFT00000029693	3178
4	71937376	G	T	909.94	T		upstream_gene_variant	ENSCAFG00000029561	ENSCAFT00000046207						1639		./.	12	1/1	72	0/0	33	0/0	18
4	71937376				T	GLAST	3_prime_UTR_variant	ENSCAFG00000018704	ENSCAFT00000029693	2742
4	72076876	T	C	52.7	C		synonymous_variant	ENSCAFG00000029561	ENSCAFT00000046207	450	450	150	I	atT/atC			0/1	25	0/1	19	./.	3	./.	.
4	72077014	T	G	91.19	G		synonymous_variant	ENSCAFG00000029561	ENSCAFT00000046207	588	588	196	L	ctT/ctG			0/0	27	0/1	99	0/0	39	./.	12
4	72077041	T	C	116.84	C		synonymous_variant	ENSCAFG00000029561	ENSCAFT00000046207	615	615	205	T	acT/acC			0/1	95	0/1	57	./.	12	./.	9
4	72077077	G	A	162.39	A		synonymous_variant	ENSCAFG00000029561	ENSCAFT00000046207	651	651	217	G	ggG/ggA			0/1	99	0/1	26	./.	3	0/1	63
4	72077176	C	G	747.05	G		synonymous_variant	ENSCAFG00000029561	ENSCAFT00000046207	750	750	250	L	ctC/ctG			0/1	99	./.	3	0/1	99	0/1	99
4	72077195	T	C	90.15	C		missense_variant	ENSCAFG00000029561	ENSCAFT00000046207	769	769	257	F/L	Ttc/Ctc		tolerated(0.1)	./.	4	0/1	99	0/0	99	0/0	47
4	73375698	G	A	119.15	A	DNAJC21	upstream_gene_variant	ENSCAFG00000018794	ENSCAFT00000029836						3617		0/0	99	0/0	99	0/1	99	0/0	81
4	73375698				A	BRIX1	synonymous_variant	ENSCAFG00000018797	ENSCAFT00000029840	2045	798	266	I	atC/atT
5	4658174	C	T	1943.15	T	ST14	missense_variant	ENSCAFG00000009993	ENSCAFT00000015905	1643	1643	548	R/H	cGc/cAc		deleterious(0.04)	0/0	99	0/0	99	0/1	99	0/0	99
5	4658174				T	ST14	missense_variant	ENSCAFG00000009993	ENSCAFT00000043006	1637	1634	545	R/H	cGc/cAc		deleterious(0.03)
5	5680049	G	A	910.76	A	ARHGAP32	missense_variant	ENSCAFG00000010235	ENSCAFT00000047969	3024	2281	761	A/T	Gcc/Acc		deleterious(0.04)	0/1	99	0/0	99	0/0	99	0/1	99
5	5680049				A	ARHGAP32	missense_variant	ENSCAFG00000010235	ENSCAFT00000016261	2371	2371	791	A/T	Gcc/Acc		deleterious(0.04)
5	5681654	G	C	443.15	C	ARHGAP32	missense_variant	ENSCAFG00000010235	ENSCAFT00000047969	3954	3211	1071	D/H	Gat/Cat		deleterious(0.01)	0/0	99	0/0	99	0/1	99	0/0	99
5	5681654				C	ARHGAP32	missense_variant	ENSCAFG00000010235	ENSCAFT00000016261	3301	3301	1101	D/H	Gat/Cat		deleterious(0.01)
5	5883121	G	A	368.15	A	FLI1	synonymous_variant	ENSCAFG00000032412	ENSCAFT00000046747	447	447	149	Y	taC/taT			0/1	99	0/0	99	0/0	99	0/0	72
5	6166703	A	G	2613.15	G	ETS1	missense_variant	ENSCAFG00000010304	ENSCAFT00000048169	1402	917	306	D/G	gAc/gGc		tolerated(0.16)	0/0	99	0/0	99	0/1	99	0/0	99
5	6166703				G	ETS1	missense_variant	ENSCAFG00000010304	ENSCAFT00000016398	1049	1049	350	D/G	gAc/gGc		tolerated(0.12)
5	8590450	G	A	415.15	A	HYLS1	synonymous_variant	ENSCAFG00000028610	ENSCAFT00000044308	471	471	157	D	gaC/gaT			0/0	60	0/0	36	0/1	99	0/0	39
5	8590450				A	DDX25	upstream_gene_variant	ENSCAFG00000010519	ENSCAFT00000016722						4962
5	8590450				A	PUS3	intron_variant	ENSCAFG00000010534	ENSCAFT00000016731
5	8878262	T	C	53.26	C	CHEK1	3_prime_UTR_variant	ENSCAFG00000010551	ENSCAFT00000016788	2610							./.	9	0/1	58	./.	2	0/1	28
5	8917224	A	G	2469.15	G	STT3A	3_prime_UTR_variant	ENSCAFG00000010780	ENSCAFT00000017246	2611							0/0	99	0/0	99	0/0	99	0/1	99
5	9424373	T	C	145.12	C	CCDC15	3_prime_UTR_variant	ENSCAFG00000010996	ENSCAFT00000045749	4265							0/1	71	./.	3	0/1	69	./.	6
5	9424373				C	CCDC15	downstream_gene_variant	ENSCAFG00000010996	ENSCAFT00000017486						1688
5	9424373				C	CCDC15	downstream_gene_variant	ENSCAFG00000010996	ENSCAFT00000017503						1682
5	9424374	T	C	84.13	C	CCDC15	3_prime_UTR_variant	ENSCAFG00000010996	ENSCAFT00000045749	4264							0/1	64	./.	3	0/0	15	./.	6
5	9424374				C	CCDC15	downstream_gene_variant	ENSCAFG00000010996	ENSCAFT00000017486						1687
5	9424374				C	CCDC15	downstream_gene_variant	ENSCAFG00000010996	ENSCAFT00000017503						1681
5	9783937	C	G	1654.03	G	TBRG1	synonymous_variant	ENSCAFG00000011215	ENSCAFT00000017827	9	9	3	L	ctG/ctC			0/1	99	1/1	51	0/1	99	0/0	63
5	9783937				G	PANX3	downstream_gene_variant	ENSCAFG00000011230	ENSCAFT00000017849						4010
5	12559780	C	T	457.15	T	SORL1	missense_variant	ENSCAFG00000011745	ENSCAFT00000047063	2728	2728	910	V/M	Gtg/Atg		deleterious(0)	0/1	99	0/0	51	0/0	99	0/0	99
5	12559780				T	SORL1	missense_variant	ENSCAFG00000011745	ENSCAFT00000018722	2728	2728	910	V/M	Gtg/Atg		deleterious(0)
5	12559780				T	SORL1	missense_variant	ENSCAFG00000011745	ENSCAFT00000049040	2996	2728	910	V/M	Gtg/Atg		deleterious(0)
5	13519598	C	G	9915.52	G	U6	downstream_gene_variant	ENSCAFG00000020878	ENSCAFT00000032985						4665		0/1	99	1/1	99	0/0	99	0/0	99
5	13519598				G	ARHGEF12	3_prime_UTR_variant	ENSCAFG00000011934	ENSCAFT00000018981	8348
5	13577206	C	T	2651.15	T	ARHGEF12	missense_variant	ENSCAFG00000011934	ENSCAFT00000018981	668	556	186	E/K	Gag/Aag		tolerated(0.29)	0/0	99	0/0	99	0/1	99	0/0	99
5	14276512	C	T	7889.74	T	PRR1	synonymous_variant	ENSCAFG00000012012	ENSCAFT00000019073	552	282	94	R	cgC/cgT			0/0	99	1/1	99	0/0	99	0/0	99
5	14289120	G	T	6275.52	T	PRR1	3_prime_UTR_variant	ENSCAFG00000012012	ENSCAFT00000019073	1846							0/1	99	1/1	99	0/0	99	0/0	99
5	14785601	G	A	259.15	A	VPS11	synonymous_variant	ENSCAFG00000012366	ENSCAFT00000019646	447	447	149	H	caC/caT			0/1	99	0/0	75	0/0	78	0/0	90
5	14797605	C	A	603.15	A	HYOU1	missense_variant	ENSCAFG00000012126	ENSCAFT00000019330	506	361	121	P/T	Cca/Aca		deleterious(0)	0/1	99	0/0	99	0/0	99	0/0	99
5	14805985	G	A	1554.15	A	HYOU1	missense_variant	ENSCAFG00000012126	ENSCAFT00000019330	2813	2668	890	D/N	Gac/Aac		deleterious(0.01)	0/0	99	0/0	99	0/0	99	0/1	99
5	14868922	C	T	623.36	T	UPK2	synonymous_variant	ENSCAFG00000012319	ENSCAFT00000046992	411	411	137	T	acG/acA			0/1	99	0/0	99	0/0	99	./.	9
5	14868922				T	UPK2	synonymous_variant	ENSCAFG00000012319	ENSCAFT00000019562	455	390	130	T	acG/acA
5	15496802	G	A	221.15	A	AMICA1	synonymous_variant	ENSCAFG00000012813	ENSCAFT00000020325	378	378	126	V	gtG/gtA			0/0	45	0/0	39	0/1	99	0/0	33
5	15496802				A	AMICA1	synonymous_variant	ENSCAFG00000012813	ENSCAFT00000049251	1066	453	151	V	gtG/gtA
5	15573508	C	T	307.25	T	TMPRSS4	3_prime_UTR_variant	ENSCAFG00000012829	ENSCAFT00000045682	3262							0/0	45	0/0	39	0/0	66	0/1	99
5	15573508				T	TMPRSS4	downstream_gene_variant	ENSCAFG00000012829	ENSCAFT00000020361						3234
5	15574636	C	T	2645.15	T	TMPRSS4	3_prime_UTR_variant	ENSCAFG00000012829	ENSCAFT00000045682	2134							0/0	99	0/0	99	0/0	99	0/1	99
5	15574636				T	TMPRSS4	downstream_gene_variant	ENSCAFG00000012829	ENSCAFT00000020361						2106
5	15584198	G	T	68.2	T	TMPRSS4	synonymous_variant	ENSCAFG00000012829	ENSCAFT00000020361	474	474	158	P	ccC/ccA			0/1	99	0/0	84	0/0	99	0/0	36
5	15590165	G	A	1262.15	A	TMPRSS4	synonymous_variant	ENSCAFG00000012829	ENSCAFT00000020361	162	162	54	I	atC/atT			0/0	99	0/0	99	0/0	99	0/1	99
5	15753519	CA	C	15377.9	-	TMPRSS13	downstream_gene_variant	ENSCAFG00000012845	ENSCAFT00000020376						810		1/1	99	1/1	99	0/1	99	0/0	99
5	15753519				-	TMPRSS13	frameshift_variant	ENSCAFG00000012845	ENSCAFT00000049112	2070	1525	509
5	16397708	G	A	250.15	A	TAGLN	upstream_gene_variant	ENSCAFG00000013162	ENSCAFT00000037932						1521		0/0	99	0/0	84	0/0	99	0/1	99
5	16397708				A	SIDT2	downstream_gene_variant	ENSCAFG00000013202	ENSCAFT00000020974						1169
5	16397708				A	SIDT2	3_prime_UTR_variant	ENSCAFG00000013202	ENSCAFT00000046796	3360
5	19802353	C	A	163.4	A	ANKK1	missense_variant	ENSCAFG00000013898	ENSCAFT00000022051	2326	2023	675	V/F	Gtc/Ttc		deleterious(0)	0/1	99	./.	.	0/0	51	./.	6
5	21310377	G	A	119.15	A	ALG9	downstream_gene_variant	ENSCAFG00000014120	ENSCAFT00000022433						2397		0/0	47	0/0	99	0/0	90	0/1	99
5	21310377				A	ALG9	3_prime_UTR_variant	ENSCAFG00000014120	ENSCAFT00000044659	4507
5	21396369	C	T	649.15	T	SIK2	synonymous_variant	ENSCAFG00000014202	ENSCAFT00000022548	450	450	150	L	ctG/ctA			0/0	72	0/0	99	0/0	55	0/1	99
5	21508948	G	A	71.33	A	LAYN	3_prime_UTR_variant	ENSCAFG00000030623	ENSCAFT00000045230	4590							0/1	34	0/1	59	./.	3	./.	.
5	22625167	G	T	166.62	T		missense_variant	ENSCAFG00000030803	ENSCAFT00000045284	662	662	221	P/H	cCc/cAc		deleterious(0)	0/1	75	0/1	99	0/0	30	./.	12
5	22625167				T	RDX	intron_variant	ENSCAFG00000014273	ENSCAFT00000022709
5	22625478	G	C	71.55	C		missense_variant	ENSCAFG00000030803	ENSCAFT00000045284	351	351	117	N/K	aaC/aaG		tolerated(0.09)	0/1	64	0/1	35	0/0	27	./.	3
5	22625478				C	RDX	intron_variant	ENSCAFG00000014273	ENSCAFT00000022709
5	22625534	T	G	45.34	G		missense_variant	ENSCAFG00000030803	ENSCAFT00000045284	295	295	99	K/Q	Aaa/Caa		tolerated(1)	0/1	76	0/0	99	0/0	72	0/0	33
5	22625534				G	RDX	intron_variant	ENSCAFG00000014273	ENSCAFT00000022709
5	24248435	C	T	48.15	T	ATM	missense_variant	ENSCAFG00000014454	ENSCAFT00000023032	4256	3817	1273	A/T	Gct/Act		deleterious(0.01)	0/0	33	0/0	42	0/0	33	0/1	81
5	24248435				T	ATM	missense_variant	ENSCAFG00000014454	ENSCAFT00000048574	4256	3817	1273	A/T	Gct/Act		deleterious(0.01)
5	26173321	C	G	2209.74	G	AASDHPPT	3_prime_UTR_variant	ENSCAFG00000014775	ENSCAFT00000023457	2427							0/0	99	1/1	99	0/0	99	0/0	99
5	26256173	C	T	2300.99	T	MSANTD4	3_prime_UTR_variant	ENSCAFG00000031997	ENSCAFT00000050144	1414							1/1	84	0/0	93	1/1	90	0/0	90
5	28854072	C	T	612.56	T	MMP13	synonymous_variant	ENSCAFG00000015043	ENSCAFT00000023886	342	342	114	D	gaC/gaT			0/1	99	0/0	72	0/0	99	0/0	33
5	30539957	T	C	64.91	C	MYBBP1A	upstream_gene_variant	ENSCAFG00000015266	ENSCAFT00000044070						1114		0/0	66	0/1	68	0/0	48	0/1	33
5	30539957				C	GGT6	3_prime_UTR_variant	ENSCAFG00000015282	ENSCAFT00000024272	2528
5	30539957				C	MYBBP1A	upstream_gene_variant	ENSCAFG00000015266	ENSCAFT00000049326						3394
5	30539957				C	MYBBP1A	upstream_gene_variant	ENSCAFG00000015266	ENSCAFT00000024251						1191
5	30540019	T	C	70.07	C	MYBBP1A	upstream_gene_variant	ENSCAFG00000015266	ENSCAFT00000044070						1176		0/0	15	./.	3	0/1	24	./.	3
5	30540019				C	GGT6	3_prime_UTR_variant	ENSCAFG00000015282	ENSCAFT00000024272	2466
5	30540019				C	MYBBP1A	upstream_gene_variant	ENSCAFG00000015266	ENSCAFT00000049326						3456
5	30540019				C	MYBBP1A	upstream_gene_variant	ENSCAFG00000015266	ENSCAFT00000024251						1253
5	30540945	G	A	3033.15	A	MYBBP1A	upstream_gene_variant	ENSCAFG00000015266	ENSCAFT00000044070						2102		0/1	99	0/0	99	0/0	99	0/0	99
5	30540945				A	GGT6	synonymous_variant	ENSCAFG00000015282	ENSCAFT00000024272	1540	1419	473	C	tgC/tgT
5	30540945				A	MYBBP1A	upstream_gene_variant	ENSCAFG00000015266	ENSCAFT00000049326						4382
5	30540945				A	MYBBP1A	upstream_gene_variant	ENSCAFG00000015266	ENSCAFT00000024251						2179
5	30541685	G	A	4376.15	A	MYBBP1A	upstream_gene_variant	ENSCAFG00000015266	ENSCAFT00000044070						2842		0/0	99	0/0	99	0/0	99	0/1	99
5	30541685				A	GGT6	synonymous_variant	ENSCAFG00000015282	ENSCAFT00000024272	800	679	227	L	Ctg/Ttg
5	30541685				A	MYBBP1A	upstream_gene_variant	ENSCAFG00000015266	ENSCAFT00000024251						2919
5	30541848	C	T	3009.15	T	MYBBP1A	upstream_gene_variant	ENSCAFG00000015266	ENSCAFT00000044070						3005		0/1	99	0/0	99	0/0	99	0/0	99
5	30541848				T	GGT6	synonymous_variant	ENSCAFG00000015282	ENSCAFT00000024272	637	516	172	S	tcG/tcA
5	30541848				T	MYBBP1A	upstream_gene_variant	ENSCAFG00000015266	ENSCAFT00000024251						3082
5	30577162	G	A	735.15	A	SMTNL2	missense_variant	ENSCAFG00000015292	ENSCAFT00000024286	1615	1079	360	R/H	cGc/cAc		tolerated(0.06)	0/0	99	0/0	99	0/0	99	0/1	99
5	30807475	C	T	1538.15	T		missense_variant	ENSCAFG00000015453	ENSCAFT00000024513	1700	1331	444	P/L	cCg/cTg		tolerated(0.31)	0/1	99	0/0	99	0/0	99	0/0	66
5	31349327	G	C	349.15	C	C1QBP	upstream_gene_variant	ENSCAFG00000015542	ENSCAFT00000024628						4797		0/1	99	0/0	99	0/0	99	0/0	99
5	31349327				C	DHX33	3_prime_UTR_variant	ENSCAFG00000015535	ENSCAFT00000024626	2218
5	31649698	T	A	135.26	A	CAMTA2	missense_variant	ENSCAFG00000015674	ENSCAFT00000046045	2411	1831	611	Y/N	Tac/Aac		deleterious(0)	0/1	99	0/0	39	0/0	72	./.	12
5	31649698				A	CAMTA2	missense_variant	ENSCAFG00000015674	ENSCAFT00000024849	1762	1762	588	Y/N	Tac/Aac		deleterious(0)
5	31708193	C	T	1965.52	T	MINK	3_prime_UTR_variant	ENSCAFG00000015747	ENSCAFT00000024956	3860							0/0	99	1/1	96	0/1	99	0/0	78
5	31708193				T	CHRNE	downstream_gene_variant	ENSCAFG00000015838	ENSCAFT00000025084						679
5	32168993	G	A	214.99	A	DLG4	synonymous_variant	ENSCAFG00000015995	ENSCAFT00000025383	1338	1338	446	H	caC/caT			0/0	18	./.	.	0/1	38	./.	3
5	32297811	C	T	180.48	T	ACAP1	synonymous_variant	ENSCAFG00000016225	ENSCAFT00000025778	162	162	54	A	gcC/gcT			0/1	99	./.	6	0/0	15	./.	.
5	32297811				T	ACADVL	intron_variant	ENSCAFG00000016016	ENSCAFT00000042985
5	32384989	T	C	209.17	C	CHRNB1	downstream_gene_variant	ENSCAFG00000016315	ENSCAFT00000025890						2060		0/1	53	0/0	20	0/0	99	0/0	60
5	32384989				C	ZBTB4	3_prime_UTR_variant	ENSCAFG00000016341	ENSCAFT00000025918	5129
5	32500506	C	T	558.15	T	EIF4A1	3_prime_UTR_variant	ENSCAFG00000016632	ENSCAFT00000026357	1430							0/1	99	0/0	99	0/0	99	0/0	99
5	32500506				T	SNORA48	downstream_gene_variant	ENSCAFG00000026046	ENSCAFT00000040329						4159
5	32500506				T	SENP3	downstream_gene_variant	ENSCAFG00000016628	ENSCAFT00000026341						3259
5	32500506				T	CD68	upstream_gene_variant	ENSCAFG00000016641	ENSCAFT00000026361						918
5	32500506				T	SNORA67	downstream_gene_variant	ENSCAFG00000025953	ENSCAFT00000040236						601
5	32500506				T	MPDU1	upstream_gene_variant	ENSCAFG00000016651	ENSCAFT00000026380						4199
5	32500506				T	SNORA48	downstream_gene_variant	ENSCAFG00000030098	ENSCAFT00000045606						3339
5	32500506				T	CD68	upstream_gene_variant	ENSCAFG00000016641	ENSCAFT00000036024						976
5	32500506				T	WRAP53	intron_variant	ENSCAFG00000016722	ENSCAFT00000026478
5	32500506				T	SNORD10	downstream_gene_variant	ENSCAFG00000027886	ENSCAFT00000042169						1762
5	32507414	T	C	2755.74	C	CD68	downstream_gene_variant	ENSCAFG00000016641	ENSCAFT00000026361						4285		1/1	99	0/0	99	0/0	99	0/0	99
5	32507414				C	FXR2	downstream_gene_variant	ENSCAFG00000016685	ENSCAFT00000026425						4018
5	32507414				C	SOX15	downstream_gene_variant	ENSCAFG00000016662	ENSCAFT00000026387						660
5	32507414				C	MPDU1	3_prime_UTR_variant	ENSCAFG00000016651	ENSCAFT00000026380	869
5	32507414				C	CD68	downstream_gene_variant	ENSCAFG00000016641	ENSCAFT00000036024						4285
5	32507414				C	WRAP53	intron_variant	ENSCAFG00000016722	ENSCAFT00000026478
5	32513001	G	A	4377.76	A	FXR2	synonymous_variant	ENSCAFG00000016685	ENSCAFT00000026425	1191	1191	397	S	agC/agT			0/0	99	0/0	99	0/1	99	0/1	99
5	32513001				A	SOX15	upstream_gene_variant	ENSCAFG00000016662	ENSCAFT00000026387						3668
5	32513001				A	MPDU1	downstream_gene_variant	ENSCAFG00000016651	ENSCAFT00000026380						4507
5	32513001				A	WRAP53	intron_variant	ENSCAFG00000016722	ENSCAFT00000026478
5	32703214	G	A	104.17	A	KDM6B	synonymous_variant	ENSCAFG00000016817	ENSCAFT00000026627	762	762	254	P	ccG/ccA			0/0	36	0/0	21	0/1	99	0/0	24
5	33040509	T	G	165.15	G	CTC1	synonymous_variant	ENSCAFG00000017015	ENSCAFT00000026946	1255	1255	419	R	Agg/Cgg			0/1	99	0/0	69	0/0	99	0/0	99
5	33041605	C	T	40.25	T	CTC1	missense_variant	ENSCAFG00000017015	ENSCAFT00000026946	802	802	268	A/T	Gcc/Acc		tolerated(0.08)	0/1	73	0/0	51	0/0	57	./.	12
5	33079361	A	G	113.4	G	PFAS	3_prime_UTR_variant	ENSCAFG00000017021	ENSCAFT00000026959	7151							./.	3	0/1	36	0/1	35	0/1	27
5	33100735	G	C	300.15	C	ARHGEF15	missense_variant	ENSCAFG00000017057	ENSCAFT00000027013	601	449	150	R/T	aGa/aCa		deleterious(0)	0/1	99	0/0	30	0/0	99	0/0	87
5	33103525	G	A	155.28	A	ARHGEF15	missense_variant	ENSCAFG00000017057	ENSCAFT00000027013	1363	1211	404	R/Q	cGa/cAa		tolerated(0.21)	0/0	30	./.	12	0/1	99	0/0	18
5	33500614	G	A	34.62	A	PIK3R6	synonymous_variant	ENSCAFG00000017382	ENSCAFT00000027538	894	609	203	D	gaC/gaT			0/1	67	./.	9	0/0	21	./.	12
5	36061060	C	G	224.15	G	DNAH9	downstream_gene_variant	ENSCAFG00000017769	ENSCAFT00000028231						2364		0/0	72	0/0	54	0/0	39	0/1	99
5	36061060				G	ZNF18	3_prime_UTR_variant	ENSCAFG00000017843	ENSCAFT00000028307	2291
5	37967273	C	T	1470.15	T	COX10	missense_variant	ENSCAFG00000017899	ENSCAFT00000028403	764	764	255	T/M	aCg/aTg		deleterious(0)	0/0	99	0/1	99	0/0	99	0/0	99
5	40833992	C	G	2748.74	G	MAPK7	missense_variant	ENSCAFG00000018202	ENSCAFT00000028918	1280	1280	427	G/A	gGg/gCg		tolerated(0.44)	0/0	99	0/0	99	1/1	99	0/0	99
5	40833992				G	MFAP4	downstream_gene_variant	ENSCAFG00000030269	ENSCAFT00000048232						1285
5	41681433	G	A	1178.15	A	SREBF1	synonymous_variant	ENSCAFG00000018436	ENSCAFT00000043059	1473	1473	491	S	tcG/tcA			0/0	99	0/0	99	0/0	99	0/1	99
5	41681433				A	cfa-mir-33b	upstream_gene_variant	ENSCAFG00000025628	ENSCAFT00000039911						3732
5	41681433				A	SREBF1	synonymous_variant	ENSCAFG00000018436	ENSCAFT00000029276	1374	1374	458	S	tcG/tcA
5	41698346	C	T	453.15	T	RAI1	missense_variant	ENSCAFG00000018437	ENSCAFT00000029281	5720	5218	1740	A/T	Gct/Act		tolerated(0.57)	0/1	99	0/0	81	0/0	99	0/0	81
5	41698346				T	RAI1	missense_variant	ENSCAFG00000018437	ENSCAFT00000048471	5134	5134	1712	A/T	Gct/Act		tolerated(0.32)
5	41701188	C	T	280.15	T	RAI1	synonymous_variant	ENSCAFG00000018437	ENSCAFT00000029281	2878	2376	792	P	ccG/ccA			0/0	99	0/0	99	0/0	99	0/1	99
5	41701188				T	RAI1	synonymous_variant	ENSCAFG00000018437	ENSCAFT00000048471	2292	2292	764	P	ccG/ccA
5	42246609	C	T	4326.15	T	MPRIP	missense_variant	ENSCAFG00000018501	ENSCAFT00000029387	1379	1379	460	R/H	cGt/cAt		tolerated(0.1)	0/0	99	0/0	99	0/0	99	0/1	99
5	42246609				T	MPRIP	missense_variant	ENSCAFG00000018501	ENSCAFT00000029398	1736	1493	498	R/H	cGt/cAt		tolerated(0.09)
5	42859650	A	T	754.6	T	KCNJ12	missense_variant	ENSCAFG00000018532	ENSCAFT00000045066	1083	499	167	I/L	Ata/Tta		tolerated(0.06)	1/1	36	1/1	24	0/0	48	0/0	42
5	42859650				T	KCNJ12	missense_variant	ENSCAFG00000018532	ENSCAFT00000029418	499	499	167	I/L	Ata/Tta		tolerated(0.07)
5	43187255	C	T	992.74	T	SERBP1	3_prime_UTR_variant	ENSCAFG00000018538	ENSCAFT00000029427	4037							0/0	63	0/0	99	1/1	78	0/0	57
5	43520834	C	A	226.15	A	SLC35D1	3_prime_UTR_variant	ENSCAFG00000028904	ENSCAFT00000049817	5638							0/1	99	0/0	99	0/0	99	0/0	99
5	45568582	A	G	38.36	G	CACHD1	missense_variant	ENSCAFG00000018621	ENSCAFT00000029569	2999	2999	1000	F/S	tTc/tCc		deleterious(0)	./.	9	0/0	21	0/0	36	0/1	30
5	47312457	C	G	32.15	G	ATG4C	missense_variant	ENSCAFG00000018720	ENSCAFT00000029726	1342	433	145	D/H	Gac/Cac		deleterious(0.01)	0/1	65	0/0	99	0/0	72	0/0	99
5	47314715	G	A	43.16	A	ATG4C	synonymous_variant	ENSCAFG00000018720	ENSCAFT00000029726	1285	376	126	L	Ctg/Ttg			0/0	21	0/0	54	0/1	76	0/0	63
5	47359393	G	C	151.97	C	ATG4C	5_prime_UTR_variant	ENSCAFG00000018720	ENSCAFT00000029726	564							./.	.	0/0	21	0/0	24	0/1	84
5	47603538	G	C	147.15	C	DOCK7	missense_variant	ENSCAFG00000018765	ENSCAFT00000029816	4029	4029	1343	E/D	gaG/gaC		tolerated(0.15)	0/0	99	0/0	99	0/1	99	0/0	96
5	47603538				C	DOCK7	missense_variant	ENSCAFG00000018765	ENSCAFT00000045273	3985	3699	1233	E/D	gaG/gaC		tolerated(0.13)
5	48194168	C	T	2400.15	T	INADL	missense_variant	ENSCAFG00000018822	ENSCAFT00000029899	1913	1913	638	R/Q	cGa/cAa		tolerated(0.18)	0/0	99	0/0	99	0/1	99	0/0	99
5	48194168				T	INADL	missense_variant	ENSCAFG00000018822	ENSCAFT00000049740	1948	1913	638	R/Q	cGa/cAa		tolerated(0.18)
5	54378552	G	T	919.15	T	TTC22	synonymous_variant	ENSCAFG00000018999	ENSCAFT00000030169	1137	1137	379	V	gtG/gtT			0/1	99	0/0	99	0/0	99	0/0	99
5	54378552				T	TTC22	synonymous_variant	ENSCAFG00000018999	ENSCAFT00000043914	1396	1137	379	V	gtG/gtT
5	54379442	G	A	3227.04	A	TTC22	downstream_gene_variant	ENSCAFG00000018999	ENSCAFT00000030169						188		0/0	99	0/0	99	./.	9	1/1	90
5	54379442				A	TTC22	3_prime_UTR_variant	ENSCAFG00000018999	ENSCAFT00000043914	1788
5	54987663	T	C	1435.15	C	TMEM59	3_prime_UTR_variant	ENSCAFG00000019064	ENSCAFT00000043474	1389							0/1	99	0/0	99	0/0	99	0/0	99
5	54987663				C		downstream_gene_variant	ENSCAFG00000032453	ENSCAFT00000043422						3576
5	54987663				C	TMEM59	downstream_gene_variant	ENSCAFG00000019064	ENSCAFT00000030270						384
5	54989411	C	A	133.15	A	TMEM59	3_prime_UTR_variant	ENSCAFG00000019064	ENSCAFT00000043474	3137							0/1	99	0/0	99	0/0	99	0/0	99
5	54989411				A	TMEM59	downstream_gene_variant	ENSCAFG00000019064	ENSCAFT00000030270						2132
5	55022178	C	T	639.74	T	LRRC42	missense_variant	ENSCAFG00000019068	ENSCAFT00000030282	1083	1069	357	V/M	Gtg/Atg		tolerated(0.22)	0/0	45	1/1	51	0/0	84	0/0	78
5	55954508	G	A	637.74	A	PODN	intron_variant	ENSCAFG00000019183	ENSCAFT00000030455								1/1	51	0/0	42	0/0	99	0/0	54
5	55954508				A	SCP2	synonymous_variant	ENSCAFG00000032423	ENSCAFT00000046744	1052	300	100	A	gcC/gcT
5	56169747	C	T	248.24	T	SAMD11	synonymous_variant	ENSCAFG00000019373	ENSCAFT00000030786	918	918	306	P	ccC/ccT			0/0	27	1/1	24	0/0	42	./.	9
5	56169747				T	NOC2L	intron_variant	ENSCAFG00000019369	ENSCAFT00000047444
5	56169747				T	NOC2L	downstream_gene_variant	ENSCAFG00000019369	ENSCAFT00000030783						2833
5	56169747				T	SAMD11	synonymous_variant	ENSCAFG00000019373	ENSCAFT00000049070	2053	1401	467	P	ccC/ccT
5	56169747				T	HES4	intron_variant	ENSCAFG00000019350	ENSCAFT00000043997
5	56271926	C	A	131.16	A	AGRN	synonymous_variant	ENSCAFG00000019342	ENSCAFT00000030741	6649	5931	1977	G	ggC/ggA			0/0	99	0/0	21	0/0	66	0/1	99
5	56699689	C	T	282.15	T		missense_variant	ENSCAFG00000019232	ENSCAFT00000047352	1643	1643	548	R/Q	cGg/cAg		deleterious(0)	0/1	99	0/0	99	0/0	99	0/0	93
5	56699689				T		missense_variant	ENSCAFG00000019232	ENSCAFT00000030524	1700	1700	567	R/Q	cGg/cAg		deleterious(0.01)
5	56699689				T	MMP23B	downstream_gene_variant	ENSCAFG00000019238	ENSCAFT00000030533						2451
5	56699689				T		missense_variant	ENSCAFG00000019232	ENSCAFT00000044945	2224	1541	514	R/Q	cGg/cAg		deleterious(0)
5	56699689				T		missense_variant	ENSCAFG00000019232	ENSCAFT00000044782	1658	1658	553	R/Q	cGg/cAg		deleterious(0)
5	57473036	G	A	125.15	A	TTC34	missense_variant	ENSCAFG00000019470	ENSCAFT00000045379	1618	1618	540	R/W	Cgg/Tgg		deleterious(0)	0/1	99	0/0	39	0/0	54	0/0	99
5	57473036				A	TTC34	missense_variant	ENSCAFG00000019470	ENSCAFT00000030960	1669	1669	557	R/W	Cgg/Tgg		deleterious(0)
5	60374143	T	A	673.15	A	NOL9	3_prime_UTR_variant	ENSCAFG00000019604	ENSCAFT00000031165	3664							0/1	99	0/0	99	0/0	99	0/0	99
5	62575265	T	A	1776.15	A	H6PD	3_prime_UTR_variant	ENSCAFG00000019727	ENSCAFT00000048040	5229							0/0	99	0/0	99	0/1	99	0/0	99
5	62575265				A	H6PD	downstream_gene_variant	ENSCAFG00000019727	ENSCAFT00000031369						2633
5	62669251	C	T	30.99	T	SPSB1	3_prime_UTR_variant	ENSCAFG00000019732	ENSCAFT00000031375	2688							./.	4	0/0	21	0/0	78	0/1	61
5	63152754	A	G	142.22	G	NMNAT1	3_prime_UTR_variant	ENSCAFG00000032251	ENSCAFT00000047631	2113							0/1	61	./.	3	0/0	15	./.	9
5	63215024	C	A	2093.52	A	UBE4B	5_prime_UTR_variant	ENSCAFG00000019797	ENSCAFT00000046848	16							0/1	99	0/0	99	0/0	99	1/1	99
5	63215024				A	UBE4B	upstream_gene_variant	ENSCAFG00000019797	ENSCAFT00000031485						538
5	63516269	C	G	56.19	G	KIF1B	downstream_gene_variant	ENSCAFG00000019785	ENSCAFT00000031471						4241		0/0	69	0/0	18	0/1	89	0/0	24
5	63516269				G	KIF1B	3_prime_UTR_variant	ENSCAFG00000019785	ENSCAFT00000048410	8285
5	63744328	C	T	4365.74	T	SPIRE2	synonymous_variant	ENSCAFG00000019811	ENSCAFT00000031513	1110	1110	370	T	acG/acA			0/0	99	1/1	99	0/0	99	0/0	99
5	64228809	C	T	2858.74	T	ANKRD11	3_prime_UTR_variant	ENSCAFG00000019843	ENSCAFT00000048247	8102							0/0	99	0/0	99	1/1	99	0/0	99
5	64228809				T	ANKRD11	downstream_gene_variant	ENSCAFG00000019843	ENSCAFT00000031567						56
5	64305713	A	G	687.74	G	ACSF3	synonymous_variant	ENSCAFG00000019849	ENSCAFT00000031573	1317	1305	435	S	tcT/tcC			0/0	48	0/0	33	1/1	54	0/0	33
5	64635436	G	A	1453.15	A	PIEZO1	synonymous_variant	ENSCAFG00000019870	ENSCAFT00000031623	5940	5658	1886	E	gaG/gaA			0/1	99	0/0	99	0/0	99	0/0	99
5	64635436				A	PIEZO1	synonymous_variant	ENSCAFG00000019870	ENSCAFT00000031621	5652	5652	1884	E	gaG/gaA
5	64635436				A	ZNF469	intron_variant	ENSCAFG00000029455	ENSCAFT00000047707
5	64635436				A	CTU2	intron_variant	ENSCAFG00000019873	ENSCAFT00000045724
5	64635436				A	CTU2	intron_variant	ENSCAFG00000019873	ENSCAFT00000031626
5	64639348	C	T	3389.74	T	PIEZO1	synonymous_variant	ENSCAFG00000019870	ENSCAFT00000031623	7245	6963	2321	A	gcC/gcT			0/0	99	0/0	96	1/1	99	0/0	99
5	64639348				T	PIEZO1	synonymous_variant	ENSCAFG00000019870	ENSCAFT00000031621	6981	6981	2327	A	gcC/gcT
5	64639348				T	CTU2	downstream_gene_variant	ENSCAFG00000019873	ENSCAFT00000031625						1124
5	64639348				T	ZNF469	intron_variant	ENSCAFG00000029455	ENSCAFT00000047707
5	64639348				T	CTU2	intron_variant	ENSCAFG00000019873	ENSCAFT00000045724
5	64639348				T	CTU2	intron_variant	ENSCAFG00000019873	ENSCAFT00000031626
5	64708889	C	T	104.15	T	ZC3H18	downstream_gene_variant	ENSCAFG00000019884	ENSCAFT00000031642						275		0/1	99	0/0	87	0/0	99	0/0	87
5	64708889				T	ZNF469	intron_variant	ENSCAFG00000029455	ENSCAFT00000047707
5	64708889				T	ZC3H18	3_prime_UTR_variant	ENSCAFG00000019884	ENSCAFT00000050086	3776
5	64815186	G	A	191.75	A	ZFPM1	synonymous_variant	ENSCAFG00000032382	ENSCAFT00000042926	842	801	267	P	ccC/ccT			./.	12	1/1	18	./.	12	0/0	24
5	64815186				A	ZNF469	intron_variant	ENSCAFG00000029455	ENSCAFT00000047707
5	67019055	C	G	374.15	G	GSE1	missense_variant	ENSCAFG00000019928	ENSCAFT00000031711	1487	544	182	A/P	Gcc/Ccc		tolerated(0.48)	0/1	99	0/0	99	0/0	99	0/0	99
5	67908919	G	A	2634.15	A	COTL1	3_prime_UTR_variant	ENSCAFG00000032529	ENSCAFT00000046781	961							0/1	99	0/0	99	0/0	99	0/0	99
5	68183674	G	T	89.15	T	TAF1C	synonymous_variant	ENSCAFG00000019962	ENSCAFT00000031769	2268	2268	756	A	gcG/gcT			0/1	99	0/0	99	0/0	99	0/0	60
5	68183674				T	DNAAF1	downstream_gene_variant	ENSCAFG00000019964	ENSCAFT00000031771						569
5	68216842	A	G	908.52	G	HSDL1	missense_variant	ENSCAFG00000019965	ENSCAFT00000031773	320	56	19	N/S	aAt/aGt		tolerated(0.84)	0/1	99	1/1	36	0/0	99	0/0	99
5	73898391	G	A	1493.78	A	ADAMTS18	missense_variant	ENSCAFG00000020038	ENSCAFT00000031887	3280	3280	1094	E/K	Gag/Aag		tolerated(0.82)	0/0	99	0/0	99	1/1	99	0/0	36
5	73898391				A	SYCE1L	intron_variant	ENSCAFG00000029237	ENSCAFT00000047842
5	75172464	G	A	2054.04	A		missense_variant	ENSCAFG00000032242	ENSCAFT00000045515	217	217	73	G/S	Ggc/Agc			0/0	27	1/1	75	1/1	81	0/0	42
5	75172464				A	KARS	upstream_gene_variant	ENSCAFG00000020069	ENSCAFT00000031942						3397
5	75172464				A	TERF2IP	synonymous_variant	ENSCAFG00000020066	ENSCAFT00000031933	375	375	125	A	gcC/gcT
5	75264977	G	T	1039	T		3_prime_UTR_variant	ENSCAFG00000020074	ENSCAFT00000049234	1448							0/0	99	1/1	33	1/1	48	0/0	72
5	75264977				T		missense_variant	ENSCAFG00000020074	ENSCAFT00000031948	919	919	307	A/S	Gca/Tca		tolerated(0.81)
5	76363209	G	A	1320.74	A		synonymous_variant	ENSCAFG00000020137	ENSCAFT00000032061	1684	1119	373	A	gcG/gcA			0/0	99	0/0	99	0/0	99	1/1	68
5	76457203	G	A	1403.74	A	FUK	synonymous_variant	ENSCAFG00000020144	ENSCAFT00000032074	1719	1719	573	L	ctG/ctA			0/0	99	0/0	99	0/0	99	1/1	85
5	77828135	A	G	98.15	G	PMFBP1	downstream_gene_variant	ENSCAFG00000020240	ENSCAFT00000043531						4682		0/1	99	0/0	48	0/0	36	0/0	39
5	77828135				G	DHX38	missense_variant	ENSCAFG00000020228	ENSCAFT00000032225	3538	3521	1174	E/G	gAg/gGg		deleterious(0)
5	78607618	C	A	319.15	A	ZFHX3	synonymous_variant	ENSCAFG00000020243	ENSCAFT00000032240	2370	2370	790	G	ggG/ggT			0/1	99	0/0	69	0/0	99	0/0	51
5	80875784	G	T	65.15	T	CDH3	missense_variant	ENSCAFG00000020303	ENSCAFT00000032339	2655	1698	566	N/K	aaC/aaA		deleterious(0.01)	0/1	98	0/0	33	0/0	99	0/0	33
5	80875784				T	CDH1	intron_variant	ENSCAFG00000020305	ENSCAFT00000032337
5	81216520	C	G	30.36	G	SLC7A6OS	upstream_gene_variant	ENSCAFG00000020314	ENSCAFT00000032356						223		0/0	30	0/1	63	0/0	33	./.	12
5	81216520				G	PRMT7	upstream_gene_variant	ENSCAFG00000020312	ENSCAFT00000032353						1644
5	81216520				G	SLC7A6OS	synonymous_variant	ENSCAFG00000020314	ENSCAFT00000043553	12	12	4	A	gcC/gcG
5	81556190	C	T	352.15	T	SLC12A4	downstream_gene_variant	ENSCAFG00000020329	ENSCAFT00000032375						716		0/0	99	0/0	99	0/1	99	0/0	93
5	81556190				T	LCAT	missense_variant	ENSCAFG00000020332	ENSCAFT00000032380	64	64	22	P/S	Ccc/Tcc		tolerated(0.58)
5	81556190				T	SLC12A4	downstream_gene_variant	ENSCAFG00000020329	ENSCAFT00000049293						768
5	81556190				T	PSMB10	upstream_gene_variant	ENSCAFG00000020333	ENSCAFT00000032381						4985
5	82168047	A	C	3863.15	C	E2F4	downstream_gene_variant	ENSCAFG00000020375	ENSCAFT00000044632						2142		0/0	99	0/0	99	0/1	99	0/0	99
5	82168047				C	E2F4	downstream_gene_variant	ENSCAFG00000020375	ENSCAFT00000032451						2142
5	82168047				C	cfa-mir-328	downstream_gene_variant	ENSCAFG00000022815	ENSCAFT00000034922						1777
5	82168047				C	ELMO3	missense_variant	ENSCAFG00000020374	ENSCAFT00000032449	356	356	119	L/R	cTt/cGt		deleterious(0)
5	82168047				C	ELMO3	missense_variant	ENSCAFG00000020374	ENSCAFT00000032447	1713	725	242	L/R	cTt/cGt		deleterious(0)
6	753644	G	A	789.05	A	NDUFS4	missense_variant	ENSCAFG00000010200	ENSCAFT00000016189	89	89	30	A/V	gCt/gTt		tolerated(0.31)	./.	.	1/1	18	./.	12	1/1	33
6	2750204	C	T	9361.52	T	AUTS2	missense_variant	ENSCAFG00000011229	ENSCAFT00000017875	2068	2068	690	G/S	Ggc/Agc		tolerated(0.96)	0/1	99	1/1	99	0/0	99	0/0	99
6	6182055	C	T	2952.15	T	EIF4H	3_prime_UTR_variant	ENSCAFG00000012019	ENSCAFT00000019083	763							0/0	99	0/0	99	0/0	99	0/1	99
6	6888233	C	T	569.74	T	NSUN5	synonymous_variant	ENSCAFG00000013197	ENSCAFT00000021018	553	144	48	A	gcC/gcT			0/0	99	0/0	96	1/1	48	0/0	99
6	6961118	C	T	2700.74	T	HIP1	3_prime_UTR_variant	ENSCAFG00000013367	ENSCAFT00000045638	3137							0/0	72	0/0	99	1/1	99	0/0	99
6	6961118				T	HIP1	downstream_gene_variant	ENSCAFG00000013367	ENSCAFT00000021231						1174
6	6961136	G	A	2470.74	A	HIP1	3_prime_UTR_variant	ENSCAFG00000013367	ENSCAFT00000045638	3119							0/0	63	0/0	99	1/1	99	0/0	99
6	6961136				A	HIP1	downstream_gene_variant	ENSCAFG00000013367	ENSCAFT00000021231						1156
6	6974446	C	T	1346.76	T	HIP1	synonymous_variant	ENSCAFG00000013367	ENSCAFT00000045638	2124	2124	708	T	acG/acA			0/0	27	0/0	24	1/1	99	0/0	27
6	6974446				T	HIP1	synonymous_variant	ENSCAFG00000013367	ENSCAFT00000021231	2115	2115	705	T	acG/acA
6	6977762	C	T	1341.9	T	HIP1	missense_variant	ENSCAFG00000013367	ENSCAFT00000045638	1642	1642	548	V/M	Gtg/Atg		tolerated(0.18)	./.	12	0/0	30	1/1	99	0/0	42
6	6977762				T	HIP1	missense_variant	ENSCAFG00000013367	ENSCAFT00000021231	1633	1633	545	V/M	Gtg/Atg		tolerated(0.18)
6	7316619	G	A	694.15	A	OR	3_prime_UTR_variant	ENSCAFG00000013467	ENSCAFT00000021363	2847							0/1	99	0/0	99	0/0	81	0/0	99
6	7316619				A		3_prime_UTR_variant	ENSCAFG00000013483	ENSCAFT00000021384	1254
6	9111695	C	T	953.74	T	LRCH4	synonymous_variant	ENSCAFG00000014336	ENSCAFT00000048226	1788	1788	596	S	tcC/tcT			0/0	99	0/0	99	1/1	75	0/0	99
6	9111695				T	SAP25	upstream_gene_variant	ENSCAFG00000014343	ENSCAFT00000022780						2849
6	9111695				T	LRCH4	synonymous_variant	ENSCAFG00000014336	ENSCAFT00000044371	1764	1764	588	S	tcC/tcT
6	9111695				T	LRCH4	synonymous_variant	ENSCAFG00000014336	ENSCAFT00000022772	1845	1845	615	S	tcC/tcT
6	9185863	G	A	69.23	A	NYAP1	missense_variant	ENSCAFG00000014374	ENSCAFT00000022844	2299	2299	767	P/S	Ccg/Tcg		tolerated(0.11)	0/1	99	./.	.	0/0	18	./.	.
6	9185863				A	NYAP1	missense_variant	ENSCAFG00000014374	ENSCAFT00000043643	2005	1921	641	P/S	Ccg/Tcg		tolerated(0.18)
6	9366369	C	T	31.17	T	C7orf43	upstream_gene_variant	ENSCAFG00000030613	ENSCAFT00000047914						1831		0/0	48	0/0	27	0/0	21	0/1	27
6	9366369				T	GAL3ST4	synonymous_variant	ENSCAFG00000014551	ENSCAFT00000023104	12	12	4	D	gaC/gaT
6	10053569	T	C	235.2	C	ZNF789	3_prime_UTR_variant	ENSCAFG00000030977	ENSCAFT00000048508	1824							./.	3	0/1	66	0/1	17	0/1	99
6	10053569				C	ZNF789	3_prime_UTR_variant	ENSCAFG00000030977	ENSCAFT00000048135	1722
6	10136900	C	T	74.15	T		intron_variant	ENSCAFG00000015055	ENSCAFT00000023902								0/0	30	0/0	72	0/0	45	0/1	23
6	10136900				T	CPSF4	downstream_gene_variant	ENSCAFG00000015036	ENSCAFT00000023892						1209
6	10136900				T	CPSF4	3_prime_UTR_variant	ENSCAFG00000015036	ENSCAFT00000043832	2432
6	10573648	C	T	337.84	T	TRRAP	synonymous_variant	ENSCAFG00000015242	ENSCAFT00000024317	5985	5925	1975	P	ccG/ccA			0/0	18	0/0	30	1/1	30	0/0	36
6	10573648				T	TRRAP	synonymous_variant	ENSCAFG00000015242	ENSCAFT00000043609	5931	5871	1957	P	ccG/ccA
6	11118220	G	C	2877.74	C	BHLHA15	upstream_gene_variant	ENSCAFG00000015425	ENSCAFT00000024465						2963		0/0	99	0/0	99	1/1	99	0/0	99
6	11118220				C	TECPR1	downstream_gene_variant	ENSCAFG00000015408	ENSCAFT00000024460						2850
6	11118220				C	LMTK2	downstream_gene_variant	ENSCAFG00000015432	ENSCAFT00000024481						2863
6	11118220				C	LMTK2	3_prime_UTR_variant	ENSCAFG00000015432	ENSCAFT00000046575	7681
6	11120074	G	A	2529.74	A	BHLHA15	upstream_gene_variant	ENSCAFG00000015425	ENSCAFT00000024465						4817		0/0	99	0/0	99	0/0	99	1/1	99
6	11120074				A	TECPR1	downstream_gene_variant	ENSCAFG00000015408	ENSCAFT00000024460						4704
6	11120074				A	LMTK2	downstream_gene_variant	ENSCAFG00000015432	ENSCAFT00000024481						1009
6	11120074				A	LMTK2	3_prime_UTR_variant	ENSCAFG00000015432	ENSCAFT00000046575	5827
6	11447315	G	A	77.15	A	AIMP2	downstream_gene_variant	ENSCAFG00000015635	ENSCAFT00000024775						1137		0/0	99	0/0	99	0/1	99	0/0	99
6	11447315				A	EIF2AK1	synonymous_variant	ENSCAFG00000015665	ENSCAFT00000050124	1809	1809	603	I	atC/atT
6	11447315				A	EIF2AK1	synonymous_variant	ENSCAFG00000015665	ENSCAFT00000024820	1803	1803	601	I	atC/atT
6	11471659	G	T	65.35	T	EIF2AK1	missense_variant	ENSCAFG00000015665	ENSCAFT00000050124	122	122	41	S/Y	tCt/tAt		deleterious(0)	0/1	28	0/0	60	0/0	27	0/0	30
6	11471659				T	EIF2AK1	missense_variant	ENSCAFG00000015665	ENSCAFT00000024820	122	122	41	S/Y	tCt/tAt		deleterious(0)
6	11555508	C	T	2217.03	T	CYTH3	downstream_gene_variant	ENSCAFG00000015701	ENSCAFT00000024884						2003		0/1	99	0/0	24	1/1	99	0/1	80
6	11555508				T	USP42	3_prime_UTR_variant	ENSCAFG00000015684	ENSCAFT00000024838	5840
6	11555508				T	CYTH3	downstream_gene_variant	ENSCAFG00000015701	ENSCAFT00000045954						2046
6	12475374	G	A	5092.74	A	FBXL18	3_prime_UTR_variant	ENSCAFG00000016024	ENSCAFT00000025425	2650							0/0	99	0/0	99	1/1	99	0/0	99
6	12477061	T	C	3215.74	C	FBXL18	3_prime_UTR_variant	ENSCAFG00000016024	ENSCAFT00000025425	4337							0/0	99	0/0	99	1/1	99	0/0	99
6	12555397	C	T	385.15	T	TNRC18	missense_variant	ENSCAFG00000016034	ENSCAFT00000047576	2209	2209	737	R/W	Cgg/Tgg			0/0	39	0/0	36	0/0	45	0/1	99
6	12555397				T	TNRC18	missense_variant	ENSCAFG00000016034	ENSCAFT00000025446	2032	2032	678	R/W	Cgg/Tgg		deleterious(0)
6	12555397				T	TNRC18	missense_variant	ENSCAFG00000016034	ENSCAFT00000042942	1434	1228	410	R/W	Cgg/Tgg
6	12600312	C	T	3241.15	T	TNRC18	synonymous_variant	ENSCAFG00000016034	ENSCAFT00000047576	7224	7224	2408	S	tcC/tcT			0/0	99	0/0	99	0/0	99	0/1	99
6	12600312				T	TNRC18	synonymous_variant	ENSCAFG00000016034	ENSCAFT00000025446	7050	7050	2350	S	tcC/tcT
6	12600312				T	TNRC18	synonymous_variant	ENSCAFG00000016034	ENSCAFT00000042942	6446	6240	2080	S	tcC/tcT
6	13356076	T	C	126.98	C	SDK1	missense_variant	ENSCAFG00000016192	ENSCAFT00000025755	1804	1579	527	I/V	Att/Gtt		tolerated(0.78)	./.	.	0/0	24	0/0	18	0/1	99
6	13356094	G	A	108.08	A	SDK1	missense_variant	ENSCAFG00000016192	ENSCAFT00000025755	1786	1561	521	P/S	Cca/Tca		tolerated(0.91)	./.	.	0/0	15	0/0	15	0/1	21
6	14860069	C	T	260.15	T	SNX8	synonymous_variant	ENSCAFG00000016426	ENSCAFT00000026041	834	375	125	Y	taC/taT			0/1	99	0/0	66	0/0	93	0/0	99
6	15865828	C	T	236.15	T	C7orf50	missense_variant	ENSCAFG00000011773	ENSCAFT00000018687	1073	344	115	T/M	aCg/aTg		deleterious(0)	0/0	87	0/0	66	0/1	99	0/0	48
6	16292404	C	G	96.16	G	PDGFA	downstream_gene_variant	ENSCAFG00000011193	ENSCAFT00000017795						556		0/0	45	0/0	21	0/0	84	0/1	99
6	16292404				G	PDGFA	3_prime_UTR_variant	ENSCAFG00000011193	ENSCAFT00000050101	1846
6	16783599	G	A	493.15	A	ARMC5	synonymous_variant	ENSCAFG00000016892	ENSCAFT00000026742	2317	2317	773	L	Ctg/Ttg			0/0	99	0/0	99	0/1	99	0/0	99
6	16783599				A	TGFB1I1	upstream_gene_variant	ENSCAFG00000016896	ENSCAFT00000026755						3914
6	17113332	G	C	1427.15	C	PRSS8	missense_variant	ENSCAFG00000031655	ENSCAFT00000026685	1163	639	213	Q/H	caG/caC		tolerated(0.07)	0/1	99	0/0	99	0/0	99	0/0	99
6	17113332				C	MYST1	3_prime_UTR_variant	ENSCAFG00000016838	ENSCAFT00000026659	2680
6	17452843	G	A	4025.15	A	SRCAP	upstream_gene_variant	ENSCAFG00000016640	ENSCAFT00000045283						2964		0/0	99	0/1	99	0/0	99	0/0	99
6	17452843				A	SRCAP	missense_variant	ENSCAFG00000016640	ENSCAFT00000048702	4119	3488	1163	T/M	aCg/aTg		tolerated(0.12)
6	17452843				A	SRCAP	missense_variant	ENSCAFG00000016640	ENSCAFT00000026363	3488	3488	1163	T/M	aCg/aTg		tolerated(0.1)
6	17501227	A	G	578.15	G	FBRS	missense_variant	ENSCAFG00000016634	ENSCAFT00000026354	1436	1436	479	L/P	cTt/cCt		deleterious(0)	0/0	99	0/0	99	0/0	93	0/1	99
6	17540554	T	C	463.15	C		synonymous_variant	ENSCAFG00000030302	ENSCAFT00000047564	1296	303	101	S	tcT/tcC			0/0	93	0/0	99	0/0	60	0/1	99
6	17741514	A	G	243.56	G	CD2BP2	3_prime_UTR_variant	ENSCAFG00000016943	ENSCAFT00000026820	3576							0/1	32	1/1	15	0/0	24	0/1	60
6	17741547	A	G	176.92	G	CD2BP2	3_prime_UTR_variant	ENSCAFG00000016943	ENSCAFT00000026820	3609							0/1	18	0/0	18	0/1	63	./.	8
6	17879931	G	A	3973.15	A	PAGR1	downstream_gene_variant	ENSCAFG00000016976	ENSCAFT00000026873						605		0/0	99	0/0	99	0/0	99	0/1	99
6	17879931				A	LRP	5_prime_UTR_variant	ENSCAFG00000016970	ENSCAFT00000026871	888
6	17879931				A	PRRT2	downstream_gene_variant	ENSCAFG00000016965	ENSCAFT00000026859						4738
6	17896790	G	A	1855.15	A	LRP	missense_variant	ENSCAFG00000016970	ENSCAFT00000026871	2167	1168	390	V/M	Gtg/Atg		deleterious(0)	0/0	99	0/0	99	0/0	99	0/1	99
6	17900161	C	T	2710.15	T	LRP	missense_variant	ENSCAFG00000016970	ENSCAFT00000026871	2965	1966	656	R/C	Cgc/Tgc		deleterious(0)	0/1	99	0/0	99	0/0	99	0/0	99
6	18114349	T	C	626.15	C	MAPK3	missense_variant	ENSCAFG00000017108	ENSCAFT00000027090	206	206	69	Q/R	cAg/cGg		tolerated(0.22)	0/1	99	0/0	99	0/0	99	0/0	99
6	18250712	C	T	91.42	T	IL27	downstream_gene_variant	ENSCAFG00000017132	ENSCAFT00000027127						2644		0/1	99	./.	9	0/0	15	0/0	24
6	18250712				T		upstream_gene_variant	ENSCAFG00000032132	ENSCAFT00000049699						527
6	18250712				T	APOBR	missense_variant	ENSCAFG00000017135	ENSCAFT00000045568	2635	2482	828	E/K	Gaa/Aaa		tolerated(0.07)
6	18250712				T	IL27	downstream_gene_variant	ENSCAFG00000017132	ENSCAFT00000046162						2586
6	18250712				T	APOBR	missense_variant	ENSCAFG00000017135	ENSCAFT00000027137	1864	1864	622	E/K	Gaa/Aaa		tolerated(0.14)
6	18250712				T	CLN3	upstream_gene_variant	ENSCAFG00000017139	ENSCAFT00000027142						4325
6	18495481	G	A	108.37	A	SBK1	synonymous_variant	ENSCAFG00000017336	ENSCAFT00000027470	1443	462	154	C	tgC/tgT			./.	9	0/1	22	0/0	24	0/0	21
6	18515493	T	C	680.76	C	SBK1	5_prime_UTR_variant	ENSCAFG00000017336	ENSCAFT00000027470	652							0/1	99	0/0	36	0/1	99	0/0	99
6	19256231	G	A	1227.15	A	IL4R	missense_variant	ENSCAFG00000017447	ENSCAFT00000027653	1466	1448	483	P/L	cCa/cTa		tolerated(0.13)	0/0	99	0/0	99	0/1	99	0/0	99
6	21066785	G	A	1616.76	A	LCMT1	5_prime_UTR_variant	ENSCAFG00000017485	ENSCAFT00000048695	227							0/0	99	0/1	99	0/1	99	0/0	99
6	21483303	G	C	362.15	C	RBBP6	missense_variant	ENSCAFG00000017566	ENSCAFT00000044188	4252	3308	1103	T/R	aCa/aGa		deleterious(0.01)	0/0	99	0/0	99	0/1	99	0/0	99
6	21483303				C	RBBP6	missense_variant	ENSCAFG00000017566	ENSCAFT00000027846	3308	3308	1103	T/R	aCa/aGa		deleterious(0.01)
6	21483330	G	C	508.15	C	RBBP6	missense_variant	ENSCAFG00000017566	ENSCAFT00000044188	4225	3281	1094	S/C	tCt/tGt		tolerated(0.05)	0/0	99	0/0	99	0/1	99	0/0	99
6	21483330				C	RBBP6	missense_variant	ENSCAFG00000017566	ENSCAFT00000027846	3281	3281	1094	S/C	tCt/tGt		tolerated(0.1)
6	21512224	C	T	443.75	T	RBBP6	5_prime_UTR_variant	ENSCAFG00000017566	ENSCAFT00000044188	238							0/0	30	1/1	36	0/0	39	0/0	90
6	21512224				T	RBBP6	upstream_gene_variant	ENSCAFG00000017566	ENSCAFT00000027846						992
6	22209537	A	G	888.15	G	PALB2	upstream_gene_variant	ENSCAFG00000030772	ENSCAFT00000049192						145		0/0	51	0/0	99	0/1	99	0/0	99
6	22209537				G	DCTN5	5_prime_UTR_variant	ENSCAFG00000017666	ENSCAFT00000028014	84
6	22296865	G	T	38.16	T	EARS2	synonymous_variant	ENSCAFG00000017673	ENSCAFT00000028022	1506	1506	502	V	gtG/gtT			0/1	71	0/0	33	0/0	93	0/0	54
6	22404036	A	G	687.15	G	COG7	synonymous_variant	ENSCAFG00000017682	ENSCAFT00000028053	1389	1389	463	T	acA/acG			0/0	99	0/0	99	0/1	99	0/0	99
6	22404036				G	COG7	synonymous_variant	ENSCAFG00000017682	ENSCAFT00000028055	1220	1194	398	T	acA/acG
6	22432174	G	A	1605.15	A	COG7	synonymous_variant	ENSCAFG00000017682	ENSCAFT00000028053	2088	2088	696	V	gtG/gtA			0/0	99	0/0	99	0/1	99	0/0	99
6	22432174				A	COG7	synonymous_variant	ENSCAFG00000017682	ENSCAFT00000028055	1919	1893	631	V	gtG/gtA
6	22434998	G	A	321.15	A	COG7	synonymous_variant	ENSCAFG00000017682	ENSCAFT00000028053	2175	2175	725	L	ctG/ctA			0/0	66	0/0	69	0/1	99	0/0	99
6	22434998				A	COG7	synonymous_variant	ENSCAFG00000017682	ENSCAFT00000028055	2006	1980	660	L	ctG/ctA
6	22457279	C	A	1604.15	A	SCNN1B	missense_variant	ENSCAFG00000017687	ENSCAFT00000028060	846	714	238	E/D	gaG/gaT		tolerated(0.49)	0/0	63	0/0	99	0/1	99	0/0	99
6	22567819	G	A	269.15	A	SCNN1G	synonymous_variant	ENSCAFG00000017690	ENSCAFT00000028061	1952	1833	611	A	gcC/gcT			0/1	99	0/0	99	0/0	69	0/0	99
6	22665800	A	G	148.15	G	USP31	missense_variant	ENSCAFG00000017694	ENSCAFT00000048254	1223	1055	352	Q/R	cAg/cGg		tolerated(0.06)	0/1	99	0/0	99	0/0	99	0/0	33
6	22665800				G	USP31	missense_variant	ENSCAFG00000017694	ENSCAFT00000028068	1220	1220	407	Q/R	cAg/cGg		tolerated(0.06)
6	22675512	C	T	1133.77	T	USP31	synonymous_variant	ENSCAFG00000017694	ENSCAFT00000048254	1875	1707	569	D	gaC/gaT			0/0	87	0/0	99	0/0	99	1/1	32
6	22675512				T	USP31	synonymous_variant	ENSCAFG00000017694	ENSCAFT00000028068	1878	1878	626	D	gaC/gaT
6	23371569	A	G	1401.15	G	EEF2K	3_prime_UTR_variant	ENSCAFG00000017716	ENSCAFT00000028109	2711							0/1	99	0/0	99	0/0	99	0/0	99
6	23389085	T	G	628.15	G	EEF2K	synonymous_variant	ENSCAFG00000017716	ENSCAFT00000028109	1428	969	323	L	ctA/ctC			0/1	99	0/0	99	0/0	99	0/0	84
6	24907301	C	A	58.92	A	ACSM5	3_prime_UTR_variant	ENSCAFG00000023658	ENSCAFT00000028561	2977							./.	9	0/0	45	./.	6	0/1	17
6	28480479	CG	C	1592.11	-	RRN3	3_prime_UTR_variant	ENSCAFG00000018783	ENSCAFT00000029817	2069							0/0	99	0/0	99	0/0	99	0/1	52
6	30248371	G	T	91.15	T	CPPED1	3_prime_UTR_variant	ENSCAFG00000030194	ENSCAFT00000047642	1389							0/1	99	0/0	99	0/0	99	0/0	99
6	30318816	G	A	615.76	A	SNX29	synonymous_variant	ENSCAFG00000018849	ENSCAFT00000029922	2778	2529	843	G	ggC/ggT			0/1	99	0/1	99	0/0	99	0/0	99
6	31068834	G	A	2748.76	A	TXNDC11	upstream_gene_variant	ENSCAFG00000018890	ENSCAFT00000029994						4142		0/1	99	0/1	99	0/0	99	0/0	99
6	31068834				A	ZC3H7A	3_prime_UTR_variant	ENSCAFG00000018876	ENSCAFT00000029968	3601
6	36366476	G	A	207.15	A		synonymous_variant	ENSCAFG00000019092	ENSCAFT00000030320	819	819	273	L	ctG/ctA			0/0	30	0/0	54	0/0	63	0/1	93
6	36366476				A		downstream_gene_variant	ENSCAFG00000019111	ENSCAFT00000030355						2979
6	36366476				A		synonymous_variant	ENSCAFG00000019092	ENSCAFT00000035149	834	834	278	L	ctG/ctA
6	36547001	C	T	4734.74	T	UBN1	missense_variant	ENSCAFG00000019140	ENSCAFT00000030396	3214	3214	1072	G/S	Ggc/Agc		tolerated(1)	0/0	99	0/0	99	1/1	99	0/0	99
6	36881687	G	A	2607.15	A	HMOX2	synonymous_variant	ENSCAFG00000019207	ENSCAFT00000030490	957	916	306	L	Ctg/Ttg			0/0	99	0/0	99	0/0	99	0/1	99
6	36881687				A	CDIP1	downstream_gene_variant	ENSCAFG00000019204	ENSCAFT00000036260						1687
6	37332200	T	C	91.15	C	ADCY9	3_prime_UTR_variant	ENSCAFG00000019237	ENSCAFT00000044604	5053							0/0	45	0/0	99	0/0	66	0/1	99
6	37332200				C	ADCY9	downstream_gene_variant	ENSCAFG00000019237	ENSCAFT00000030530						640
6	37410270	G	A	330.15	A	CREBBP	missense_variant	ENSCAFG00000019251	ENSCAFT00000030570	175	175	59	G/S	Ggc/Agc		deleterious(0)	0/0	36	0/0	90	0/0	99	0/1	99
6	37410270				A	CREBBP	5_prime_UTR_variant	ENSCAFG00000019251	ENSCAFT00000044601	346
6	37533052	G	A	2560.15	A	CREBBP	missense_variant	ENSCAFG00000019251	ENSCAFT00000030570	6289	6289	2097	G/S	Ggc/Agc		tolerated(0.65)	0/0	99	0/0	99	0/0	99	0/1	99
6	37533052				A	CREBBP	missense_variant	ENSCAFG00000019251	ENSCAFT00000044601	6574	6205	2069	G/S	Ggc/Agc		tolerated(0.66)
6	37658906	C	T	283.2	T	SLX4	synonymous_variant	ENSCAFG00000019268	ENSCAFT00000030592	2664	2103	701	P	ccC/ccT			0/0	27	0/0	27	0/0	18	0/1	46
6	37661833	C	T	694.74	T	SLX4	missense_variant	ENSCAFG00000019268	ENSCAFT00000030592	4636	4075	1359	L/F	Ctc/Ttc		tolerated(0.09)	0/0	99	0/0	99	1/1	57	0/0	90
6	37800688	G	T	49.16	T	ZNF597	3_prime_UTR_variant	ENSCAFG00000032690	ENSCAFT00000045666	3769							0/0	78	0/1	82	0/0	99	0/0	78
6	37822433	G	A	418.15	A	ZNF174	missense_variant	ENSCAFG00000028614	ENSCAFT00000045804	761	761	254	A/V	gCg/gTg		tolerated(0.27)	0/0	84	0/0	99	0/0	93	0/1	99
6	37920497	G	A	891.74	A		3_prime_UTR_variant	ENSCAFG00000032448	ENSCAFT00000050092	2699							0/0	57	0/0	99	1/1	72	0/0	99
6	37929660	G	A	1467.15	A		synonymous_variant	ENSCAFG00000032448	ENSCAFT00000050092	138	138	46	S	agC/agT			0/0	99	0/0	99	0/0	99	0/1	99
6	38302997	A	C	3506.15	C	SRRM2	missense_variant	ENSCAFG00000019346	ENSCAFT00000030745	3215	3215	1072	Q/P	cAg/cCg			0/0	99	0/0	99	0/0	99	0/1	99
6	38372591	G	C	8688.74	C	PRSS22	missense_variant	ENSCAFG00000023636	ENSCAFT00000030721	609	609	203	I/M	atC/atG		deleterious(0)	0/0	99	0/0	99	1/1	99	0/0	99
6	38372591				C	PRSS27	intron_variant	ENSCAFG00000019353	ENSCAFT00000030757
6	38372591				C	PRSS22	missense_variant	ENSCAFG00000023636	ENSCAFT00000012151	609	609	203	I/M	atC/atG		deleterious(0)
6	38576367	G	A	817.07	A	CCNF	missense_variant	ENSCAFG00000019372	ENSCAFT00000030788	1613	1613	538	A/V	gCa/gTa		tolerated(0.19)	0/1	99	0/1	99	0/0	99	0/0	69
6	38584566	C	T	535.16	T	CCNF	missense_variant	ENSCAFG00000019372	ENSCAFT00000030788	892	892	298	V/I	Gtc/Atc		tolerated(0.9)	0/0	99	0/0	99	0/0	99	0/1	99
6	38699581	G	A	3414.74	A		missense_variant	ENSCAFG00000019379	ENSCAFT00000030808	3061	2648	883	G/D	gGc/gAc		tolerated(0.35)	0/0	99	0/0	99	1/1	99	0/0	99
6	38852410	G	A	2435.52	A	PKD1	missense_variant	ENSCAFG00000019424	ENSCAFT00000030883	7743	7742	2581	R/H	cGc/cAc		deleterious(0)	0/0	99	0/0	99	1/1	99	0/1	99
6	38906086	G	A	2926.74	A	SLC9A3R2	synonymous_variant	ENSCAFG00000019449	ENSCAFT00000030930	994	897	299	G	ggC/ggT			0/0	99	0/0	72	1/1	99	0/0	99
6	38906086				A	NTHL1	downstream_gene_variant	ENSCAFG00000019439	ENSCAFT00000049243						4562
6	38906086				A		upstream_gene_variant	ENSCAFG00000032381	ENSCAFT00000049488						987
6	38906086				A	SLC9A3R2	synonymous_variant	ENSCAFG00000019449	ENSCAFT00000043424	1008	1008	336	G	ggC/ggT
6	38906086				A	NTHL1	downstream_gene_variant	ENSCAFG00000019439	ENSCAFT00000030911						1657
6	38936711	G	T	4586.74	T	ZNF598	missense_variant	ENSCAFG00000019456	ENSCAFT00000030940	1233	1157	386	G/V	gGg/gTg		tolerated(0.32)	0/0	99	0/0	99	1/1	99	0/0	99
6	38936711				T		downstream_gene_variant	ENSCAFG00000031645	ENSCAFT00000049188						4076
6	38936762	G	A	57.16	A	ZNF598	missense_variant	ENSCAFG00000019456	ENSCAFT00000030940	1284	1208	403	G/D	gGt/gAt		tolerated(0.33)	0/1	90	0/0	57	0/0	90	0/0	33
6	38936762				A		downstream_gene_variant	ENSCAFG00000031645	ENSCAFT00000049188						4025
6	38960433	C	T	3449.74	T	NOXO1	downstream_gene_variant	ENSCAFG00000019462	ENSCAFT00000030949						4432		0/0	99	0/0	99	1/1	99	0/0	99
6	38960433				T	RNF151	downstream_gene_variant	ENSCAFG00000019463	ENSCAFT00000030950						2605
6	38960433				T	TBL3	intron_variant	ENSCAFG00000019430	ENSCAFT00000048785
6	38960433				T	TBL3	missense_variant	ENSCAFG00000019430	ENSCAFT00000030902	284	284	95	G/D	gGc/gAc		tolerated(0.33)
6	39087010	G	C	113.15	C	HAGH	missense_variant	ENSCAFG00000019490	ENSCAFT00000030988	232	232	78	D/H	Gac/Cac		deleterious(0)	0/1	99	0/0	51	0/0	27	0/0	99
6	39087010				C	HAGH	missense_variant	ENSCAFG00000019490	ENSCAFT00000046831	368	232	78	D/H	Gac/Cac		deleterious(0)
6	39315154	G	A	346.76	A	TELO2	synonymous_variant	ENSCAFG00000019549	ENSCAFT00000044376	1347	1347	449	L	ctC/ctT			0/0	90	0/0	75	1/1	33	0/0	78
6	39315154				A	TELO2	synonymous_variant	ENSCAFG00000019549	ENSCAFT00000031090	1173	1173	391	L	ctC/ctT
6	39318224	G	A	4073.74	A		upstream_gene_variant	ENSCAFG00000029361	ENSCAFT00000047856						4696		0/0	99	0/0	99	1/1	99	0/0	99
6	39318224				A	TELO2	missense_variant	ENSCAFG00000019549	ENSCAFT00000044376	650	650	217	T/M	aCg/aTg		tolerated(0.09)
6	39318224				A	TELO2	missense_variant	ENSCAFG00000019549	ENSCAFT00000031090	476	476	159	T/M	aCg/aTg		tolerated(0.11)
6	39319112	C	T	3605.74	T		upstream_gene_variant	ENSCAFG00000029361	ENSCAFT00000047856						3808		0/0	99	0/0	99	1/1	99	0/0	99
6	39319112				T	TELO2	synonymous_variant	ENSCAFG00000019549	ENSCAFT00000044376	336	336	112	E	gaG/gaA
6	39319112				T	TELO2	synonymous_variant	ENSCAFG00000019549	ENSCAFT00000031090	162	162	54	E	gaG/gaA
6	39406816	C	T	1593.74	T	GNPTG	missense_variant	ENSCAFG00000019583	ENSCAFT00000031129	526	526	176	E/K	Gag/Aag		tolerated(0.21)	0/0	99	0/0	99	1/1	99	0/0	90
6	39406816				T	UNKL	downstream_gene_variant	ENSCAFG00000019581	ENSCAFT00000031127						2931
6	39406816				T	GNPTG	missense_variant	ENSCAFG00000019583	ENSCAFT00000043335	906	619	207	E/K	Gag/Aag		tolerated(0.11)
6	39831773	G	A	772.74	A	MSLNL	downstream_gene_variant	ENSCAFG00000019616	ENSCAFT00000031179						4488		0/0	75	0/0	45	1/1	66	0/0	99
6	39831773				A	MSLN	upstream_gene_variant	ENSCAFG00000023230	ENSCAFT00000035597						1629
6	39831773				A	MSLN	5_prime_UTR_variant	ENSCAFG00000023230	ENSCAFT00000047665	574
6	39920434	A	G	3875.52	G	WDR90	missense_variant	ENSCAFG00000019654	ENSCAFT00000046826	1369	463	155	Y/H	Tac/Cac		deleterious(0)	0/1	99	1/1	99	0/0	99	0/0	99
6	39920434				G	WDR90	missense_variant	ENSCAFG00000019654	ENSCAFT00000031245	457	457	153	Y/H	Tac/Cac		deleterious(0)
6	39920434				G	FAM195A	downstream_gene_variant	ENSCAFG00000030159	ENSCAFT00000046220						1819
6	39920434				G	C16orf13	intron_variant	ENSCAFG00000019655	ENSCAFT00000031253
6	40147083	G	A	402.62	A	MRPL28	downstream_gene_variant	ENSCAFG00000019682	ENSCAFT00000048692						252		0/1	65	1/1	30	0/0	30	0/0	21
6	40147083				A	TMEM8A	downstream_gene_variant	ENSCAFG00000019680	ENSCAFT00000048609						1274
6	40147083				A	TMEM8A	downstream_gene_variant	ENSCAFG00000019680	ENSCAFT00000031292						2244
6	40147083				A	MRPL28	missense_variant	ENSCAFG00000019682	ENSCAFT00000031293	637	637	213	V/M	Gtg/Atg		tolerated(0.13)
6	40324411	G	A	516.06	A	HBA	downstream_gene_variant	ENSCAFG00000029904	ENSCAFT00000050211						3745		0/0	45	./.	12	0/0	30	0/1	99
6	40324411				A	HBA	downstream_gene_variant	ENSCAFG00000029904	ENSCAFT00000045378						2048
6	40324411				A		3_prime_UTR_variant	ENSCAFG00000032615	ENSCAFT00000044579	1394
6	42364044	C	T	2728.52	T	CYB561D1	synonymous_variant	ENSCAFG00000019828	ENSCAFT00000031542	402	402	134	T	acG/acA			1/1	87	0/1	99	0/0	99	0/0	99
6	42364044				T	ATXN7L2	downstream_gene_variant	ENSCAFG00000019829	ENSCAFT00000031543						4067
6	42364044				T	ATXN7L2	downstream_gene_variant	ENSCAFG00000019829	ENSCAFT00000035305						3063
6	42570380	C	T	1211.74	T	CELSR2	missense_variant	ENSCAFG00000019841	ENSCAFT00000031564	3028	3028	1010	A/T	Gct/Act		deleterious(0)	0/0	99	0/0	99	1/1	99	0/0	99
6	49740683	C	T	1657.15	T	RTCA	missense_variant	ENSCAFG00000020010	ENSCAFT00000031847	1488	910	304	A/T	Gca/Aca		deleterious(0)	0/0	99	0/1	99	0/0	99	0/0	99
6	54771663	T	C	4143.15	C	ABCD3	missense_variant	ENSCAFG00000020112	ENSCAFT00000042834	973	863	288	K/R	aAg/aGg		tolerated(0.35)	0/0	99	0/0	99	0/0	99	0/1	99
6	54771663				C	ABCD3	missense_variant	ENSCAFG00000020112	ENSCAFT00000032011	716	716	239	K/R	aAg/aGg		tolerated(0.57)
6	56448397	C	G	890.15	G	EVI5	3_prime_UTR_variant	ENSCAFG00000020154	ENSCAFT00000042794	3111							0/0	99	0/0	99	0/0	99	0/1	99
6	56448397				G	EVI5	downstream_gene_variant	ENSCAFG00000020154	ENSCAFT00000032091						1695
6	58694892	C	T	2697.74	T	LRRC8D	synonymous_variant	ENSCAFG00000024246	ENSCAFT00000032166	477	477	159	P	ccG/ccA			0/0	99	0/0	99	1/1	99	0/0	99
6	59384041	T	C	491.18	C		synonymous_variant	ENSCAFG00000020204	ENSCAFT00000049941	126	126	42	A	gcT/gcC			0/1	99	0/0	99	0/0	39	0/0	18
6	59384041				C		synonymous_variant	ENSCAFG00000020204	ENSCAFT00000032180	144	144	48	A	gcT/gcC
6	63061156	A	G	36.47	G	U6	upstream_gene_variant	ENSCAFG00000022064	ENSCAFT00000034171						3826		0/1	69	./.	9	./.	12	0/0	18
6	63061156				G	LPAR3	missense_variant	ENSCAFG00000020300	ENSCAFT00000032330	1034	601	201	I/V	Atc/Gtc		tolerated(1)
6	63616710	C	T	1100.15	T	PRKACB	downstream_gene_variant	ENSCAFG00000020319	ENSCAFT00000032361						1872		0/0	99	0/0	99	0/1	99	0/0	99
6	63616710				T	PRKACB	3_prime_UTR_variant	ENSCAFG00000020319	ENSCAFT00000047710	2934
6	65620462	C	A	33.15	A	LPHN2	missense_variant	ENSCAFG00000020330	ENSCAFT00000032382	3696	2698	900	G/C	Ggc/Tgc		deleterious(0)	0/1	66	0/0	75	0/0	99	0/0	99
6	65620462				A	LPHN2	missense_variant	ENSCAFG00000020330	ENSCAFT00000032389	2767	2659	887	G/C	Ggc/Tgc		deleterious(0)
6	68155374	C	T	589.15	T	ELTD1	missense_variant	ENSCAFG00000020340	ENSCAFT00000032397	901	901	301	P/S	Ccc/Tcc		tolerated(0.79)	0/1	99	0/0	99	0/0	99	0/0	99
6	68155374				T	ELTD1	missense_variant	ENSCAFG00000020340	ENSCAFT00000032396	1844	1393	465	P/S	Ccc/Tcc		tolerated(0.81)
6	69151018	G	A	1820.15	A	USP33	missense_variant	ENSCAFG00000020373	ENSCAFT00000045024	1275	856	286	D/N	Gat/Aat		tolerated(0.07)	0/1	99	0/0	99	0/0	99	0/0	99
6	69151018				A	USP33	missense_variant	ENSCAFG00000020373	ENSCAFT00000032445	949	949	317	D/N	Gat/Aat		tolerated(0.09)
6	69225340	C	A	222.15	A	ZZZ3	missense_variant	ENSCAFG00000020376	ENSCAFT00000032454	1489	1489	497	L/M	Ctg/Atg		deleterious(0.01)	0/1	99	0/0	99	0/0	99	0/0	93
6	71675558	T	A	1115.16	A	CRYZ	3_prime_UTR_variant	ENSCAFG00000020404	ENSCAFT00000036702	1279							0/1	99	0/0	99	0/0	99	0/0	99
6	71675558				A	TYW3	intron_variant	ENSCAFG00000032209	ENSCAFT00000044278
6	75471126	A	C	2741.15	C	SRSF11	downstream_gene_variant	ENSCAFG00000020423	ENSCAFT00000032525						2470		0/0	99	0/1	99	0/0	99	0/0	99
6	75471126				C	ANKRD13C	3_prime_UTR_variant	ENSCAFG00000020422	ENSCAFT00000032524	2185
6	75539876	C	T	611.15	T	LRRC40	missense_variant	ENSCAFG00000020424	ENSCAFT00000032526	704	397	133	R/C	Cgt/Tgt		deleterious(0.03)	0/0	87	0/0	99	0/0	99	0/1	99
6	75539876				T	SRSF11	intron_variant	ENSCAFG00000020423	ENSCAFT00000032525
7	1173060	C	T	527.25	T	NAV1	synonymous_variant	ENSCAFG00000010744	ENSCAFT00000017126	1917	1917	639	S	tcG/tcA			./.	12	0/0	99	0/1	99	0/0	36
7	1173060				T	NAV1	synonymous_variant	ENSCAFG00000010744	ENSCAFT00000049826	2081	1917	639	S	tcG/tcA
7	2069820	G	A	1807.16	A		missense_variant	ENSCAFG00000032627	ENSCAFT00000048881	41	41	14	A/V	gCg/gTg			0/1	47	./.	.	./.	6	1/1	72
7	2069820				A		splice_region_variant	ENSCAFG00000010830	ENSCAFT00000017208
7	2198350	C	T	513.77	T	KIF21B	synonymous_variant	ENSCAFG00000024839	ENSCAFT00000017574	228	228	76	F	ttC/ttT			0/1	99	0/0	66	0/1	99	0/0	27
7	2198350				T	KIF21B	synonymous_variant	ENSCAFG00000024839	ENSCAFT00000044625	569	228	76	F	ttC/ttT
7	2229116	G	A	420.9	A	KIF21B	downstream_gene_variant	ENSCAFG00000024839	ENSCAFT00000017574						2034		0/1	99	0/0	51	0/1	99	0/0	60
7	2229116				A	KIF21B	3_prime_UTR_variant	ENSCAFG00000024839	ENSCAFT00000044625	6666
7	2229700	C	T	211.15	T		downstream_gene_variant	ENSCAFG00000030161	ENSCAFT00000047135						4940		0/0	78	0/0	48	0/0	66	0/1	99
7	2229700				T	KIF21B	downstream_gene_variant	ENSCAFG00000024839	ENSCAFT00000017574						2618
7	2229700				T	KIF21B	3_prime_UTR_variant	ENSCAFG00000024839	ENSCAFT00000044625	7250
7	2265297	T	G	1501.15	G		upstream_gene_variant	ENSCAFG00000030161	ENSCAFT00000047135						2715		0/0	99	0/0	99	0/1	99	0/0	99
7	2265297				G		3_prime_UTR_variant	ENSCAFG00000029682	ENSCAFT00000048588	3240
7	2265297				G		downstream_gene_variant	ENSCAFG00000029682	ENSCAFT00000045675						642
7	2268549	G	A	1401.54	A		synonymous_variant	ENSCAFG00000029682	ENSCAFT00000048588	2037	1122	374	D	gaC/gaT			0/1	99	0/1	99	0/0	90	0/1	99
7	2268549				A		synonymous_variant	ENSCAFG00000029682	ENSCAFT00000045675	1377	1377	459	D	gaC/gaT
7	2276899	G	A	64.62	A		missense_variant	ENSCAFG00000029682	ENSCAFT00000048588	1034	119	40	A/V	gCc/gTc		tolerated(0.24)	./.	6	./.	3	0/1	95	0/0	24
7	2276899				A		missense_variant	ENSCAFG00000029682	ENSCAFT00000045675	374	374	125	A/V	gCc/gTc		tolerated(0.18)
7	2502454	G	A	3208	A	DDX59	missense_variant	ENSCAFG00000011120	ENSCAFT00000017691	172	172	58	A/T	Gcg/Acg		tolerated(0.62)	0/0	99	0/0	99	0/0	99	0/1	99
7	2502454				A	DDX59	missense_variant	ENSCAFG00000011120	ENSCAFT00000017696	1162	172	58	A/T	Gcg/Acg		tolerated(0.59)
7	4911419	C	T	218.6	T	C1orf53	5_prime_UTR_variant	ENSCAFG00000032715	ENSCAFT00000048039	328							0/0	39	./.	9	0/0	15	0/1	99
7	5902353	C	T	10089.5	T	MAPKAPK2	3_prime_UTR_variant	ENSCAFG00000011432	ENSCAFT00000018146	1304							1/1	99	0/1	99	0/0	99	0/0	99
7	5902353				T		downstream_gene_variant	ENSCAFG00000028418	ENSCAFT00000042701						709
7	6163086	G	A	826.15	A	C1orf116	synonymous_variant	ENSCAFG00000011523	ENSCAFT00000018289	288	288	96	G	ggC/ggT			0/0	54	0/0	36	0/1	99	0/0	99
7	6736057	G	A	704.15	A	CD34	synonymous_variant	ENSCAFG00000011722	ENSCAFT00000048494	1381	951	317	Y	taC/taT			0/0	87	0/0	72	0/0	99	0/1	99
7	6736057				A	CD34	synonymous_variant	ENSCAFG00000011722	ENSCAFT00000018621	1002	1002	334	Y	taC/taT
7	6736057				A	CD34	downstream_gene_variant	ENSCAFG00000011722	ENSCAFT00000048111						138
7	8293671	G	A	11440.5	A	LAMB3	synonymous_variant	ENSCAFG00000011913	ENSCAFT00000018923	465	465	155	S	tcC/tcT			1/1	99	0/1	99	0/0	99	0/0	99
7	10794254	T	A	592.15	A	ATF3	downstream_gene_variant	ENSCAFG00000012339	ENSCAFT00000019588						223		0/0	99	0/1	99	0/0	99	0/0	99
7	10794254				A	ATF3	3_prime_UTR_variant	ENSCAFG00000012339	ENSCAFT00000047278	971
7	12596624	T	G	35.53	G		synonymous_variant	ENSCAFG00000012593	ENSCAFT00000020009	75	75	25	G	ggT/ggG			0/1	68	0/0	99	0/0	99	0/0	99
7	12596624				G		3_prime_UTR_variant	ENSCAFG00000030486	ENSCAFT00000043283	3839
7	12596659	T	C	1098.88	C		missense_variant	ENSCAFG00000012593	ENSCAFT00000020009	110	110	37	L/S	tTg/tCg		deleterious(0.01)	0/0	45	0/0	99	0/1	99	0/0	99
7	12596659				C		3_prime_UTR_variant	ENSCAFG00000030486	ENSCAFT00000043283	3874
7	12610962	C	A	1677.25	A		missense_variant	ENSCAFG00000012593	ENSCAFT00000020009	5173	5173	1725	P/T	Cct/Act		tolerated(0.24)	0/0	85	0/1	99	0/0	99	0/0	99
7	13434132	G	A	1077.15	A	TOR1AIP2	5_prime_UTR_variant	ENSCAFG00000029355	ENSCAFT00000049539	249							0/0	99	0/0	99	0/0	99	0/1	99
7	13453210	C	T	2254.15	T	TOR1AIP1	synonymous_variant	ENSCAFG00000012665	ENSCAFT00000020108	148	148	50	L	Cta/Tta			0/0	99	0/0	99	0/1	99	0/0	99
7	13453210				T	TOR1AIP1	upstream_gene_variant	ENSCAFG00000012665	ENSCAFT00000048034						651
7	13718841	C	T	742.16	T	QSOX1	missense_variant	ENSCAFG00000012717	ENSCAFT00000020190	41	41	14	A/V	gCg/gTg		tolerated(1)	0/0	42	0/1	99	0/0	99	0/0	54
7	13742949	G	A	4050.15	A	QSOX1	missense_variant	ENSCAFG00000012717	ENSCAFT00000020190	890	890	297	R/H	cGc/cAc		deleterious(0.02)	0/0	99	0/0	99	0/0	99	0/1	99
7	13750266	C	T	4231.15	T	QSOX1	missense_variant	ENSCAFG00000012717	ENSCAFT00000020190	1295	1295	432	A/V	gCg/gTg		deleterious(0.05)	0/0	99	0/1	99	0/0	99	0/0	99
7	14556786	G	A	2518.15	A	IER5	synonymous_variant	ENSCAFG00000029718	ENSCAFT00000046339	732	732	244	L	ctG/ctA			0/0	99	0/0	99	0/1	99	0/0	99
7	18021980	G	T	1868.15	T	FAM129A	downstream_gene_variant	ENSCAFG00000013490	ENSCAFT00000021393						2745		0/0	99	0/1	99	0/0	99	0/0	99
7	18021980				T	FAM129A	3_prime_UTR_variant	ENSCAFG00000013490	ENSCAFT00000048252	6310
7	18109623	T	C	654.76	C	FAM129A	missense_variant	ENSCAFG00000013490	ENSCAFT00000021393	23	23	8	K/R	aAa/aGa		tolerated(0.14)	0/1	65	0/0	99	0/1	99	0/0	76
7	18109623				C	FAM129A	missense_variant	ENSCAFG00000013490	ENSCAFT00000048252	849	77	26	K/R	aAa/aGa		tolerated(0.14)
7	20044672	A	C	674.15	C		non_coding_exon_variant	ENSCAFG00000013797	ENSCAFT00000021899	475							0/1	99	0/0	99	0/0	99	0/0	99
7	20044672				C		upstream_gene_variant	ENSCAFG00000013799	ENSCAFT00000021907						2076
7	20726949	G	A	1209.1	A	ABL2	missense_variant	ENSCAFG00000013920	ENSCAFT00000022081	3449	2650	884	V/M	Gtg/Atg		tolerated(0.12)	1/1	24	0/0	54	1/1	75	0/0	30
7	23003199	G	C	313.84	C	PAPPA2	missense_variant	ENSCAFG00000014225	ENSCAFT00000022611	697	697	233	P/A	Cct/Gct		tolerated(0.77)	./.	.	0/0	15	1/1	27	./.	6
7	25426790	C	T	104.71	T	KLHL20	downstream_gene_variant	ENSCAFG00000014549	ENSCAFT00000023107						2635		0/1	40	0/0	27	0/0	36	0/1	99
7	25426790				T	CENPL	3_prime_UTR_variant	ENSCAFG00000014529	ENSCAFT00000023072	4606
7	25426791	A	G	111.71	G	KLHL20	downstream_gene_variant	ENSCAFG00000014549	ENSCAFT00000023107						2634		0/1	46	0/0	27	0/0	36	0/1	99
7	25426791				G	CENPL	3_prime_UTR_variant	ENSCAFG00000014529	ENSCAFT00000023072	4607
7	25667002	G	A	2543.15	A	PRDX6	synonymous_variant	ENSCAFG00000014579	ENSCAFT00000023144	387	255	85	A	gcC/gcT			0/0	99	0/0	99	0/0	99	0/1	99
7	29482514	C	T	1562.15	T	ATP1B1	missense_variant	ENSCAFG00000015258	ENSCAFT00000024212	220	220	74	A/T	Gcc/Acc		tolerated(0.14)	0/1	99	0/0	99	0/0	99	0/0	99
7	29482514				T	ATP1B1	missense_variant	ENSCAFG00000015258	ENSCAFT00000047895	243	49	17	A/T	Gcc/Acc		tolerated(0.15)
7	35128253	G	A	2162.74	A	ZBTB18	missense_variant	ENSCAFG00000015810	ENSCAFT00000025045	1501	715	239	V/M	Gtg/Atg		tolerated(0.24)	0/0	99	1/1	99	0/0	99	0/0	99
7	35439481	T	C	35.86	C	ADSS	3_prime_UTR_variant	ENSCAFG00000015815	ENSCAFT00000025049	3812							0/1	35	./.	9	0/1	32	./.	.
7	37328969	G	T	106.15	T	CNST	missense_variant	ENSCAFG00000015876	ENSCAFT00000025152	361	311	104	R/M	aGg/aTg		deleterious(0.01)	0/0	99	0/0	78	0/1	99	0/0	66
7	37464371	C	A	148.75	A		missense_variant	ENSCAFG00000024406	ENSCAFT00000037695	716	716	239	R/L	cGt/cTt		deleterious(0.02)	0/1	31	0/1	27	0/1	21	0/1	59
7	37464371				A	SCCPDH	intron_variant	ENSCAFG00000015884	ENSCAFT00000025170
7	37464420	T	C	38.78	C		missense_variant	ENSCAFG00000024406	ENSCAFT00000037695	667	667	223	S/G	Agc/Ggc		deleterious(0.02)	0/1	26	0/1	27	0/1	14	./.	12
7	37464420				C	SCCPDH	intron_variant	ENSCAFG00000015884	ENSCAFT00000025170
7	38088556	A	G	164.15	G	ADCK3	missense_variant	ENSCAFG00000016023	ENSCAFT00000045834	1188	1025	342	M/T	aTg/aCg		tolerated(0.12)	0/0	69	0/1	99	0/0	84	0/0	99
7	38088556				G	ADCK3	missense_variant	ENSCAFG00000016023	ENSCAFT00000025423	1025	1025	342	M/T	aTg/aCg		tolerated(0.08)
7	38088556				G		downstream_gene_variant	ENSCAFG00000015982	ENSCAFT00000025396						3853
7	38255731	G	A	738.15	A	ITPKB	missense_variant	ENSCAFG00000016055	ENSCAFT00000025466	751	751	251	A/T	Gca/Aca		deleterious(0.04)	0/0	99	0/1	99	0/0	99	0/0	99
7	38255731				A		synonymous_variant	ENSCAFG00000029029	ENSCAFT00000047323	42	42	14	C	tgC/tgT
7	38255731				A	5S_rRNA	upstream_gene_variant	ENSCAFG00000022057	ENSCAFT00000034164						4859
7	38524132	C	T	9104.52	T	PARP1	missense_variant	ENSCAFG00000016089	ENSCAFT00000045712	1145	983	328	P/L	cCg/cTg		tolerated(0.48)	1/1	99	0/0	99	0/1	99	0/0	99
7	38524132				T	PARP1	missense_variant	ENSCAFG00000016089	ENSCAFT00000025541	992	992	331	P/L	cCg/cTg		tolerated(0.49)
7	38524132				T	5S_rRNA	upstream_gene_variant	ENSCAFG00000021691	ENSCAFT00000033798						1942
7	40131609	T	C	317.2	C	NVL	3_prime_UTR_variant	ENSCAFG00000016360	ENSCAFT00000049264	3182							0/0	15	0/1	99	0/0	48	0/0	99
7	40313918	C	T	5521.52	T	TP53BP2	synonymous_variant	ENSCAFG00000016404	ENSCAFT00000026011	1458	1014	338	P	ccC/ccT			1/1	99	0/0	99	0/1	99	0/0	99
7	40313930	C	T	7003.52	T	TP53BP2	synonymous_variant	ENSCAFG00000016404	ENSCAFT00000026011	1470	1026	342	A	gcC/gcT			1/1	99	0/0	99	0/1	99	0/0	99
7	40314048	C	G	8454.52	G	TP53BP2	missense_variant	ENSCAFG00000016404	ENSCAFT00000026011	1588	1144	382	L/V	Ctc/Gtc		tolerated(0.41)	1/1	99	0/0	99	0/1	99	0/0	99
7	40847759	G	A	252.15	A		3_prime_UTR_variant	ENSCAFG00000030770	ENSCAFT00000044542	2715							0/0	99	0/0	99	0/0	99	0/1	99
7	40848540	C	T	1065.15	T		3_prime_UTR_variant	ENSCAFG00000030770	ENSCAFT00000044542	1934							0/0	99	0/0	99	0/1	99	0/0	90
7	40849230	G	A	420.15	A		3_prime_UTR_variant	ENSCAFG00000030770	ENSCAFT00000044542	1244							0/0	99	0/1	99	0/0	99	0/0	66
7	40853304	C	T	35.17	T		missense_variant	ENSCAFG00000030770	ENSCAFT00000044542	253	89	30	G/E	gGg/gAg		deleterious(0.01)	0/0	24	0/0	27	0/0	39	0/1	54
7	41100115	C	T	135.69	T	ARHGEF11	downstream_gene_variant	ENSCAFG00000016484	ENSCAFT00000026129						2858		0/0	24	0/1	24	./.	6	./.	.
7	41100115				T	ARHGEF11	downstream_gene_variant	ENSCAFG00000016484	ENSCAFT00000042811						2864
7	41100115				T	LRRC71	missense_variant	ENSCAFG00000016502	ENSCAFT00000026147	1663	1486	496	V/M	Gtg/Atg		deleterious(0.03)
7	41100115				T	ARHGEF11	downstream_gene_variant	ENSCAFG00000016484	ENSCAFT00000026135						2858
7	41100115				T	ARHGEF11	downstream_gene_variant	ENSCAFG00000016484	ENSCAFT00000046159						2858
7	41200663	G	T	1663.52	T	HDGF	intron_variant	ENSCAFG00000016741	ENSCAFT00000026503								1/1	84	0/0	99	0/1	99	0/0	99
7	41200663				T	PRCC	3_prime_UTR_variant	ENSCAFG00000016737	ENSCAFT00000026499	1711
7	41200663				T	SH2D2A	downstream_gene_variant	ENSCAFG00000023568	ENSCAFT00000043304						4214
7	41263300	T	C	746.15	C	ISG20L2	3_prime_UTR_variant	ENSCAFG00000016753	ENSCAFT00000026521	1633							0/0	99	0/0	99	0/0	99	0/1	99
7	41263839	G	A	630.3	A	ISG20L2	3_prime_UTR_variant	ENSCAFG00000016753	ENSCAFT00000026521	2172							1/1	42	./.	12	0/1	99	0/0	30
7	41746797	C	T	98.15	T		non_coding_exon_variant	ENSCAFG00000027020	ENSCAFT00000041303	36							0/1	99	0/0	99	0/0	99	0/0	93
7	41746797				T	MEX3A	synonymous_variant	ENSCAFG00000024440	ENSCAFT00000021835	198	198	66	G	ggC/ggT
7	41753114	C	A	1860.15	A	RAB25	3_prime_UTR_variant	ENSCAFG00000016866	ENSCAFT00000026699	1312							0/1	99	0/0	99	0/0	99	0/0	99
7	42000277	C	G	232.15	G		3_prime_UTR_variant	ENSCAFG00000016929	ENSCAFT00000026792	7222							0/0	99	0/0	99	0/0	63	0/1	99
7	42000277				G	MSTO1	missense_variant	ENSCAFG00000016938	ENSCAFT00000026803	1674	1674	558	E/D	gaG/gaC		tolerated(0.38)
7	42000277				G		downstream_gene_variant	ENSCAFG00000016929	ENSCAFT00000043894						483
7	42000277				G	MSTO1	intron_variant	ENSCAFG00000016938	ENSCAFT00000046496
7	42000502	G	T	109.15	T		3_prime_UTR_variant	ENSCAFG00000016929	ENSCAFT00000026792	7447							0/0	39	0/0	72	0/0	51	0/1	99
7	42000502				T	MSTO1	intron_variant	ENSCAFG00000016938	ENSCAFT00000026803
7	42000502				T		downstream_gene_variant	ENSCAFG00000016929	ENSCAFT00000043894						708
7	42000502				T	MSTO1	intron_variant	ENSCAFG00000016938	ENSCAFT00000046496
7	42233449	C	A	8496.52	A	ASH1L	downstream_gene_variant	ENSCAFG00000016944	ENSCAFT00000048670						3689		1/1	99	0/0	99	0/1	99	0/0	99
7	42233449				A	RUSC1	synonymous_variant	ENSCAFG00000016954	ENSCAFT00000026835	2544	2544	848	A	gcG/gcT
7	42378926	C	T	2356.15	T	EFNA1	synonymous_variant	ENSCAFG00000017069	ENSCAFT00000027032	21	21	7	P	ccG/ccA			0/0	99	0/0	99	0/1	99	0/0	99
7	42438006	C	G	203.15	G	ADAM15	missense_variant	ENSCAFG00000017100	ENSCAFT00000027093	2045	1086	362	L/F	ttG/ttC		deleterious(0.01)	0/1	99	0/0	99	0/0	99	0/0	99
7	42470278	G	T	2926.15	T	DCST2	downstream_gene_variant	ENSCAFG00000017119	ENSCAFT00000027117						3605		0/1	99	0/0	99	0/0	99	0/0	99
7	42470278				T	ZBTB7B	synonymous_variant	ENSCAFG00000017124	ENSCAFT00000027122	528	528	176	G	ggC/ggA
7	42470278				T	ZBTB7B	synonymous_variant	ENSCAFG00000017124	ENSCAFT00000042955	792	429	143	G	ggC/ggA
7	42522423	C	A	2492.15	A	PBXIP1	missense_variant	ENSCAFG00000017162	ENSCAFT00000027178	1762	1727	576	A/E	gCa/gAa		tolerated(0.53)	0/0	99	0/0	99	0/1	99	0/0	99
7	42813871	C	T	48.15	T	UBE2Q1	3_prime_UTR_variant	ENSCAFG00000017177	ENSCAFT00000027200	1916							0/0	90	0/0	45	0/1	81	0/0	99
7	42946632	C	G	143.16	G		intron_variant	ENSCAFG00000030928	ENSCAFT00000045855								0/0	24	0/0	93	0/0	99	0/1	99
7	42946632				G		missense_variant	ENSCAFG00000017197	ENSCAFT00000027242	1896	1896	632	Q/H	caG/caC		deleterious(0.03)
7	43066780	C	A	2743.15	A	NUP210L	upstream_gene_variant	ENSCAFG00000017362	ENSCAFT00000027524						1561		0/1	99	0/0	99	0/0	99	0/0	99
7	43066780				A	TPM3	3_prime_UTR_variant	ENSCAFG00000017311	ENSCAFT00000027452	1566
7	43185737	G	A	3109.19	A	DENND4B	5_prime_UTR_variant	ENSCAFG00000017416	ENSCAFT00000027606	167							0/0	27	./.	6	./.	6	1/1	99
7	43185737				A	CRTC2	downstream_gene_variant	ENSCAFG00000017402	ENSCAFT00000027576						1027
7	43597872	C	T	59.4	T		missense_variant	ENSCAFG00000029343	ENSCAFT00000046819	409	409	137	P/S	Ccg/Tcg		deleterious(0)	0/0	15	0/0	99	0/1	92	0/0	51
7	45380865	G	A	2263.15	A	SLC14A1	missense_variant	ENSCAFG00000017664	ENSCAFT00000037992	1274	1099	367	R/C	Cgc/Tgc		deleterious(0.01)	0/0	99	0/1	99	0/0	99	0/0	99
7	45386536	C	T	4593.15	T	SLC14A1	missense_variant	ENSCAFG00000017664	ENSCAFT00000037992	1094	919	307	A/T	Gcc/Acc		tolerated(0.28)	0/1	99	0/0	99	0/0	99	0/0	99
7	58457447	G	A	2969.38	A	DSC3	missense_variant	ENSCAFG00000018089	ENSCAFT00000028743	2488	2488	830	V/I	Gtc/Atc		tolerated(0.29)	./.	9	0/0	27	0/1	99	0/0	18
7	64451967	G	A	290.15	A	LAMA3	missense_variant	ENSCAFG00000018173	ENSCAFT00000028869	6728	6350	2117	T/I	aCt/aTt		tolerated(0.13)	0/0	75	0/0	96	0/0	99	0/1	99
7	64785751	T	C	98.17	C	NPC1	synonymous_variant	ENSCAFG00000018183	ENSCAFT00000028892	1674	1674	558	N	aaT/aaC			0/0	33	0/0	42	0/1	99	0/0	21
7	64785751				C	U6	downstream_gene_variant	ENSCAFG00000028399	ENSCAFT00000042682						2303
7	64795916	C	T	488.15	T	NPC1	synonymous_variant	ENSCAFG00000018183	ENSCAFT00000028892	2823	2823	941	S	tcC/tcT			0/0	99	0/0	99	0/1	99	0/0	81
7	64795916				T	C18orf8	downstream_gene_variant	ENSCAFG00000018191	ENSCAFT00000028903						3010
7	64795997	C	T	69.2	T	NPC1	synonymous_variant	ENSCAFG00000018183	ENSCAFT00000028892	2904	2904	968	N	aaC/aaT			0/0	45	0/0	39	0/1	99	0/0	42
7	64795997				T	C18orf8	downstream_gene_variant	ENSCAFG00000018191	ENSCAFT00000028903						2929
7	64803917	C	T	207.2	T	NPC1	downstream_gene_variant	ENSCAFG00000018183	ENSCAFT00000028892						1410		0/0	99	0/0	48	0/1	99	0/0	93
7	64803917				T	C18orf8	synonymous_variant	ENSCAFG00000018191	ENSCAFT00000028903	1350	1350	450	T	acG/acA
7	64853743	C	T	73.8	T	RIOK3	missense_variant	ENSCAFG00000018201	ENSCAFT00000028914	1036	298	100	E/K	Gaa/Aaa		tolerated(0.07)	./.	7	0/0	83	0/0	38	0/1	99
7	65123502	G	A	484.37	A		synonymous_variant	ENSCAFG00000028757	ENSCAFT00000048619	42	42	14	P	ccG/ccA			0/0	45	./.	9	0/1	99	0/0	81
7	65123502				A	CABLES1	synonymous_variant	ENSCAFG00000018207	ENSCAFT00000047170	1062	1062	354	P	ccC/ccT
7	65123502				A	CABLES1	synonymous_variant	ENSCAFG00000018207	ENSCAFT00000028927	684	684	228	P	ccC/ccT
7	66178985	G	C	1672.15	C	MIB1	3_prime_UTR_variant	ENSCAFG00000018239	ENSCAFT00000048950	3553							0/0	99	0/0	99	0/1	99	0/0	99
7	66178985				C	MIB1	downstream_gene_variant	ENSCAFG00000018239	ENSCAFT00000028973						761
7	66961697	G	A	1016.15	A	ROCK1	synonymous_variant	ENSCAFG00000018282	ENSCAFT00000029058	2964	2061	687	E	gaG/gaA			0/0	99	0/0	99	0/1	99	0/0	99
7	67540937	T	C	429.15	C	YES1	missense_variant	ENSCAFG00000018362	ENSCAFT00000029169	1585	1196	399	N/S	aAc/aGc		deleterious(0)	0/0	99	0/0	99	0/1	99	0/0	99
7	70046383	C	T	7244.51	T		synonymous_variant	ENSCAFG00000018511	ENSCAFT00000029388	129	129	43	D	gaC/gaT			0/0	99	./.	6	./.	6	1/1	99
7	74301366	C	T	364.15	T	PTPRM	synonymous_variant	ENSCAFG00000018639	ENSCAFT00000029630	1985	1596	532	P	ccC/ccT			0/0	54	0/0	99	0/0	87	0/1	99
7	74301366				T	PTPRM	synonymous_variant	ENSCAFG00000018639	ENSCAFT00000029618	1593	1593	531	P	ccC/ccT
7	74959915	G	A	723.16	A	SOGA2	missense_variant	ENSCAFG00000018683	ENSCAFT00000029651	3847	3847	1283	A/T	Gcg/Acg		tolerated(0.7)	0/0	99	0/0	99	0/0	99	0/1	99
7	74959915				A	SOGA2	missense_variant	ENSCAFG00000018683	ENSCAFT00000047993	1723	1723	575	A/T	Gcg/Acg		tolerated(1)
7	74959915				A	SOGA2	missense_variant	ENSCAFG00000018683	ENSCAFT00000045245	3895	3475	1159	A/T	Gcg/Acg		tolerated(0.63)
7	74959926	C	T	545.16	T	SOGA2	synonymous_variant	ENSCAFG00000018683	ENSCAFT00000029651	3858	3858	1286	A	gcC/gcT			0/0	99	0/0	99	0/0	99	0/1	99
7	74959926				T	SOGA2	synonymous_variant	ENSCAFG00000018683	ENSCAFT00000047993	1734	1734	578	A	gcC/gcT
7	74959926				T	SOGA2	synonymous_variant	ENSCAFG00000018683	ENSCAFT00000045245	3906	3486	1162	A	gcC/gcT
7	75290462	G	T	440.15	T	ANKRD12	missense_variant	ENSCAFG00000018691	ENSCAFT00000047775	3667	3449	1150	G/V	gGg/gTg		tolerated(0.13)	0/1	99	0/0	99	0/0	99	0/0	99
7	75290462				T	ANKRD12	missense_variant	ENSCAFG00000018691	ENSCAFT00000029672	3518	3518	1173	G/V	gGg/gTg		tolerated(0.14)
7	75678989	C	G	32.55	G	RAB31	upstream_gene_variant	ENSCAFG00000018727	ENSCAFT00000029725						24		./.	3	0/1	64	0/0	18	./.	9
7	75678989				G		splice_region_variant	ENSCAFG00000031565	ENSCAFT00000043855	624	624	208	G	ggG/ggC
7	77654054	G	A	60.33	A		non_coding_exon_variant	ENSCAFG00000018823	ENSCAFT00000029882	1232							0/1	35	./.	3	./.	6	0/1	57
7	78074241	G	A	326.16	A	CEP76	synonymous_variant	ENSCAFG00000018851	ENSCAFT00000029925	1606	1606	536	L	Ctg/Ttg			0/0	51	0/0	99	0/0	99	0/1	99
7	78179619	A	G	2640.15	G	PTPN2	synonymous_variant	ENSCAFG00000018862	ENSCAFT00000029949	765	765	255	Y	taT/taC			0/0	99	0/0	99	0/0	99	0/1	99
7	78179619				G	PTPN2	synonymous_variant	ENSCAFG00000018862	ENSCAFT00000043468	1020	765	255	Y	taT/taC
7	78465948	A	G	473.15	G	SEH1L	synonymous_variant	ENSCAFG00000018880	ENSCAFT00000029969	2742	2742	914	S	tcA/tcG			0/0	39	0/0	99	0/0	99	0/1	99
7	78465948				G	SEH1L	synonymous_variant	ENSCAFG00000018880	ENSCAFT00000029956	3951	3951	1317	S	tcA/tcG
7	78465948				G		intron_variant	ENSCAFG00000031370	ENSCAFT00000048760
7	78603143	G	A	387.15	A	MBD1	missense_variant	ENSCAFG00000018928	ENSCAFT00000030047	541	541	181	E/K	Gag/Aag		tolerated(0.11)	0/1	99	0/0	99	0/0	99	0/0	99
7	78603143				A	MBD1	missense_variant	ENSCAFG00000018928	ENSCAFT00000030049	610	610	204	E/K	Gag/Aag		tolerated(0.15)
7	79265867	A	G	4225.15	G	SNORD58	downstream_gene_variant	ENSCAFG00000025841	ENSCAFT00000040124						788		0/1	99	0/0	99	0/0	99	0/0	99
7	79265867				G		synonymous_variant	ENSCAFG00000019044	ENSCAFT00000030248	129	129	43	K	aaA/aaG
7	79265867				G	SNORD58	downstream_gene_variant	ENSCAFG00000025886	ENSCAFT00000040169						1220
7	79265867				G	SNORD58	upstream_gene_variant	ENSCAFG00000021934	ENSCAFT00000034041						160
7	80484823	C	T	419.89	T	ZBTB7C	missense_variant	ENSCAFG00000019080	ENSCAFT00000030295	757	757	253	P/S	Ccg/Tcg		deleterious(0)	./.	3	0/0	99	0/1	99	0/0	99
7	80965609	C	A	330.96	A		upstream_gene_variant	ENSCAFG00000032276	ENSCAFT00000046625						621		0/1	99	0/1	29	0/1	30	./.	.
7	80965609				A		intron_variant	ENSCAFG00000029384	ENSCAFT00000043311
7	80965609				A		non_coding_exon_variant	ENSCAFG00000031948	ENSCAFT00000048700	10
7	80965609				A		downstream_gene_variant	ENSCAFG00000032666	ENSCAFT00000050026						181
7	80965609				A		missense_variant	ENSCAFG00000031490	ENSCAFT00000047905	371	371	124	R/L	cGg/cTg
8	82877	C	T	537.32	T		non_coding_exon_variant	ENSCAFG00000030290	ENSCAFT00000044800	239							0/1	54	0/1	59	0/1	16	0/1	67
8	315104	C	A	149.42	A	NLRP3	3_prime_UTR_variant	ENSCAFG00000010686	ENSCAFT00000017002	5761							0/1	40	0/1	40	0/1	99	0/0	33
8	315400	T	G	79.53	G	NLRP3	3_prime_UTR_variant	ENSCAFG00000010686	ENSCAFT00000017002	6057							0/1	79	0/0	21	./.	10	0/1	37
8	315446	T	G	223.29	G	NLRP3	3_prime_UTR_variant	ENSCAFG00000010686	ENSCAFT00000017002	6103							0/1	18	0/1	99	0/1	86	./.	9
8	909093	T	G	35.07	G	CATSPERB	3_prime_UTR_variant	ENSCAFG00000010820	ENSCAFT00000017205	5212							0/0	30	0/0	42	0/0	30	0/1	67
8	1283326	C	G	347.15	G	TRIP11	missense_variant	ENSCAFG00000010880	ENSCAFT00000017298	2017	2017	673	A/P	Gcc/Ccc		tolerated(0.27)	0/1	99	0/0	99	0/0	99	0/0	99
8	1319739	A	G	222.15	G		downstream_gene_variant	ENSCAFG00000010893	ENSCAFT00000017315						3198		0/1	99	0/0	99	0/0	99	0/0	99
8	1319739				G		3_prime_UTR_variant	ENSCAFG00000010893	ENSCAFT00000045473	2826
8	1321514	T	C	43.15	C		downstream_gene_variant	ENSCAFG00000010893	ENSCAFT00000017315						1423		0/0	97	0/0	81	0/0	99	0/1	76
8	1321514				C		3_prime_UTR_variant	ENSCAFG00000010893	ENSCAFT00000045473	1051
8	1886838	G	A	118.15	A	GOLGA5	missense_variant	ENSCAFG00000011030	ENSCAFT00000017571	1052	1022	341	S/N	aGc/aAc		tolerated(0.28)	0/1	99	0/0	99	0/0	99	0/0	99
8	1970707	G	C	992.6	C	CHGA	missense_variant	ENSCAFG00000024864	ENSCAFT00000038439	808	758	253	R/P	cGg/cCg		tolerated(0.09)	1/1	30	1/1	39	1/1	15	0/0	99
8	1976954	A	T	1361.15	T	CHGA	downstream_gene_variant	ENSCAFG00000024864	ENSCAFT00000038439						3510		0/1	99	0/0	99	0/0	99	0/0	99
8	1976954				T	ITPK1	3_prime_UTR_variant	ENSCAFG00000011056	ENSCAFT00000044011	2392
8	2794791	C	T	269.32	T	TRDV2	3_prime_UTR_variant	ENSCAFG00000029180	ENSCAFT00000049115	2844							./.	.	0/1	99	0/1	27	./.	6
8	2794848	G	C	86.42	C	TRDV2	3_prime_UTR_variant	ENSCAFG00000029180	ENSCAFT00000049115	2901							0/1	99	0/0	19	0/0	60	./.	6
8	3597660	C	G	32.15	G	SLC22A17	synonymous_variant	ENSCAFG00000025390	ENSCAFT00000018313	559	390	130	L	ctG/ctC			0/1	65	0/0	39	0/0	48	0/0	42
8	3597660				G	EFS	downstream_gene_variant	ENSCAFG00000011605	ENSCAFT00000018413						2865
8	3604018	G	A	567.15	A	SLC22A17	upstream_gene_variant	ENSCAFG00000025390	ENSCAFT00000018313						3572		0/0	99	0/0	99	0/0	99	0/1	99
8	3604018				A	EFS	3_prime_UTR_variant	ENSCAFG00000011605	ENSCAFT00000018413	3186
8	3785360	G	A	418.15	A	THTPA	downstream_gene_variant	ENSCAFG00000011651	ENSCAFT00000018490						966		0/0	63	0/0	99	0/0	99	0/1	99
8	3785360				A	AP1G2	missense_variant	ENSCAFG00000011529	ENSCAFT00000018396	2285	2284	762	R/C	Cgc/Tgc		deleterious(0)
8	4153440	C	T	1832.15	T	IRF9	synonymous_variant	ENSCAFG00000012007	ENSCAFT00000019065	75	75	25	F	ttC/ttT			0/0	99	0/0	99	0/0	99	0/1	99
8	4153440				T		downstream_gene_variant	ENSCAFG00000011993	ENSCAFT00000019055						1533
8	4387553	G	A	66.15	A	NYNRIN	missense_variant	ENSCAFG00000012390	ENSCAFT00000019681	5423	5423	1808	R/Q	cGg/cAg		tolerated(0.22)	0/0	99	0/0	99	0/0	99	0/1	99
8	4387553				A	NYNRIN	missense_variant	ENSCAFG00000012390	ENSCAFT00000019674	5739	5462	1821	R/Q	cGg/cAg		tolerated(0.26)
8	4405296	G	A	8677.74	A	7SK	downstream_gene_variant	ENSCAFG00000021342	ENSCAFT00000033449						1870		0/0	99	0/0	99	0/0	99	1/1	99
8	4405296				A	CBLN3	upstream_gene_variant	ENSCAFG00000028667	ENSCAFT00000048940						2857
8	4405296				A	KHNYN	synonymous_variant	ENSCAFG00000012409	ENSCAFT00000019723	968	948	316	S	tcG/tcA
8	10653662	C	T	40.35	T	POLR2K	synonymous_variant	ENSCAFG00000032117	ENSCAFT00000049016	171	171	57	A	gcC/gcT			./.	6	0/0	21	./.	3	0/1	32
8	10653662				T	HEATR5A	intron_variant	ENSCAFG00000013026	ENSCAFT00000020840
8	15240557	T	A	48.25	A	SLC25A21	3_prime_UTR_variant	ENSCAFG00000028962	ENSCAFT00000044282	1126							0/0	48	0/0	33	./.	12	0/1	81
8	15240557				A	PAX9	downstream_gene_variant	ENSCAFG00000013690	ENSCAFT00000021704						3879
8	16572653	G	A	2688.41	A	SSTR1	missense_variant	ENSCAFG00000013755	ENSCAFT00000021824	544	544	182	V/M	Gtg/Atg		tolerated(0.13)	./.	6	1/1	99	0/1	99	0/0	42
8	17358080	A	T	1014.15	T	PNN	synonymous_variant	ENSCAFG00000013878	ENSCAFT00000022021	699	699	233	I	atA/atT			0/0	99	0/0	99	0/0	99	0/1	99
8	17462124	A	G	526.15	G		synonymous_variant	ENSCAFG00000013883	ENSCAFT00000043499	2302	1509	503	S	tcA/tcG			0/0	33	0/0	99	0/0	48	0/1	99
8	17462124				G		synonymous_variant	ENSCAFG00000013883	ENSCAFT00000022080	3165	3165	1055	S	tcA/tcG
8	22420924	C	T	918.15	T	FAM179B	5_prime_UTR_variant	ENSCAFG00000014001	ENSCAFT00000022221	638							0/0	45	0/0	99	0/1	99	0/0	99
8	22420924				T	KLHL28	upstream_gene_variant	ENSCAFG00000013977	ENSCAFT00000022177						3000
8	29998170	T	C	162.15	C	BMP4	missense_variant	ENSCAFG00000014880	ENSCAFT00000023624	1148	880	294	S/G	Agc/Ggc		tolerated(0.13)	0/0	99	0/0	99	0/0	99	0/1	99
8	31473832	C	A	739.04	A		missense_variant	ENSCAFG00000015193	ENSCAFT00000024118	572	572	191	C/F	tGt/tTt		tolerated(1)	1/1	21	1/1	15	0/1	34	1/1	21
8	31473863	G	C	873.98	C		missense_variant	ENSCAFG00000015193	ENSCAFT00000024118	541	541	181	L/V	Ctg/Gtg		tolerated(0.39)	1/1	27	1/1	18	0/1	33	1/1	21
8	32306281	G	A	283.15	A	TMEM260	3_prime_UTR_variant	ENSCAFG00000015204	ENSCAFT00000024141	2783							0/0	99	0/1	99	0/0	99	0/0	99
8	35737654	C	T	31.23	T	SIX4	3_prime_UTR_variant	ENSCAFG00000015627	ENSCAFT00000047206	4167							0/0	99	0/1	64	0/0	57	0/0	13
8	35737654				T	SIX4	3_prime_UTR_variant	ENSCAFG00000015627	ENSCAFT00000024760	4197
8	35737654				T	SIX4	3_prime_UTR_variant	ENSCAFG00000015627	ENSCAFT00000049537	4089
8	35738593	T	C	837.15	C	SIX4	3_prime_UTR_variant	ENSCAFG00000015627	ENSCAFT00000047206	3228							0/1	99	0/0	99	0/0	99	0/0	93
8	35738593				C	SIX4	3_prime_UTR_variant	ENSCAFG00000015627	ENSCAFT00000024760	3258
8	35738593				C	SIX4	3_prime_UTR_variant	ENSCAFG00000015627	ENSCAFT00000049537	3150
8	38579288	A	G	31.97	G	SYNE2	missense_variant	ENSCAFG00000015819	ENSCAFT00000025088	16018	15610	5204	N/D	Aat/Gat		tolerated(0.13)	0/0	21	0/1	64	0/0	39	./.	.
8	38863993	A	G	91.16	G	MTHFD1	missense_variant	ENSCAFG00000015967	ENSCAFT00000025366	1216	1216	406	I/V	Atc/Gtc		tolerated(0.09)	0/1	99	0/0	45	0/0	77	0/0	81
8	38863993				G	MTHFD1	missense_variant	ENSCAFG00000015967	ENSCAFT00000025384	1183	1183	395	I/V	Atc/Gtc		tolerated(0.09)
8	39142173	C	T	5366.15	T	PLEKHG3	synonymous_variant	ENSCAFG00000016048	ENSCAFT00000025462	771	771	257	A	gcC/gcT			0/0	99	0/0	99	0/1	99	0/0	99
8	39142173				T	PLEKHG3	synonymous_variant	ENSCAFG00000016048	ENSCAFT00000025461	1575	771	257	A	gcC/gcT
8	39153513	C	T	5301.15	T	PLEKHG3	synonymous_variant	ENSCAFG00000016048	ENSCAFT00000025462	2985	2985	995	P	ccC/ccT			0/0	99	0/0	99	0/1	99	0/0	99
8	39153513				T	PLEKHG3	synonymous_variant	ENSCAFG00000016048	ENSCAFT00000025461	4176	3372	1124	P	ccC/ccT
8	41254834	T	C	150.15	C		synonymous_variant	ENSCAFG00000032149	ENSCAFT00000049268	516	516	172	R	cgA/cgG			0/0	48	0/0	99	0/0	39	0/1	99
8	41516233	C	T	788.82	T	PLEKHH1	5_prime_UTR_variant	ENSCAFG00000016410	ENSCAFT00000026029	285							1/1	30	0/0	99	0/0	99	0/0	99
8	41614121	G	A	1658.52	A	ARG2	missense_variant	ENSCAFG00000016428	ENSCAFT00000026049	403	395	132	R/Q	cGg/cAg		tolerated(0.66)	1/1	99	0/0	99	0/0	99	0/0	72
8	41614121				A	ARG2	missense_variant	ENSCAFG00000016428	ENSCAFT00000045543	1166	395	132	R/Q	cGg/cAg		tolerated(0.3)
8	41729140	G	A	743.76	A	ZFYVE26	missense_variant	ENSCAFG00000016464	ENSCAFT00000026109	6231	6082	2028	R/C	Cgc/Tgc		deleterious(0)	0/1	91	0/0	57	0/1	99	0/0	33
8	41763659	C	T	416.15	T	ZFYVE26	missense_variant	ENSCAFG00000016464	ENSCAFT00000026109	2125	1976	659	G/E	gGg/gAg		tolerated(1)	0/0	30	0/0	99	0/1	99	0/0	45
8	43247484	G	T	186.15	T	SLC39A9	missense_variant	ENSCAFG00000016572	ENSCAFT00000026247	127	127	43	A/S	Gct/Tct		tolerated(0.06)	0/1	99	0/0	99	0/0	99	0/0	99
8	48257060	C	G	1204.15	G	TMED10	synonymous_variant	ENSCAFG00000017034	ENSCAFT00000026979	123	123	41	L	ctG/ctC			0/1	99	0/0	99	0/0	99	0/0	99
8	48333962	G	A	1816.15	A	FOS	3_prime_UTR_variant	ENSCAFG00000017040	ENSCAFT00000026984	1828							0/0	99	0/0	99	0/0	99	0/1	99
8	52685644	G	A	59.96	A	DIO2	3_prime_UTR_variant	ENSCAFG00000032243	ENSCAFT00000044792	1422							./.	6	0/1	89	0/0	42	./.	.
8	53520596	G	A	45.1	A	GTF2A1	3_prime_UTR_variant	ENSCAFG00000017305	ENSCAFT00000047079	5877							0/1	20	./.	12	0/1	20	0/1	44
8	53520596				A	GTF2A1	downstream_gene_variant	ENSCAFG00000017305	ENSCAFT00000027417						4250
8	59658384	G	C	516.53	C	SPATA7	5_prime_UTR_variant	ENSCAFG00000017354	ENSCAFT00000027497	158							0/0	30	0/0	30	0/0	42	0/1	99
8	59697185	A	G	1293.74	G	SPATA7	missense_variant	ENSCAFG00000017354	ENSCAFT00000027497	1913	1706	569	Q/R	cAg/cGg		tolerated(0.07)	1/1	99	0/0	81	0/0	84	0/0	99
8	59707266	G	T	627.53	T	SPATA7	intron_variant	ENSCAFG00000017354	ENSCAFT00000027497								0/0	54	0/1	99	1/1	42	0/0	24
8	59707266				T	PTPN21	3_prime_UTR_variant	ENSCAFG00000017377	ENSCAFT00000027536	5737
8	59707902	G	T	1638.74	T	SPATA7	intron_variant	ENSCAFG00000017354	ENSCAFT00000027497								1/1	99	0/0	99	0/0	99	0/0	99
8	59707902				T	PTPN21	3_prime_UTR_variant	ENSCAFG00000017377	ENSCAFT00000027536	5101
8	59708030	G	A	1452.74	A	SPATA7	intron_variant	ENSCAFG00000017354	ENSCAFT00000027497								1/1	99	0/0	54	0/0	99	0/0	84
8	59708030				A	PTPN21	3_prime_UTR_variant	ENSCAFG00000017377	ENSCAFT00000027536	4973
8	59708456	G	C	2016.74	C	SPATA7	intron_variant	ENSCAFG00000017354	ENSCAFT00000027497								1/1	99	0/0	99	0/0	99	0/0	99
8	59708456				C	PTPN21	3_prime_UTR_variant	ENSCAFG00000017377	ENSCAFT00000027536	4547
8	59720186	G	C	797.74	C	SPATA7	intron_variant	ENSCAFG00000017354	ENSCAFT00000027497								1/1	63	0/0	60	0/0	99	0/0	69
8	59720186				C	PTPN21	synonymous_variant	ENSCAFG00000017377	ENSCAFT00000027536	2028	2028	676	G	ggC/ggG
8	61539681	G	A	525.15	A	TTC7B	synonymous_variant	ENSCAFG00000017525	ENSCAFT00000045213	3055	2241	747	I	atC/atT			0/0	99	0/0	69	0/0	36	0/1	99
8	61539681				A	TTC7B	synonymous_variant	ENSCAFG00000017525	ENSCAFT00000027766	2007	2007	669	I	atC/atT
8	61550761	C	T	578.2	T	TTC7B	synonymous_variant	ENSCAFG00000017525	ENSCAFT00000045213	2953	2139	713	V	gtG/gtA			0/0	99	0/0	99	0/0	99	0/1	99
8	61550761				T	TTC7B	synonymous_variant	ENSCAFG00000017525	ENSCAFT00000027766	1905	1905	635	V	gtG/gtA
8	62126102	G	A	721.15	A	CCDC88C	missense_variant	ENSCAFG00000017561	ENSCAFT00000048191	5219	5117	1706	P/L	cCg/cTg		tolerated(0.08)	0/0	39	0/0	39	0/1	99	0/0	63
8	62126102				A	CCDC88C	missense_variant	ENSCAFG00000017561	ENSCAFT00000027835	5219	5117	1706	P/L	cCg/cTg		tolerated(0.08)
8	62305984	G	A	7700.74	A	SMEK1	missense_variant	ENSCAFG00000017570	ENSCAFT00000027870	2465	2465	822	T/M	aCg/aTg		deleterious(0.02)	0/0	99	0/0	99	0/0	99	1/1	99
8	63980451	C	A	704.15	A	DICER1	missense_variant	ENSCAFG00000017701	ENSCAFT00000028082	4848	4848	1616	K/N	aaG/aaT		tolerated(0.53)	0/0	99	0/1	99	0/0	99	0/0	99
8	64321281	G	A	337.42	A	SYNE3	synonymous_variant	ENSCAFG00000017714	ENSCAFT00000028095	311	213	71	L	ctC/ctT			./.	9	./.	9	0/0	99	1/1	30
8	65076710	G	T	65.15	T	ATG2B	missense_variant	ENSCAFG00000017729	ENSCAFT00000028127	3574	2842	948	P/T	Cct/Act		deleterious(0)	0/1	98	0/0	69	0/0	99	0/0	84
8	68293217	C	T	1502.15	T	EML1	synonymous_variant	ENSCAFG00000017867	ENSCAFT00000028371	2214	2124	708	D	gaC/gaT			0/0	99	0/0	99	0/0	99	0/1	99
8	68293217				T	EML1	synonymous_variant	ENSCAFG00000017867	ENSCAFT00000028368	2220	2220	740	D	gaC/gaT
8	68787602	C	T	646.15	T	WDR25	3_prime_UTR_variant	ENSCAFG00000017915	ENSCAFT00000028431	2519							0/0	51	0/0	63	0/0	45	0/1	99
8	68787602				T	WDR25	downstream_gene_variant	ENSCAFG00000017915	ENSCAFT00000028429						22
8	69966842	A	C	4918.15	C	PPP2R5C	3_prime_UTR_variant	ENSCAFG00000017948	ENSCAFT00000028498	1538							0/0	99	0/1	99	0/0	99	0/0	99
8	69966842				C	PPP2R5C	downstream_gene_variant	ENSCAFG00000017948	ENSCAFT00000028497						83
8	71357589	A	G	57.06	G	APOPT1	3_prime_UTR_variant	ENSCAFG00000030884	ENSCAFT00000049061	1612							./.	.	0/1	27	0/1	26	0/1	35
8	71358986	A	G	66.53	G	APOPT1	3_prime_UTR_variant	ENSCAFG00000030884	ENSCAFT00000049061	3009							./.	6	./.	6	0/1	30	0/1	62
8	71434332	G	T	127.15	T		downstream_gene_variant	ENSCAFG00000018285	ENSCAFT00000029047						2242		0/1	99	0/0	57	0/0	99	0/0	36
8	71434332				T		missense_variant	ENSCAFG00000018285	ENSCAFT00000029048	1646	1646	549	G/V	gGc/gTc		deleterious(0.03)
8	72277182	C	T	446.91	T		downstream_gene_variant	ENSCAFG00000028959	ENSCAFT00000046126						3031		0/0	63	0/0	42	1/1	39	0/0	30
8	72277182				T	INF2	downstream_gene_variant	ENSCAFG00000018333	ENSCAFT00000029124						3088
8	72277182				T	INF2	synonymous_variant	ENSCAFG00000018333	ENSCAFT00000029127	2241	2232	744	V	gtC/gtT
8	72317957	G	A	2911.15	A	AKT1	3_prime_UTR_variant	ENSCAFG00000018354	ENSCAFT00000029177	1833							0/0	99	0/0	99	0/0	99	0/1	99
8	72318092	G	A	661.06	A	AKT1	3_prime_UTR_variant	ENSCAFG00000018354	ENSCAFT00000029177	1698							./.	9	./.	11	0/0	83	0/1	99
8	72318334	C	T	276.18	T	AKT1	synonymous_variant	ENSCAFG00000018354	ENSCAFT00000029177	1567	1350	450	T	acG/acA			0/0	75	0/0	99	0/0	99	0/1	99
8	72428680	C	A	790.04	A		missense_variant	ENSCAFG00000030662	ENSCAFT00000046504	319	71	24	S/I	aGc/aTc		deleterious(0)	1/1	27	1/1	36	0/0	99	0/0	33
8	72544894	G	A	248.18	A	JAG2	synonymous_variant	ENSCAFG00000018401	ENSCAFT00000029230	402	402	134	C	tgC/tgT			0/0	99	0/0	18	0/0	99	0/1	99
9	245123	A	G	409.15	G	FASN	missense_variant	ENSCAFG00000006006	ENSCAFT00000009737	5221	5221	1741	T/A	Acg/Gcg		deleterious(0)	0/0	99	0/0	99	0/1	99	0/0	99
9	245123				G	RFNG	intron_variant	ENSCAFG00000005933	ENSCAFT00000009582
9	249067	C	T	3428.15	T	FASN	missense_variant	ENSCAFG00000006006	ENSCAFT00000009737	7532	7532	2511	P/L	cCg/cTg		deleterious(0.01)	0/0	99	0/0	99	0/0	99	0/1	99
9	249067				T	RFNG	intron_variant	ENSCAFG00000005933	ENSCAFT00000009582
9	360878	C	T	71.16	T	MYADML2	downstream_gene_variant	ENSCAFG00000005911	ENSCAFT00000009541						4001		0/0	66	0/0	24	0/0	99	0/1	99
9	360878				T	PYCR1	synonymous_variant	ENSCAFG00000005906	ENSCAFT00000009529	75	75	25	V	gtC/gtT
9	360878				T	TSPAN10	intron_variant	ENSCAFG00000005765	ENSCAFT00000009296
9	362472	G	C	1562.15	C	PYCR1	missense_variant	ENSCAFG00000005906	ENSCAFT00000009529	549	549	183	E/D	gaG/gaC		deleterious(0.01)	0/1	99	0/0	99	0/0	99	0/0	99
9	362472				C	TSPAN10	intron_variant	ENSCAFG00000005765	ENSCAFT00000009296
9	603872	G	C	183.15	C	NPLOC4	downstream_gene_variant	ENSCAFG00000005759	ENSCAFT00000009294						727		0/0	78	0/1	99	0/0	99	0/0	48
9	603872				C	C17orf70	upstream_gene_variant	ENSCAFG00000005752	ENSCAFT00000047669						3231
9	603872				C	NPLOC4	3_prime_UTR_variant	ENSCAFG00000005759	ENSCAFT00000046638	2458
9	603872				C	C17orf70	upstream_gene_variant	ENSCAFG00000005752	ENSCAFT00000009275						3344
9	869177	G	A	166.46	A	AZI1	missense_variant	ENSCAFG00000005711	ENSCAFT00000009210	193	193	65	G/R	Ggg/Agg		tolerated(0.06)	0/0	21	0/0	15	0/0	39	0/1	94
9	922238	G	A	357.3	A	AATK	missense_variant	ENSCAFG00000005705	ENSCAFT00000009194	1982	1849	617	G/R	Ggg/Agg		tolerated(0.25)	./.	6	./.	3	0/0	99	0/1	99
9	922238				A	BAIAP2	downstream_gene_variant	ENSCAFG00000005700	ENSCAFT00000009191						1587
9	922238				A	cfa-mir-338	downstream_gene_variant	ENSCAFG00000020460	ENSCAFT00000032567						3528
9	1209094	G	A	33.67	A	RPTOR	synonymous_variant	ENSCAFG00000005692	ENSCAFT00000009182	504	504	168	N	aaC/aaT			./.	9	0/0	30	0/0	24	0/1	31
9	1486579	C	T	196.15	T	RNF213	synonymous_variant	ENSCAFG00000005675	ENSCAFT00000045693	3336	3198	1066	P	ccG/ccA			0/0	99	0/0	99	0/0	99	0/1	99
9	1486579				T	RNF213	synonymous_variant	ENSCAFG00000005675	ENSCAFT00000009155	3219	3219	1073	P	ccG/ccA
9	1546893	T	A	392.15	A	CARD14	downstream_gene_variant	ENSCAFG00000005636	ENSCAFT00000009068						1585		0/0	78	0/0	63	0/0	99	0/1	99
9	1546893				A	SGSH	3_prime_UTR_variant	ENSCAFG00000005640	ENSCAFT00000009079	1694
9	1730945	C	T	938.18	T	TBC1D16	3_prime_UTR_variant	ENSCAFG00000005578	ENSCAFT00000008982	4508							0/0	18	0/0	99	0/0	99	0/1	99
9	1841448	G	C	781.15	C	CBX8	missense_variant	ENSCAFG00000031851	ENSCAFT00000044678	665	489	163	E/D	gaG/gaC		tolerated(0.6)	0/0	99	0/0	99	0/0	99	0/1	99
9	2794456	C	A	1876.56	A	DNAH17	missense_variant	ENSCAFG00000005442	ENSCAFT00000008781	11080	10772	3591	T/K	aCg/aAg		deleterious(0.03)	0/0	18	./.	12	1/1	99	./.	3
9	2970947	A	G	145.17	G	SYNGR2	downstream_gene_variant	ENSCAFG00000005287	ENSCAFT00000008523						2537		./.	.	0/1	29	0/1	99	./.	.
9	2970947				G	TK1	3_prime_UTR_variant	ENSCAFG00000005294	ENSCAFT00000008537	2066
9	3003817	T	C	1618.2	C	TMC8	upstream_gene_variant	ENSCAFG00000005275	ENSCAFT00000008513						4330		./.	12	0/0	24	0/1	99	./.	.
9	3003817				C	TMC6	missense_variant	ENSCAFG00000005252	ENSCAFT00000008492	170	170	57	L/P	cTa/cCa		tolerated(0.28)
9	3503977	G	A	968.15	A	2015-09-09	synonymous_variant	ENSCAFG00000005190	ENSCAFT00000008383	1350	1350	450	F	ttC/ttT			0/0	99	0/0	99	0/0	99	0/1	99
9	3503977				A	2015-09-09	synonymous_variant	ENSCAFG00000005190	ENSCAFT00000047802	1675	1389	463	F	ttC/ttT
9	3562005	C	G	8656.74	G	2015-09-09	synonymous_variant	ENSCAFG00000005190	ENSCAFT00000008383	270	270	90	S	tcG/tcC			0/0	99	0/0	99	1/1	99	0/0	99
9	3562005				G	2015-09-09	synonymous_variant	ENSCAFG00000005190	ENSCAFT00000047802	595	309	103	S	tcG/tcC
9	4235324	G	A	298.15	A	RHBDF2	synonymous_variant	ENSCAFG00000005097	ENSCAFT00000008200	1750	1554	518	A	gcG/gcA			0/0	99	0/0	57	0/0	69	0/1	99
9	4235324				A	AANAT	downstream_gene_variant	ENSCAFG00000005090	ENSCAFT00000008185						3960
9	4617958	C	G	858.29	G		5_prime_UTR_variant	ENSCAFG00000005021	ENSCAFT00000046353	579							0/1	99	0/0	15	0/0	63	./.	.
9	4617958				G		intron_variant	ENSCAFG00000005021	ENSCAFT00000008073
9	4768375	T	C	1235.52	C	UNK	3_prime_UTR_variant	ENSCAFG00000004925	ENSCAFT00000007926	3276							0/1	99	1/1	81	0/0	54	0/0	48
9	4768375				C	UNC13D	intron_variant	ENSCAFG00000004938	ENSCAFT00000038364
9	4768375				C	UNC13D	downstream_gene_variant	ENSCAFG00000004938	ENSCAFT00000007945						2376
9	4977349	G	A	10817.5	A	LLGL2	synonymous_variant	ENSCAFG00000004816	ENSCAFT00000007782	2636	2616	872	D	gaC/gaT			0/1	99	1/1	99	0/0	99	0/0	99
9	5010538	G	T	1888.56	T	TSEN54	synonymous_variant	ENSCAFG00000004798	ENSCAFT00000007733	1399	1399	467	R	Cga/Aga			0/1	99	1/1	99	0/0	33	0/0	29
9	5029052	C	T	559.15	T	KIAA0195	downstream_gene_variant	ENSCAFG00000004774	ENSCAFT00000046347						3534		0/0	75	0/0	99	0/0	99	0/1	99
9	5029052				T	CASKIN2	missense_variant	ENSCAFG00000004787	ENSCAFT00000007714	3004	2312	771	P/L	cCa/cTa		tolerated(0.08)
9	5029052				T	KIAA0195	downstream_gene_variant	ENSCAFG00000004774	ENSCAFT00000007695						3534
9	5029070	G	A	482.15	A	KIAA0195	downstream_gene_variant	ENSCAFG00000004774	ENSCAFT00000046347						3516		0/0	75	0/0	99	0/0	99	0/1	99
9	5029070				A	CASKIN2	missense_variant	ENSCAFG00000004787	ENSCAFT00000007714	3022	2330	777	R/H	cGt/cAt		tolerated(0.1)
9	5029070				A	KIAA0195	downstream_gene_variant	ENSCAFG00000004774	ENSCAFT00000007695						3516
9	5030008	G	A	266.62	A	KIAA0195	downstream_gene_variant	ENSCAFG00000004774	ENSCAFT00000046347						2578		0/1	24	./.	5	0/0	15	./.	3
9	5030008				A	CASKIN2	missense_variant	ENSCAFG00000004787	ENSCAFT00000007714	3960	3268	1090	A/T	Gct/Act		tolerated(0.59)
9	5030008				A	KIAA0195	downstream_gene_variant	ENSCAFG00000004774	ENSCAFT00000007695						2578
9	5031324	G	T	1027.64	T	KIAA0195	downstream_gene_variant	ENSCAFG00000004774	ENSCAFT00000046347						1262		0/1	99	1/1	60	0/0	30	0/0	18
9	5031324				T	CASKIN2	3_prime_UTR_variant	ENSCAFG00000004787	ENSCAFT00000007714	4754
9	5031324				T	KIAA0195	downstream_gene_variant	ENSCAFG00000004774	ENSCAFT00000007695						1262
9	5037916	C	T	687.57	T	KIAA0195	synonymous_variant	ENSCAFG00000004774	ENSCAFT00000046347	2311	2205	735	V	gtG/gtA			0/1	99	1/1	39	0/0	39	0/0	63
9	5037916				T	CASKIN2	downstream_gene_variant	ENSCAFG00000004787	ENSCAFT00000007714						4071
9	5037916				T	KIAA0195	synonymous_variant	ENSCAFG00000004774	ENSCAFT00000007695	2229	2229	743	V	gtG/gtA
9	5117255	C	T	3341.15	T	GRB2	5_prime_UTR_variant	ENSCAFG00000030297	ENSCAFT00000045282	411							0/0	99	0/0	99	0/0	99	0/1	99
9	5180948	C	T	1656.15	T	GRB2	3_prime_UTR_variant	ENSCAFG00000030297	ENSCAFT00000045282	1928							0/0	99	0/0	99	0/0	99	0/1	99
9	5181831	C	T	349.15	T	GRB2	3_prime_UTR_variant	ENSCAFG00000030297	ENSCAFT00000045282	2811							0/0	36	0/0	99	0/0	42	0/1	99
9	5461074	T	TA	271.11	A	ICT1	upstream_gene_variant	ENSCAFG00000004699	ENSCAFT00000048829						3901		0/0	28	0/0	99	0/0	88	0/1	99
9	5461074				A	CDR2L	3_prime_UTR_variant	ENSCAFG00000030285	ENSCAFT00000044492	2203-2204
9	5461344	C	G	933.15	G	ICT1	upstream_gene_variant	ENSCAFG00000004699	ENSCAFT00000048829						4171		0/0	99	0/0	99	0/0	99	0/1	99
9	5461344				G	CDR2L	3_prime_UTR_variant	ENSCAFG00000030285	ENSCAFT00000044492	1934
9	5575931	C	T	1096.15	T	FDXR	synonymous_variant	ENSCAFG00000004638	ENSCAFT00000007472	1224	1104	368	I	atC/atT			0/0	87	0/0	99	0/0	96	0/1	99
9	6908358	C	T	3372.15	T	CDC42EP4	synonymous_variant	ENSCAFG00000004510	ENSCAFT00000007272	1053	1053	351	R	cgC/cgT			0/0	99	0/0	99	0/1	99	0/0	99
9	7418687	C	A	2507.15	A	SLC39A11	3_prime_UTR_variant	ENSCAFG00000031583	ENSCAFT00000043698	2238							0/1	99	0/0	99	0/0	99	0/0	99
9	7418830	C	T	2398.15	T	SLC39A11	3_prime_UTR_variant	ENSCAFG00000031583	ENSCAFT00000043698	2095							0/1	99	0/0	99	0/0	99	0/0	99
9	9207165	G	A	872.74	A	GPIIIA	missense_variant	ENSCAFG00000013735	ENSCAFT00000021789	423	337	113	R/W	Cgg/Tgg		deleterious(0.01)	0/0	63	0/0	99	0/0	99	1/1	72
9	9207165				A	GPIIIA	missense_variant	ENSCAFG00000013735	ENSCAFT00000037064	346	346	116	R/W	Cgg/Tgg		deleterious(0.01)
9	9429851	T	G	148.15	G	KANSL1	missense_variant	ENSCAFG00000013708	ENSCAFT00000021750	1059	187	63	F/V	Ttc/Gtc		deleterious(0.02)	0/1	99	0/0	99	0/0	99	0/0	99
9	9429851				G	KANSL1	missense_variant	ENSCAFG00000013708	ENSCAFT00000021746	187	187	63	F/V	Ttc/Gtc		deleterious(0.02)
9	10217714	G	C	227.15	C		3_prime_UTR_variant	ENSCAFG00000013419	ENSCAFT00000021291	1371							0/1	99	0/0	99	0/0	99	0/0	99
9	10282847	C	T	12522	T	5S_rRNA	upstream_gene_variant	ENSCAFG00000030947	ENSCAFT00000042615						4527		0/1	99	1/1	99	0/0	88	1/1	99
9	10282847				T		synonymous_variant	ENSCAFG00000015156	ENSCAFT00000024052	309	309	103	D	gaC/gaT
9	10288425	A	G	464.88	G	5S_rRNA	downstream_gene_variant	ENSCAFG00000030947	ENSCAFT00000042615						923		0/1	99	0/0	36	0/0	96	./.	3
9	10288425				G		synonymous_variant	ENSCAFG00000029478	ENSCAFT00000045275	474	474	158	Q	caA/caG
9	10288625	G	C	321.76	C	5S_rRNA	downstream_gene_variant	ENSCAFG00000030947	ENSCAFT00000042615						1123		0/1	40	0/0	36	0/0	18	./.	6
9	10288625				C		missense_variant	ENSCAFG00000029478	ENSCAFT00000045275	674	674	225	R/T	aGg/aCg		tolerated(0.33)
9	10288626	G	A	302.98	A	5S_rRNA	downstream_gene_variant	ENSCAFG00000030947	ENSCAFT00000042615						1124		0/1	42	0/0	36	0/0	15	./.	6
9	10288626				A		synonymous_variant	ENSCAFG00000029478	ENSCAFT00000045275	675	675	225	R	agG/agA
9	10288789	G	A	412.08	A	5S_rRNA	downstream_gene_variant	ENSCAFG00000030947	ENSCAFT00000042615						1287		0/1	32	0/0	21	0/0	57	./.	.
9	10288789				A		missense_variant	ENSCAFG00000029478	ENSCAFT00000045275	838	838	280	E/K	Gag/Aag		tolerated(0.33)
9	10289092	A	G	400.01	G	5S_rRNA	downstream_gene_variant	ENSCAFG00000030947	ENSCAFT00000042615						1590		0/1	99	0/0	18	0/0	30	./.	.
9	10289092				G		missense_variant	ENSCAFG00000029478	ENSCAFT00000045275	1141	1141	381	T/A	Acc/Gcc		tolerated(0.96)
9	10289505	T	C	194.91	C	5S_rRNA	downstream_gene_variant	ENSCAFG00000030947	ENSCAFT00000042615						2003		0/1	84	0/0	33	0/0	63	./.	.
9	10289505				C		synonymous_variant	ENSCAFG00000029478	ENSCAFT00000045275	1554	1554	518	P	ccT/ccC
9	10289560	C	G	782.14	G	5S_rRNA	downstream_gene_variant	ENSCAFG00000030947	ENSCAFT00000042615						2058		0/0	66	1/1	30	0/1	99	./.	3
9	10289560				G		missense_variant	ENSCAFG00000029478	ENSCAFT00000045275	1609	1609	537	P/A	Cct/Gct		tolerated(0.72)
9	10289609	A	G	716.83	G	5S_rRNA	downstream_gene_variant	ENSCAFG00000030947	ENSCAFT00000042615						2107		0/1	18	0/0	30	0/0	51	./.	3
9	10289609				G		missense_variant	ENSCAFG00000029478	ENSCAFT00000045275	1658	1658	553	E/G	gAg/gGg		tolerated(0.4)
9	10289978	C	T	246.82	T	5S_rRNA	downstream_gene_variant	ENSCAFG00000030947	ENSCAFT00000042615						2476		0/1	99	0/0	51	0/0	42	./.	.
9	10289978				T		missense_variant	ENSCAFG00000029478	ENSCAFT00000045275	2027	2027	676	T/I	aCc/aTc		tolerated(0.4)
9	10290325	C	T	138.86	T	5S_rRNA	downstream_gene_variant	ENSCAFG00000030947	ENSCAFT00000042615						2823		0/0	42	./.	6	0/1	95	./.	.
9	10290325				T		missense_variant	ENSCAFG00000029478	ENSCAFT00000045275	2374	2374	792	H/Y	Cat/Tat		tolerated(0.09)
9	11466204	G	C	676.15	C	CYB561	missense_variant	ENSCAFG00000013017	ENSCAFT00000020662	107	95	32	T/S	aCc/aGc		tolerated(0.17)	0/0	99	0/0	99	0/1	99	0/0	99
9	11502465	T	A	101.16	A		missense_variant	ENSCAFG00000012998	ENSCAFT00000020636	1330	1330	444	Y/N	Tac/Aac		tolerated(0.3)	0/1	86	0/0	24	0/0	51	0/0	48
9	11775131	T	C	701.15	C	FTSJ3	missense_variant	ENSCAFG00000012770	ENSCAFT00000020267	2398	2398	800	K/E	Aaa/Gaa		deleterious(0.01)	0/0	99	0/0	99	0/0	99	0/1	99
9	11775131				C	DDX42	downstream_gene_variant	ENSCAFG00000012818	ENSCAFT00000020366						1506
9	12631195	G	T	1046.15	T	BPTF	missense_variant	ENSCAFG00000011552	ENSCAFT00000047847	5704	5704	1902	Q/K	Caa/Aaa		deleterious(0.03)	0/0	99	0/0	99	0/0	99	0/1	99
9	12631195				T	BPTF	missense_variant	ENSCAFG00000011552	ENSCAFT00000018361	5326	5326	1776	Q/K	Caa/Aaa		deleterious(0.03)
9	14561238	T	G	9627.52	G	AXIN2	missense_variant	ENSCAFG00000011236	ENSCAFT00000017890	488	372	124	D/E	gaT/gaG		tolerated(0.44)	1/1	99	0/1	99	0/0	99	0/0	99
9	14588192	G	A	768.15	A	AXIN2	3_prime_UTR_variant	ENSCAFG00000011236	ENSCAFT00000017890	3310							0/0	99	0/0	99	0/0	99	0/1	99
9	15049193	T	C	33.89	C	ARSG	missense_variant	ENSCAFG00000011070	ENSCAFT00000017623	900	56	19	L/P	cTt/cCt		deleterious(0.01)	./.	.	0/0	30	./.	3	0/1	65
9	18189859	G	T	1013.95	T		missense_variant	ENSCAFG00000013770	ENSCAFT00000048682	354	352	118	A/S	Gcc/Tcc		deleterious(0.01)	1/1	21	1/1	39	1/1	24	./.	.
9	18189859				T		missense_variant	ENSCAFG00000013770	ENSCAFT00000021851	289	289	97	A/S	Gcc/Tcc		deleterious(0.01)
9	19621537	G	A	127.15	A	MEOX1	synonymous_variant	ENSCAFG00000014476	ENSCAFT00000048933	1108	438	146	K	aaG/aaA			0/0	63	0/0	99	0/1	99	0/0	51
9	19621537				A	MEOX1	synonymous_variant	ENSCAFG00000014476	ENSCAFT00000022993	438	438	146	K	aaG/aaA
9	20408603	C	T	3719.15	T	NAGLU	synonymous_variant	ENSCAFG00000014972	ENSCAFT00000023748	2143	1167	389	Q	caG/caA			0/0	99	0/0	99	0/1	99	0/0	99
9	20408603				T	HSD17B1	upstream_gene_variant	ENSCAFG00000014961	ENSCAFT00000023737						1811
9	20614422	C	T	637.15	T	STAT5A	downstream_gene_variant	ENSCAFG00000015346	ENSCAFT00000024404						2030		0/1	99	0/0	99	0/0	99	0/0	99
9	20614422				T	STAT3	3_prime_UTR_variant	ENSCAFG00000015213	ENSCAFT00000024171	4498
9	20616487	A	T	857.16	T	STAT5A	3_prime_UTR_variant	ENSCAFG00000015346	ENSCAFT00000024404	3209							0/0	99	0/0	99	0/1	99	0/0	48
9	20616487				T	STAT3	downstream_gene_variant	ENSCAFG00000015213	ENSCAFT00000024171						1767
9	20871774	C	T	694.15	T	DNAJC7	missense_variant	ENSCAFG00000015749	ENSCAFT00000024959	349	349	117	R/C	Cgt/Tgt		tolerated(0.07)	0/0	99	0/0	99	0/1	99	0/0	99
9	20871774				T	DNAJC7	upstream_gene_variant	ENSCAFG00000015749	ENSCAFT00000048870						2172
9	21002129	C	T	3855.15	T	NT5C3B	downstream_gene_variant	ENSCAFG00000015865	ENSCAFT00000025141						1845		0/0	99	0/0	99	0/1	99	0/0	99
9	21002129				T	FKBP10	missense_variant	ENSCAFG00000015885	ENSCAFT00000025178	1690	1690	564	V/M	Gtg/Atg		tolerated(0.1)
9	21017746	G	T	3881.74	T	LEPREL4	3_prime_UTR_variant	ENSCAFG00000015902	ENSCAFT00000025201	1564							0/0	99	0/0	99	0/0	99	1/1	99
9	21250003	T	A	486.91	A	KRT19	downstream_gene_variant	ENSCAFG00000023647	ENSCAFT00000025270						4964		0/1	99	./.	.	0/0	54	./.	.
9	21250003				A	KRT15	synonymous_variant	ENSCAFG00000023529	ENSCAFT00000045014	117	117	39	G	ggT/ggA
9	21250003				A	KRT15	synonymous_variant	ENSCAFG00000023529	ENSCAFT00000025250	117	117	39	G	ggT/ggA
9	21868421	C	T	460.15	T	KRT10	3_prime_UTR_variant	ENSCAFG00000016007	ENSCAFT00000025391	1907							0/0	99	0/0	99	0/1	99	0/0	99
9	22473583	C	G	86.15	G	NR1D1	downstream_gene_variant	ENSCAFG00000016150	ENSCAFT00000025626						4627		0/1	99	0/0	99	0/0	99	0/0	99
9	22473583				G	WIPF2	intron_variant	ENSCAFG00000016125	ENSCAFT00000025595
9	22473583				G	THRA	missense_variant	ENSCAFG00000016173	ENSCAFT00000025690	1489	901	301	E/Q	Gaa/Caa		tolerated(0.23)
9	22775767	C	G	213.15	G	ERBB2	missense_variant	ENSCAFG00000016351	ENSCAFT00000025936	1174	751	251	D/H	Gac/Cac		tolerated(0.05)	0/1	99	0/0	99	0/0	99	0/0	99
9	22817327	G	A	486.69	A	STARD3	missense_variant	ENSCAFG00000016383	ENSCAFT00000025973	1370	1004	335	S/L	tCg/tTg		tolerated(0.05)	0/1	76	./.	12	0/0	21	./.	.
9	22817327				A	TCAP	upstream_gene_variant	ENSCAFG00000016374	ENSCAFT00000025961						4347
9	23467989	C	T	1630.74	T	PIP4K2B	synonymous_variant	ENSCAFG00000016574	ENSCAFT00000026259	934	934	312	L	Ctg/Ttg			0/0	99	0/0	99	0/0	99	1/1	99
9	23471192	C	T	2360.74	T	PIP4K2B	3_prime_UTR_variant	ENSCAFG00000016574	ENSCAFT00000026259	3184							0/0	99	0/0	99	0/0	99	1/1	99
9	23471192				T	PSMB3	downstream_gene_variant	ENSCAFG00000016587	ENSCAFT00000026270						3284
9	23500738	C	T	77.2	T	PCGF2	downstream_gene_variant	ENSCAFG00000016546	ENSCAFT00000026210						1189		0/0	15	0/0	36	0/1	99	0/0	33
9	23500738				T	CISD3	downstream_gene_variant	ENSCAFG00000030243	ENSCAFT00000048164						653
9	23500738				T	PCGF2	3_prime_UTR_variant	ENSCAFG00000016546	ENSCAFT00000048828	2264
9	23665105	C	T	978.79	T	SRCIN1	downstream_gene_variant	ENSCAFG00000016614	ENSCAFT00000026327						577		0/0	15	0/0	63	0/1	99	1/1	33
9	23665105				T	SRCIN1	3_prime_UTR_variant	ENSCAFG00000016614	ENSCAFT00000047784	4311
9	23718632	A	C	5317.15	C	ARHGAP23	missense_variant	ENSCAFG00000016627	ENSCAFT00000026340	1245	1245	415	I/M	atT/atG		tolerated(0.11)	0/0	99	0/0	99	0/1	99	0/0	87
9	23718632				C	ARHGAP23	missense_variant	ENSCAFG00000016627	ENSCAFT00000045837	1399	1263	421	I/M	atT/atG		tolerated(0.11)
9	23718632				C	ARHGAP23	missense_variant	ENSCAFG00000016627	ENSCAFT00000045929	1215	1215	405	I/M	atT/atG		tolerated(0.11)
9	24354826	C	T	8426.74	T	NFE2L1	synonymous_variant	ENSCAFG00000023139	ENSCAFT00000035396	2037	1533	511	S	tcC/tcT			0/0	99	0/0	99	0/0	99	1/1	99
9	24355417	G	A	8810.74	A	NFE2L1	synonymous_variant	ENSCAFG00000023139	ENSCAFT00000035396	2628	2124	708	E	gaG/gaA			0/0	99	0/0	99	0/0	99	1/1	99
9	24859292	C	G	161.34	G	HOXB6	missense_variant	ENSCAFG00000016854	ENSCAFT00000026682	437	437	146	G/A	gGc/gCc		tolerated(0.16)	0/1	99	0/0	84	0/0	99	./.	9
9	24859292				G	HOXB5	upstream_gene_variant	ENSCAFG00000016852	ENSCAFT00000026675						2920
9	26094454	A	G	1143.15	G	ITGA3	3_prime_UTR_variant	ENSCAFG00000016987	ENSCAFT00000026903	3377							0/0	99	0/1	99	0/0	99	0/0	99
9	26094454				G	SAMD14	downstream_gene_variant	ENSCAFG00000029881	ENSCAFT00000042829						1999
9	26404143	A	G	232.41	G	CHAD	upstream_gene_variant	ENSCAFG00000017064	ENSCAFT00000027021						1938		0/0	15	./.	12	1/1	21	./.	.
9	26404143				G	ACSF2	synonymous_variant	ENSCAFG00000017050	ENSCAFT00000027010	1543	1302	434	T	acA/acG
9	26463336	G	A	2617.74	A	MYCBPAP	upstream_gene_variant	ENSCAFG00000017090	ENSCAFT00000027073						4872		0/0	99	1/1	99	0/0	99	0/0	99
9	26463336				A	EPN3	missense_variant	ENSCAFG00000017080	ENSCAFT00000027046	2239	1610	537	G/E	gGg/gAg		tolerated(0.26)
9	26463336				A	MYCBPAP	intron_variant	ENSCAFG00000017090	ENSCAFT00000027070
9	31704376	G	A	2100.15	A	TRIM25	3_prime_UTR_variant	ENSCAFG00000017390	ENSCAFT00000027553	4674							0/0	99	0/0	99	0/0	99	0/1	99
9	31907078	A	T	54.25	T	AKAP1	downstream_gene_variant	ENSCAFG00000017409	ENSCAFT00000027593						2785		./.	12	0/1	87	0/0	45	0/0	60
9	31907078				T	AKAP1	3_prime_UTR_variant	ENSCAFG00000017409	ENSCAFT00000047897	5458
9	33691899	T	C	160.37	C	TRIM37	upstream_gene_variant	ENSCAFG00000017569	ENSCAFT00000027862						4534		0/0	22	0/1	70	0/1	14	0/1	99
9	33691899				C	SKA2	3_prime_UTR_variant	ENSCAFG00000029233	ENSCAFT00000042908	1582
9	33691899				C	TRIM37	upstream_gene_variant	ENSCAFG00000017569	ENSCAFT00000027859						4534
9	34641820	A	G	284.18	G	MED13	5_prime_UTR_variant	ENSCAFG00000017703	ENSCAFT00000028083	497							0/1	44	0/0	99	0/0	99	0/0	66
9	36383578	G	A	1296.15	A	MYO19	downstream_gene_variant	ENSCAFG00000017832	ENSCAFT00000028288						400		0/0	99	0/0	99	0/0	99	0/1	99
9	36383578				A	ZNHIT3	missense_variant	ENSCAFG00000017830	ENSCAFT00000028282	460	460	154	E/K	Gag/Aag		tolerated(0.24)
9	36383578				A	MYO19	downstream_gene_variant	ENSCAFG00000017832	ENSCAFT00000048238						822
9	36414765	C	T	700.2	T	MYO19	missense_variant	ENSCAFG00000017832	ENSCAFT00000028288	94	94	32	A/T	Gcc/Acc		tolerated(0.57)	0/0	99	0/0	99	0/0	99	0/1	99
9	36414765				T	MYO19	missense_variant	ENSCAFG00000017832	ENSCAFT00000048238	358	94	32	A/T	Gcc/Acc		tolerated(0.57)
9	37191266	G	C	237.15	C	TADA2A	5_prime_UTR_variant	ENSCAFG00000018140	ENSCAFT00000028817	17							0/0	87	0/0	99	0/1	99	0/0	99
9	37241168	C	T	1539.52	T	TADA2A	3_prime_UTR_variant	ENSCAFG00000018140	ENSCAFT00000028817	1682							0/0	99	0/0	99	1/1	69	0/1	99
9	40732797	C	T	460.15	T	RHOT1	synonymous_variant	ENSCAFG00000018443	ENSCAFT00000029309	1476	1476	492	V	gtG/gtA			0/0	60	0/0	78	0/0	54	0/1	99
9	40732797				T	RHOT1	synonymous_variant	ENSCAFG00000018443	ENSCAFT00000043009	1800	1515	505	V	gtG/gtA
9	40817324	G	A	172.15	A	ADAP2	3_prime_UTR_variant	ENSCAFG00000018466	ENSCAFT00000035392	3549							0/0	72	0/0	99	0/0	78	0/1	99
9	40870432	T	G	50.35	G	TEFM	3_prime_UTR_variant	ENSCAFG00000018475	ENSCAFT00000047467	3953							0/0	33	0/0	96	0/0	54	0/1	83
9	40870432				G	ATAD5	downstream_gene_variant	ENSCAFG00000018481	ENSCAFT00000043833						495
9	40870432				G	ATAD5	downstream_gene_variant	ENSCAFG00000018481	ENSCAFT00000029357						492
9	40870432				G	TEFM	downstream_gene_variant	ENSCAFG00000018475	ENSCAFT00000029345						2613
9	40871121	C	T	102.47	T	TEFM	3_prime_UTR_variant	ENSCAFG00000018475	ENSCAFT00000047467	4642							0/1	29	0/0	33	./.	6	0/1	27
9	40871121				T	ATAD5	missense_variant	ENSCAFG00000018481	ENSCAFT00000043833	5417	5417	1806	G/E	gGa/gAa		tolerated(0.28)
9	40871121				T	ATAD5	missense_variant	ENSCAFG00000018481	ENSCAFT00000029357	5558	5558	1853	G/E	gGa/gAa		tolerated(0.31)
9	40871121				T	TEFM	downstream_gene_variant	ENSCAFG00000018475	ENSCAFT00000029345						3302
9	40976802	G	C	108.15	C	CRLF3	3_prime_UTR_variant	ENSCAFG00000018492	ENSCAFT00000029361	1995							0/1	99	0/0	99	0/0	99	0/0	93
9	41503108	G	A	211.15	A	NF1	synonymous_variant	ENSCAFG00000018592	ENSCAFT00000029545	6825	6825	2275	A	gcC/gcT			0/0	60	0/0	99	0/0	84	0/1	99
9	41503108				A	NF1	synonymous_variant	ENSCAFG00000018592	ENSCAFT00000046191	6888	6747	2249	A	gcC/gcT
9	41870360	C	T	13004	T	WSB1	5_prime_UTR_variant	ENSCAFG00000018629	ENSCAFT00000029577	857							0/1	99	1/1	99	1/1	99	0/0	99
9	41878159	C	T	2310.15	T	WSB1	missense_variant	ENSCAFG00000018629	ENSCAFT00000029577	1314	373	125	R/C	Cgc/Tgc		deleterious(0.03)	0/0	99	0/0	99	0/1	99	0/0	99
9	42945875	G	C	2926.74	C	FAM222B	synonymous_variant	ENSCAFG00000031142	ENSCAFT00000047903	1056	501	167	A	gcC/gcG			0/0	99	0/0	99	1/1	99	0/0	99
9	42945875				C	TLCD1	intron_variant	ENSCAFG00000029722	ENSCAFT00000043143
9	43404347	T	C	3612.15	C	NUFIP2	synonymous_variant	ENSCAFG00000018888	ENSCAFT00000029978	2355	1827	609	A	gcA/gcG			0/0	99	0/1	99	0/0	99	0/0	99
9	43405368	G	A	697.15	A	NUFIP2	missense_variant	ENSCAFG00000018888	ENSCAFT00000029978	1334	806	269	P/L	cCt/cTt		tolerated(0.24)	0/1	99	0/0	99	0/0	99	0/0	99
9	43411241	A	G	1149.15	G	NUFIP2	missense_variant	ENSCAFG00000018888	ENSCAFT00000029978	788	260	87	L/P	cTc/cCc		deleterious(0.05)	0/0	99	0/0	99	0/0	99	0/1	99
9	45419048	G	C	440.15	C	RPH3AL	missense_variant	ENSCAFG00000019132	ENSCAFT00000044656	1507	836	279	W/S	tGg/tCg		tolerated(0.51)	0/0	69	0/0	69	0/0	42	0/1	99
9	45419048				C	RPH3AL	missense_variant	ENSCAFG00000019132	ENSCAFT00000030385	850	850	284	G/R	Ggc/Cgc		tolerated(0.28)
9	45515785	T	G	972.15	G	YWHAE	3_prime_UTR_variant	ENSCAFG00000032226	ENSCAFT00000044584	2008							0/1	99	0/0	99	0/0	99	0/0	99
9	45636045	G	A	2189.15	A	MYO1C	downstream_gene_variant	ENSCAFG00000019169	ENSCAFT00000030441						442		0/0	99	0/0	99	0/0	99	0/1	99
9	45636045				A	MYO1C	3_prime_UTR_variant	ENSCAFG00000019169	ENSCAFT00000047641	3559
9	45636152	T	A	2097.15	A	MYO1C	downstream_gene_variant	ENSCAFG00000019169	ENSCAFT00000030441						335		0/0	99	0/0	99	0/0	99	0/1	99
9	45636152				A	MYO1C	3_prime_UTR_variant	ENSCAFG00000019169	ENSCAFT00000047641	3452
9	45745948	G	A	45.15	A	SLC43A2	synonymous_variant	ENSCAFG00000019194	ENSCAFT00000030472	742	627	209	I	atC/atT			0/1	78	0/0	57	0/0	99	0/0	60
9	45798373	G	A	141.18	A	U6	downstream_gene_variant	ENSCAFG00000030924	ENSCAFT00000046982						2215		0/0	42	0/0	45	0/0	18	0/1	99
9	45798373				A	PRPF8	synonymous_variant	ENSCAFG00000019221	ENSCAFT00000030519	7002	6843	2281	Y	taC/taT
9	45798373				A	RILP	upstream_gene_variant	ENSCAFG00000019203	ENSCAFT00000030483						1496
9	46393598	C	T	326.15	T	SMG6	intron_variant	ENSCAFG00000019260	ENSCAFT00000030579								0/0	99	0/0	99	0/0	96	0/1	99
9	46393598				T	LSM5	synonymous_variant	ENSCAFG00000019261	ENSCAFT00000030580	220	220	74	L	Cta/Tta
9	47446474	G	A	353.15	A	SHPK	synonymous_variant	ENSCAFG00000019344	ENSCAFT00000030738	1317	1317	439	S	tcC/tcT			0/1	99	0/0	99	0/0	99	0/0	99
9	47446474				A	SHPK	synonymous_variant	ENSCAFG00000019344	ENSCAFT00000042813	1452	1452	484	S	tcC/tcT
9	48180057	C	A	1149.15	A	ARRDC1	missense_variant	ENSCAFG00000019394	ENSCAFT00000030832	769	694	232	A/S	Gcc/Tcc		tolerated(0.07)	0/1	99	0/0	99	0/0	99	0/0	99
9	48345772	G	A	726.57	A	EXD3	missense_variant	ENSCAFG00000019444	ENSCAFT00000030921	106	106	36	D/N	Gat/Aat		tolerated(0.3)	0/1	99	1/1	39	0/0	24	0/0	21
9	48433056	C	T	842.15	T	SLC34A3	downstream_gene_variant	ENSCAFG00000019464	ENSCAFT00000030951						4951		0/1	99	0/0	99	0/0	99	0/0	99
9	48433056				T	FAM166A	downstream_gene_variant	ENSCAFG00000019458	ENSCAFT00000030939						933
9	48433056				T	TUBB4B	missense_variant	ENSCAFG00000019460	ENSCAFT00000030948	553	553	185	A/T	Gcc/Acc		tolerated(0.1)
9	48433056				T	RNF208	intron_variant	ENSCAFG00000019467	ENSCAFT00000030955
9	49062122	C	T	1481.74	T	INPP5E	synonymous_variant	ENSCAFG00000019664	ENSCAFT00000031269	538	84	28	P	ccC/ccT			0/0	99	0/0	99	1/1	99	0/0	90
9	49062122				T	GPSM1	intron_variant	ENSCAFG00000019694	ENSCAFT00000031316
9	49062122				T	SEC16A	downstream_gene_variant	ENSCAFG00000019656	ENSCAFT00000031259						2780
9	49062122				T	SEC16A	intron_variant	ENSCAFG00000019656	ENSCAFT00000031263
9	49062122				T	SEC16A	downstream_gene_variant	ENSCAFG00000019656	ENSCAFT00000043695						2805
9	49391072	C	T	557.15	T	NACC2	3_prime_UTR_variant	ENSCAFG00000030397	ENSCAFT00000043972	4024							0/0	99	0/0	99	0/0	99	0/1	99
9	49792627	G	A	277.15	A	SURF1	upstream_gene_variant	ENSCAFG00000023616	ENSCAFT00000036432						2479		0/0	99	0/0	99	0/0	54	0/1	99
9	49792627				A	SURF4	downstream_gene_variant	ENSCAFG00000019762	ENSCAFT00000031420						3447
9	49792627				A	SURF2	synonymous_variant	ENSCAFG00000019763	ENSCAFT00000031422	369	369	123	V	gtG/gtA
9	49792627				A	SURF1	upstream_gene_variant	ENSCAFG00000023616	ENSCAFT00000036430						2479
9	49876088	G	T	762.15	T	SLC2A6	downstream_gene_variant	ENSCAFG00000019780	ENSCAFT00000031452						3222		0/0	99	0/1	99	0/0	99	0/0	99
9	49876088				T	CACFD1	synonymous_variant	ENSCAFG00000019779	ENSCAFT00000031450	375	375	125	T	acG/acT
9	50089650	G	A	814.32	A	SARDH	synonymous_variant	ENSCAFG00000019794	ENSCAFT00000031482	794	345	115	S	agC/agT			./.	3	0/0	30	1/1	72	./.	3
9	50370544	C	T	87.17	T	WDR5	3_prime_UTR_variant	ENSCAFG00000019830	ENSCAFT00000031546	2059							./.	3	0/1	30	0/0	18	0/0	27
9	50572385	C	T	3618.15	T	RXRALPHA	3_prime_UTR_variant	ENSCAFG00000019838	ENSCAFT00000031555	1727							0/0	99	0/0	99	0/0	99	0/1	99
9	50572814	G	A	5766.76	A	RXRALPHA	3_prime_UTR_variant	ENSCAFG00000019838	ENSCAFT00000031555	2156							0/0	99	0/1	99	0/0	99	0/1	99
9	50840733	C	T	4038.74	T	COL5A1	synonymous_variant	ENSCAFG00000019848	ENSCAFT00000044143	3896	3642	1214	P	ccC/ccT			0/0	99	0/0	99	1/1	99	0/0	99
9	50840733				T	COL5A1	synonymous_variant	ENSCAFG00000019848	ENSCAFT00000031582	4915	4869	1623	P	ccC/ccT
9	50854860	G	T	710.15	T	COL5A1	3_prime_UTR_variant	ENSCAFG00000019848	ENSCAFT00000044143	5149							0/1	99	0/0	99	0/0	99	0/0	99
9	50854860				T	COL5A1	downstream_gene_variant	ENSCAFG00000019848	ENSCAFT00000031582						677
9	51283718	G	T	2688.15	T	GBGT1	3_prime_UTR_variant	ENSCAFG00000019864	ENSCAFT00000031606	1857							0/0	99	0/0	99	0/0	99	0/1	99
9	51283825	G	A	2531.15	A	GBGT1	3_prime_UTR_variant	ENSCAFG00000019864	ENSCAFT00000031606	1964							0/0	99	0/0	99	0/0	99	0/1	99
9	52845202	C	G	58.15	G	NUP214	missense_variant	ENSCAFG00000019920	ENSCAFT00000031698	6151	5920	1974	G/R	Ggc/Cgc		deleterious(0)	0/1	91	0/0	99	0/0	99	0/0	99
9	52924761	C	G	157.28	G	NUP214	missense_variant	ENSCAFG00000019920	ENSCAFT00000031698	2128	1897	633	V/L	Gtc/Ctc		tolerated(0.73)	./.	12	0/1	99	0/0	36	0/0	33
9	52930001	C	T	266.15	T	NUP214	missense_variant	ENSCAFG00000019920	ENSCAFT00000031698	1487	1256	419	R/Q	cGg/cAg		tolerated(0.62)	0/0	60	0/0	99	0/0	84	0/1	99
9	54023502	A	G	46.44	G	TOR1A	intron_variant	ENSCAFG00000019980	ENSCAFT00000031796								0/0	33	0/1	57	0/0	66	0/1	26
9	54023502				G		synonymous_variant	ENSCAFG00000032504	ENSCAFT00000049721	1500	1500	500	N	aaT/aaC
9	54023585	C	T	555.25	T	TOR1A	intron_variant	ENSCAFG00000019980	ENSCAFT00000031796								0/0	99	0/1	99	0/0	99	0/0	99
9	54023585				T		missense_variant	ENSCAFG00000032504	ENSCAFT00000049721	1417	1417	473	E/K	Gag/Aag		tolerated(0.07)
9	54023628	C	T	3491.34	T	TOR1A	intron_variant	ENSCAFG00000019980	ENSCAFT00000031796								0/0	99	0/0	99	0/1	99	0/0	99
9	54023628				T		synonymous_variant	ENSCAFG00000032504	ENSCAFT00000049721	1374	1374	458	P	ccG/ccA
9	54023654	T	C	3748.34	C	TOR1A	intron_variant	ENSCAFG00000019980	ENSCAFT00000031796								0/0	99	0/0	99	0/1	99	0/0	99
9	54023654				C		missense_variant	ENSCAFG00000032504	ENSCAFT00000049721	1348	1348	450	M/V	Atg/Gtg		tolerated(0.51)
9	54023811	G	A	221.44	A	TOR1A	intron_variant	ENSCAFG00000019980	ENSCAFT00000031796								0/1	29	0/0	99	0/0	99	0/1	99
9	54023811				A		synonymous_variant	ENSCAFG00000032504	ENSCAFT00000049721	1191	1191	397	C	tgC/tgT
9	54023828	T	G	3953.88	G	TOR1A	intron_variant	ENSCAFG00000019980	ENSCAFT00000031796								0/0	99	0/0	99	0/1	99	0/0	99
9	54023828				G		missense_variant	ENSCAFG00000032504	ENSCAFT00000049721	1174	1174	392	K/Q	Aaa/Caa		deleterious(0.01)
9	54023940	A	G	582.26	G	TOR1A	intron_variant	ENSCAFG00000019980	ENSCAFT00000031796								0/0	56	0/1	99	0/0	99	0/0	49
9	54023940				G		synonymous_variant	ENSCAFG00000032504	ENSCAFT00000049721	1062	1062	354	H	caT/caC
9	54024747	T	A	121.38	A	TOR1A	intron_variant	ENSCAFG00000019980	ENSCAFT00000031796								./.	3	0/1	99	0/1	34	0/0	15
9	54024747				A		synonymous_variant	ENSCAFG00000032504	ENSCAFT00000049721	255	255	85	I	atA/atT
9	54094544	G	A	1924.58	A		intron_variant	ENSCAFG00000030536	ENSCAFT00000047169								0/0	15	./.	6	0/1	99	0/0	33
9	54094544				A	PRRX2	synonymous_variant	ENSCAFG00000019983	ENSCAFT00000031799	423	423	141	R	cgC/cgT
9	54094544				A	PRRX2	synonymous_variant	ENSCAFG00000019983	ENSCAFT00000045911	497	423	141	R	cgC/cgT
9	55060708	C	G	508.15	G	ODF2	downstream_gene_variant	ENSCAFG00000020054	ENSCAFT00000031912						449		0/1	99	0/0	81	0/0	96	0/0	75
9	55060708				G	GLE1	upstream_gene_variant	ENSCAFG00000020050	ENSCAFT00000043127						854
9	55060708				G	GLE1	upstream_gene_variant	ENSCAFG00000020050	ENSCAFT00000031904						1498
9	55060708				G	ODF2	3_prime_UTR_variant	ENSCAFG00000020054	ENSCAFT00000031916	3612
9	55060713	C	G	404.15	G	ODF2	downstream_gene_variant	ENSCAFG00000020054	ENSCAFT00000031912						444		0/1	99	0/0	81	0/0	93	0/0	81
9	55060713				G	GLE1	upstream_gene_variant	ENSCAFG00000020050	ENSCAFT00000043127						859
9	55060713				G	GLE1	upstream_gene_variant	ENSCAFG00000020050	ENSCAFT00000031904						1503
9	55060713				G	ODF2	3_prime_UTR_variant	ENSCAFG00000020054	ENSCAFT00000031916	3607
9	55061198	G	A	888.15	A	ODF2	synonymous_variant	ENSCAFG00000020054	ENSCAFT00000031912	2452	2452	818	L	Ctg/Ttg			0/1	99	0/0	99	0/0	99	0/0	99
9	55061198				A	GLE1	upstream_gene_variant	ENSCAFG00000020050	ENSCAFT00000043127						1344
9	55061198				A	GLE1	upstream_gene_variant	ENSCAFG00000020050	ENSCAFT00000031904						1988
9	55061198				A	ODF2	synonymous_variant	ENSCAFG00000020054	ENSCAFT00000031916	3122	2449	817	L	Ctg/Ttg
9	55348940	C	T	625.15	T	PTGES2	3_prime_UTR_variant	ENSCAFG00000020089	ENSCAFT00000031972	1225							0/0	99	0/1	99	0/0	99	0/0	99
9	55589707	C	T	154.08	T	ENG	downstream_gene_variant	ENSCAFG00000020106	ENSCAFT00000032002						643		0/0	21	0/0	21	1/1	15	0/0	27
9	55589707				T	ENG	downstream_gene_variant	ENSCAFG00000020106	ENSCAFT00000046384						643
9	55589707				T	FPGS	3_prime_UTR_variant	ENSCAFG00000020111	ENSCAFT00000032010	2596
9	55662170	C	T	176.22	T	TOR2A	downstream_gene_variant	ENSCAFG00000020120	ENSCAFT00000032021						472		0/0	24	0/0	45	0/0	24	0/1	18
9	55662170				T	TTC16	3_prime_UTR_variant	ENSCAFG00000031277	ENSCAFT00000045580	1901
9	55901772	C	G	436.15	G	ZNF79	missense_variant	ENSCAFG00000031097	ENSCAFT00000046277	1221	645	215	Q/H	caG/caC		deleterious(0)	0/1	99	0/0	99	0/0	90	0/0	81
9	55901772				G	SNORA65	downstream_gene_variant	ENSCAFG00000022333	ENSCAFT00000034440						3834
9	55901772				G	RPL12	downstream_gene_variant	ENSCAFG00000020136	ENSCAFT00000045165						2998
9	55901772				G	RPL12	downstream_gene_variant	ENSCAFG00000020136	ENSCAFT00000032052						3169
9	55922655	G	C	358.15	C	SLC2A8	missense_variant	ENSCAFG00000020140	ENSCAFT00000032066	1369	1229	410	A/G	gCc/gGc		deleterious(0.03)	0/1	99	0/0	99	0/0	99	0/0	99
9	57447187	G	T	3342.52	T	MAPKAP1	5_prime_UTR_variant	ENSCAFG00000020178	ENSCAFT00000032129	437							0/0	78	0/1	99	0/0	99	1/1	99
9	57855499	C	T	2427.15	T	HSPA5	downstream_gene_variant	ENSCAFG00000020196	ENSCAFT00000032170						242		0/0	99	0/1	99	0/0	99	0/0	99
9	57855499				T	RABEPK	3_prime_UTR_variant	ENSCAFG00000020201	ENSCAFT00000032171	3603
9	57881980	C	T	38.63	T	7SK	upstream_gene_variant	ENSCAFG00000020782	ENSCAFT00000032889						555		./.	3	0/1	35	0/1	31	./.	.
9	57881980				T		non_coding_exon_variant	ENSCAFG00000004922	ENSCAFT00000007916	72
9	57881980				T	RABEPK	upstream_gene_variant	ENSCAFG00000020201	ENSCAFT00000032171						4058
9	60209116	G	A	1800.74	A	PTGS1	synonymous_variant	ENSCAFG00000020263	ENSCAFT00000032287	463	463	155	L	Ctg/Ttg			0/0	99	0/0	99	0/0	99	1/1	99
9	60209116				A	PTGS1	intron_variant	ENSCAFG00000020263	ENSCAFT00000032279
10	419885	C	T	976.15	T	ERBB3	missense_variant	ENSCAFG00000000097	ENSCAFT00000000159	1474	1160	387	A/V	gCt/gTt		deleterious(0.04)	0/1	99	0/0	99	0/0	99	0/0	99
10	487567	T	A	812.15	A	SMARCC2	missense_variant	ENSCAFG00000000109	ENSCAFT00000000173	2254	1877	626	D/V	gAt/gTt		deleterious(0)	0/0	99	0/0	99	0/1	99	0/0	99
10	1152101	C	A	61.15	A	GPR182	intron_variant	ENSCAFG00000024578	ENSCAFT00000037911								0/1	94	0/0	99	0/0	99	0/0	99
10	1152101				A		non_coding_exon_variant	ENSCAFG00000000153	ENSCAFT00000000247	522
10	1199734	G	A	232.15	A	GPR182	intron_variant	ENSCAFG00000024578	ENSCAFT00000037911								0/0	99	0/0	99	0/1	99	0/0	99
10	1199734				A	TMEM194A	3_prime_UTR_variant	ENSCAFG00000000159	ENSCAFT00000000256	3833
10	9007753	A	G	1221.93	G		non_coding_exon_variant	ENSCAFG00000012238	ENSCAFT00000019438	308							1/1	54	./.	.	1/1	42	./.	.
10	9007753				G	GRIP1	intron_variant	ENSCAFG00000000384	ENSCAFT00000044628
10	9007753				G	GRIP1	intron_variant	ENSCAFG00000000384	ENSCAFT00000000607
10	9007871	G	A	660.94	A		non_coding_exon_variant	ENSCAFG00000012238	ENSCAFT00000019438	192							1/1	27	./.	.	1/1	27	./.	.
10	9007871				A	GRIP1	intron_variant	ENSCAFG00000000384	ENSCAFT00000044628
10	9007871				A	GRIP1	intron_variant	ENSCAFG00000000384	ENSCAFT00000000607
10	10815682	T	C	3113.15	C	RAP1B	3_prime_UTR_variant	ENSCAFG00000000415	ENSCAFT00000000651	785							0/0	99	0/0	99	0/0	99	0/1	99
10	10844603	C	A	288.15	A	NUP107	missense_variant	ENSCAFG00000000417	ENSCAFT00000000659	565	338	113	A/E	gCa/gAa		tolerated(0.12)	0/1	99	0/0	99	0/0	99	0/0	99
10	12340867	A	G	594.35	G	PTPRB	synonymous_variant	ENSCAFG00000000446	ENSCAFT00000000719	1375	1104	368	N	aaT/aaC			./.	9	0/0	24	0/1	99	0/0	30
10	12340867				G	PTPRB	synonymous_variant	ENSCAFG00000000446	ENSCAFT00000000717	1104	1104	368	N	aaT/aaC
10	16631419	G	A	282.45	A		missense_variant	ENSCAFG00000029465	ENSCAFT00000044473	1133	1133	378	R/Q	cGg/cAg			./.	12	./.	9	0/1	99	0/0	24
10	16631419				A		missense_variant	ENSCAFG00000023004	ENSCAFT00000000865	1504	1504	502	R/C	Cgc/Tgc		deleterious(0)
10	16738595	C	T	1030.34	T	NCAPH2	intron_variant	ENSCAFG00000000603	ENSCAFT00000000932								0/0	99	0/0	99	0/1	99	./.	9
10	16738595				T	CPT1B	synonymous_variant	ENSCAFG00000000586	ENSCAFT00000000910	336	336	112	F	ttC/ttT
10	16738595				T		downstream_gene_variant	ENSCAFG00000000579	ENSCAFT00000000894						1981
10	16804020	C	T	3367.15	T	LMF2	synonymous_variant	ENSCAFG00000000572	ENSCAFT00000043739	612	612	204	A	gcC/gcT			0/0	99	0/0	99	0/0	99	0/1	99
10	16804020				T	NCAPH2	upstream_gene_variant	ENSCAFG00000000603	ENSCAFT00000000932						2295
10	16804020				T	LMF2	synonymous_variant	ENSCAFG00000000572	ENSCAFT00000000888	852	852	284	A	gcC/gcT
10	16804020				T		upstream_gene_variant	ENSCAFG00000031984	ENSCAFT00000048776						786
10	16845575	C	T	4225.76	T	PPP6R2	downstream_gene_variant	ENSCAFG00000000620	ENSCAFT00000000964						1393		0/1	99	0/1	99	0/0	99	0/0	99
10	16845575				T		3_prime_UTR_variant	ENSCAFG00000030366	ENSCAFT00000049380	855
10	16845575				T	PPP6R2	downstream_gene_variant	ENSCAFG00000000620	ENSCAFT00000047715						1626
10	16846403	C	T	500.15	T	PPP6R2	downstream_gene_variant	ENSCAFG00000000620	ENSCAFT00000000964						565		0/0	42	0/0	57	0/0	75	0/1	99
10	16846403				T		3_prime_UTR_variant	ENSCAFG00000030366	ENSCAFT00000049380	1683
10	16846403				T	PPP6R2	downstream_gene_variant	ENSCAFG00000000620	ENSCAFT00000047715						798
10	17001824	A	G	121.55	G	HDAC10	downstream_gene_variant	ENSCAFG00000000688	ENSCAFT00000001069						852		0/1	33	0/1	69	0/1	53	./.	5
10	17001824				G	HDAC10	3_prime_UTR_variant	ENSCAFG00000000688	ENSCAFT00000001070	3119
10	17001824				G	TUBGCP6	upstream_gene_variant	ENSCAFG00000000689	ENSCAFT00000001073						4946
10	17001845	T	C	52.23	C	HDAC10	downstream_gene_variant	ENSCAFG00000000688	ENSCAFT00000001069						873		0/1	30	0/1	59	./.	9	0/0	21
10	17001845				C	HDAC10	3_prime_UTR_variant	ENSCAFG00000000688	ENSCAFT00000001070	3140
10	17001845				C	TUBGCP6	upstream_gene_variant	ENSCAFG00000000689	ENSCAFT00000001073						4925
10	17043001	G	A	127.5	A		upstream_gene_variant	ENSCAFG00000000697	ENSCAFT00000001086						1259		./.	9	0/0	15	0/1	99	0/0	33
10	17043001				A	TRABD	3_prime_UTR_variant	ENSCAFG00000000698	ENSCAFT00000001087	2103
10	17296295	C	T	1923.15	T		upstream_gene_variant	ENSCAFG00000028945	ENSCAFT00000047148						1476		0/0	99	0/0	99	0/0	99	0/1	99
10	17296295				T	CRELD2	upstream_gene_variant	ENSCAFG00000000709	ENSCAFT00000001103						2887
10	17296295				T	ALG12	missense_variant	ENSCAFG00000000711	ENSCAFT00000001106	779	230	77	A/V	gCg/gTg		deleterious(0.01)
10	17296295				T	CRELD2	upstream_gene_variant	ENSCAFG00000000709	ENSCAFT00000046122						3338
10	19598897	G	A	4890.15	A	CERK	3_prime_UTR_variant	ENSCAFG00000000752	ENSCAFT00000046855	1552							0/0	99	0/0	99	0/1	99	0/0	99
10	19598897				A	CERK	downstream_gene_variant	ENSCAFG00000000752	ENSCAFT00000001158						83
10	19859476	C	T	231.35	T	GTSE1	downstream_gene_variant	ENSCAFG00000000782	ENSCAFT00000001218						2125		./.	9	0/0	30	0/0	33	0/1	99
10	19859476				T	TRMU	5_prime_UTR_variant	ENSCAFG00000000779	ENSCAFT00000001213	75
10	19863362	C	G	255.53	G	GTSE1	3_prime_UTR_variant	ENSCAFG00000000782	ENSCAFT00000001218	2732							0/1	99	0/0	99	0/0	99	0/0	99
10	19863362				G	TRMU	upstream_gene_variant	ENSCAFG00000000779	ENSCAFT00000001213						3812
10	20542294	C	G	2082.15	G	FBLN1	missense_variant	ENSCAFG00000000804	ENSCAFT00000001257	1171	1171	391	A/P	Gct/Cct		tolerated(0.17)	0/1	99	0/0	99	0/0	99	0/0	99
10	20816790	A	G	1114.15	G		upstream_gene_variant	ENSCAFG00000026767	ENSCAFT00000041050						2022		0/1	99	0/0	99	0/0	99	0/0	99
10	20816790				G	KIAA0930	missense_variant	ENSCAFG00000000850	ENSCAFT00000001331	1044	710	237	Y/C	tAc/tGc		deleterious(0.01)
10	20816790				G		upstream_gene_variant	ENSCAFG00000029128	ENSCAFT00000043885						3974
10	21118776	T	C	170.15	C	ARHGAP8	missense_variant	ENSCAFG00000030691	ENSCAFT00000001354	491	403	135	S/G	Agc/Ggc		tolerated(0.14)	0/1	99	0/0	99	0/0	99	0/0	99
10	22893477	C	T	601.18	T	SERHL2	synonymous_variant	ENSCAFG00000000970	ENSCAFT00000001503	1318	684	228	K	aaG/aaA			0/0	33	0/1	99	0/0	96	0/0	66
10	22893477				T	RRP7A	downstream_gene_variant	ENSCAFG00000000965	ENSCAFT00000001494						2671
10	23452364	C	A	1610.76	A	cfa-mir-33a	downstream_gene_variant	ENSCAFG00000020552	ENSCAFT00000032659						4249		0/1	99	0/1	99	0/0	99	0/0	99
10	23452364				A	SREBF2	3_prime_UTR_variant	ENSCAFG00000001013	ENSCAFT00000001559	3709
10	23452364				A		downstream_gene_variant	ENSCAFG00000031269	ENSCAFT00000048929						3418
10	23637614	G	A	164.06	A	XRCC6	downstream_gene_variant	ENSCAFG00000001043	ENSCAFT00000001601						855		0/0	21	1/1	15	0/0	33	0/0	48
10	23637614				A	XRCC6	3_prime_UTR_variant	ENSCAFG00000001043	ENSCAFT00000048401	3341
10	23740203	G	A	1637.76	A	POLR3H	missense_variant	ENSCAFG00000001053	ENSCAFT00000001618	794	526	176	E/K	Gag/Aag		tolerated(0.73)	0/1	99	0/1	99	0/0	78	0/0	99
10	23740203				A	ACO2	downstream_gene_variant	ENSCAFG00000001075	ENSCAFT00000001657						2472
10	23826948	C	T	2585.15	T	TOB2	missense_variant	ENSCAFG00000001092	ENSCAFT00000001664	521	521	174	A/V	gCc/gTc		tolerated(0.06)	0/1	99	0/0	99	0/0	99	0/0	99
10	24306329	T	C	838.15	C	XPNPEP3	3_prime_UTR_variant	ENSCAFG00000001134	ENSCAFT00000001733	2391							0/0	99	0/1	99	0/0	63	0/0	99
10	24753132	C	T	8533.74	T	MKL1	synonymous_variant	ENSCAFG00000001154	ENSCAFT00000001789	1928	1545	515	R	cgC/cgT			0/0	99	0/0	99	1/1	99	0/0	99
10	25568842	G	A	3645.15	A	MGAT3	synonymous_variant	ENSCAFG00000030441	ENSCAFT00000043684	960	960	320	Y	taC/taT			0/0	99	0/1	99	0/0	99	0/0	99
10	26125679	C	T	172.15	T	CBY1	synonymous_variant	ENSCAFG00000001384	ENSCAFT00000002133	357	357	119	L	ctG/ctA			0/0	69	0/0	48	0/0	84	0/1	99
10	26125679				T	CBY1	downstream_gene_variant	ENSCAFG00000001384	ENSCAFT00000043837						1103
10	26302076	GT	GTT,G	773.79	-	KDELR3	downstream_gene_variant	ENSCAFG00000001402	ENSCAFT00000002174						1935		0/0	14	0/1	28	0/1	99	0/2	99
10	26302076				-	DDX17	downstream_gene_variant	ENSCAFG00000001395	ENSCAFT00000002162						1490
10	26302076				-	DDX17	3_prime_UTR_variant	ENSCAFG00000001395	ENSCAFT00000037931	3486
10	26302076				TT	KDELR3	downstream_gene_variant	ENSCAFG00000001402	ENSCAFT00000002174						1935
10	26302076				TT	DDX17	downstream_gene_variant	ENSCAFG00000001395	ENSCAFT00000002162						1490
10	26302076				TT	DDX17	3_prime_UTR_variant	ENSCAFG00000001395	ENSCAFT00000037931	3486
10	26302077	T	G	2989.15	G	KDELR3	downstream_gene_variant	ENSCAFG00000001402	ENSCAFT00000002174						1935		0/0	99	0/0	99	0/0	99	0/1	99
10	26302077				G	DDX17	downstream_gene_variant	ENSCAFG00000001395	ENSCAFT00000002162						1490
10	26302077				G	DDX17	3_prime_UTR_variant	ENSCAFG00000001395	ENSCAFT00000037931	3486
10	26535583	C	T	62.18	T	PLA2G6	synonymous_variant	ENSCAFG00000001424	ENSCAFT00000002215	1571	945	315	C	tgC/tgT			0/0	33	0/0	42	0/1	64	0/0	18
10	26535583				T	PLA2G6	synonymous_variant	ENSCAFG00000001424	ENSCAFT00000002213	945	945	315	C	tgC/tgT
10	26595203	A	G	86.25	G	PICK1	3_prime_UTR_variant	ENSCAFG00000001431	ENSCAFT00000002227	1978							0/0	36	0/0	45	0/0	33	0/1	99
10	26595203				G	SLC16A8	downstream_gene_variant	ENSCAFG00000001429	ENSCAFT00000002225						1444
10	26612506	G	A	174.15	A	PICK1	synonymous_variant	ENSCAFG00000001431	ENSCAFT00000002227	156	99	33	I	atC/atT			0/1	99	0/0	57	0/0	45	0/0	33
10	26722381	T	C	1204.15	C	MICALL1	missense_variant	ENSCAFG00000001442	ENSCAFT00000047732	1926	1925	642	D/G	gAt/gGt		deleterious(0)	0/1	99	0/0	99	0/0	99	0/0	99
10	26722381				C	MICALL1	missense_variant	ENSCAFG00000001442	ENSCAFT00000002244	1926	1925	642	D/G	gAt/gGt		deleterious(0)
10	26823944	T	C	55.18	C	GCAT	missense_variant	ENSCAFG00000001456	ENSCAFT00000002278	508	397	133	S/G	Agc/Ggc		deleterious(0)	0/0	18	0/0	99	0/1	88	0/0	84
10	26919873	T	C	121.2	C	NOL12	3_prime_UTR_variant	ENSCAFG00000028770	ENSCAFT00000049367	3107							0/1	99	0/0	15	0/0	48	0/0	48
10	26919873				C	SNORA21	downstream_gene_variant	ENSCAFG00000021092	ENSCAFT00000033199						3795
10	26919908	C	T	187.59	T	NOL12	3_prime_UTR_variant	ENSCAFG00000028770	ENSCAFT00000049367	3072							0/1	99	./.	10	0/1	27	0/1	74
10	26919908				T	SNORA21	downstream_gene_variant	ENSCAFG00000021092	ENSCAFT00000033199						3760
10	26920115	A	G	808.76	G	NOL12	3_prime_UTR_variant	ENSCAFG00000028770	ENSCAFT00000049367	2865							0/1	99	0/1	99	0/0	51	0/0	99
10	26920115				G	SNORA21	downstream_gene_variant	ENSCAFG00000021092	ENSCAFT00000033199						3553
10	26946657	G	T	98.16	T	PDXP	3_prime_UTR_variant	ENSCAFG00000031949	ENSCAFT00000043767	1681							0/1	99	0/0	45	0/0	24	0/0	36
10	26973909	G	A	63.2	A	GGA1	missense_variant	ENSCAFG00000001496	ENSCAFT00000002334	1829	1756	586	P/S	Ccc/Tcc		tolerated(0.06)	0/0	57	0/0	60	0/1	96	0/0	42
10	26973940	C	T	216.19	T	GGA1	synonymous_variant	ENSCAFG00000001496	ENSCAFT00000002334	1798	1725	575	T	acG/acA			0/1	99	0/0	63	0/0	21	0/0	42
10	27468979	C	G	3079.15	G	TST	upstream_gene_variant	ENSCAFG00000001516	ENSCAFT00000002363						4797		0/0	96	0/0	99	0/0	99	0/1	99
10	27468979				G	MPST	synonymous_variant	ENSCAFG00000001514	ENSCAFT00000002361	546	546	182	V	gtG/gtC
10	28851920	G	A	326.15	A	HMGXB4	upstream_gene_variant	ENSCAFG00000001732	ENSCAFT00000046398						1198		0/0	42	0/0	99	0/0	78	0/1	99
10	28851920				A	HMGXB4	synonymous_variant	ENSCAFG00000001732	ENSCAFT00000002712	141	141	47	I	atC/atT
10	30948656	A	T	193.06	T	BPIFC	upstream_gene_variant	ENSCAFG00000001777	ENSCAFT00000002792						3257		0/0	15	0/0	15	0/0	69	0/1	99
10	30948656				T	FBXO7	missense_variant	ENSCAFG00000001758	ENSCAFT00000002753	109	109	37	S/T	Tcc/Acc		tolerated(0.5)
10	32274237	C	A	55.15	A	POLR3B	synonymous_variant	ENSCAFG00000001851	ENSCAFT00000002941	990	990	330	A	gcG/gcT			0/1	88	0/0	93	0/0	45	0/0	45
10	32319245	C	T	520.15	T	TCP11L2	3_prime_UTR_variant	ENSCAFG00000001873	ENSCAFT00000002966	1740							0/0	72	0/0	99	0/1	99	0/0	99
10	32397384	G	A	2953.15	A	CKAP4	3_prime_UTR_variant	ENSCAFG00000001875	ENSCAFT00000002969	2008							0/0	99	0/0	99	0/1	99	0/0	99
10	32536268	G	A	116.36	A	NUAK1	downstream_gene_variant	ENSCAFG00000001879	ENSCAFT00000002976						1930		0/1	41	./.	10	0/1	93	0/1	21
10	32536268				A	NUAK1	3_prime_UTR_variant	ENSCAFG00000001879	ENSCAFT00000046483	4424
10	33242206	G	C	199.15	C	APPL2	3_prime_UTR_variant	ENSCAFG00000001885	ENSCAFT00000002989	2123							0/0	99	0/0	90	0/0	99	0/1	99
10	34451323	G	A	701.15	A	SH3RF3	missense_variant	ENSCAFG00000001966	ENSCAFT00000003111	1981	1742	581	P/L	cCg/cTg		tolerated(0.22)	0/0	54	0/0	99	0/0	99	0/1	99
10	34730284	G	A	231.18	A	SH3RF3	synonymous_variant	ENSCAFG00000001966	ENSCAFT00000003111	350	111	37	G	ggC/ggT			0/0	18	0/0	99	0/1	99	0/0	54
10	35378662	A	G	2650.15	G	GCC2	3_prime_UTR_variant	ENSCAFG00000002025	ENSCAFT00000003208	5720							0/0	99	0/0	99	0/0	99	0/1	99
10	40491650	C	T	721.9	T		3_prime_UTR_variant	ENSCAFG00000029466	ENSCAFT00000047526	1664							0/0	21	0/1	99	./.	3	0/0	96
10	40491650				T	SLC9A2	intron_variant	ENSCAFG00000002130	ENSCAFT00000049291
10	40656668	A	G	1017.2	G	IL1RL1	downstream_gene_variant	ENSCAFG00000002142	ENSCAFT00000003371						1622		0/1	99	0/0	48	0/0	99	0/0	99
10	40656668				G	IL1RL1	3_prime_UTR_variant	ENSCAFG00000002142	ENSCAFT00000047744	5009
10	40658061	T	C	83.56	C	IL1RL1	downstream_gene_variant	ENSCAFG00000002142	ENSCAFT00000003371						229		0/0	99	./.	7	0/0	83	0/1	99
10	40658061				C	IL1RL1	3_prime_UTR_variant	ENSCAFG00000002142	ENSCAFT00000047744	3616
10	43247990	G	A	1229.15	A	EIF5B	downstream_gene_variant	ENSCAFG00000002278	ENSCAFT00000049978						865		0/0	99	0/1	99	0/0	99	0/0	99
10	43247990				A	REV1	3_prime_UTR_variant	ENSCAFG00000002260	ENSCAFT00000003562	4889
10	43247990				A	EIF5B	downstream_gene_variant	ENSCAFG00000002278	ENSCAFT00000003577						865
10	43831693	C	T	73.54	T	KIAA1211L	synonymous_variant	ENSCAFG00000002319	ENSCAFT00000043236	525	525	175	P	ccC/ccT			0/1	23	./.	.	0/0	18	./.	6
10	43831693				T	KIAA1211L	synonymous_variant	ENSCAFG00000002319	ENSCAFT00000003633	525	525	175	P	ccC/ccT
10	44106061	C	T	41.16	T	INPP4A	missense_variant	ENSCAFG00000002344	ENSCAFT00000003646	3069	2383	795	V/M	Gtg/Atg		deleterious(0.01)	0/0	36	0/0	75	0/1	74	0/0	24
10	44106061				T	INPP4A	missense_variant	ENSCAFG00000002344	ENSCAFT00000003678	2365	2365	789	V/M	Gtg/Atg		deleterious(0.02)
10	45123050	A	G	1728.15	G	ANKRD39	missense_variant	ENSCAFG00000002396	ENSCAFT00000003755	265	265	89	K/E	Aag/Gag		tolerated(1)	0/0	99	0/0	99	0/0	99	0/1	99
10	45123050				G	ANKRD39	missense_variant	ENSCAFG00000002396	ENSCAFT00000047439	423	265	89	K/E	Aag/Gag		tolerated(0.87)
10	45358789	C	T	3906.15	T	OXER1	downstream_gene_variant	ENSCAFG00000002433	ENSCAFT00000003830						4399		0/0	99	0/1	99	0/0	99	0/0	99
10	45358789				T	KANSL3	3_prime_UTR_variant	ENSCAFG00000002425	ENSCAFT00000003825	4852
10	46325410	A	G	86.94	G	LRPPRC	3_prime_UTR_variant	ENSCAFG00000002527	ENSCAFT00000003990	6272							0/1	28	0/1	96	0/0	45	0/0	75
10	46325410				G	LRPPRC	downstream_gene_variant	ENSCAFG00000002527	ENSCAFT00000003988						1873
10	46370302	T	C	1459.15	C	LRPPRC	missense_variant	ENSCAFG00000002527	ENSCAFT00000003990	2786	2569	857	R/G	Agg/Ggg		deleterious(0.05)	0/0	99	0/0	99	0/0	99	0/1	99
10	46370302				C	LRPPRC	missense_variant	ENSCAFG00000002527	ENSCAFT00000003988	2569	2569	857	R/G	Agg/Ggg		deleterious(0.04)
10	46421661	T	C	839.74	C	LRPPRC	missense_variant	ENSCAFG00000002527	ENSCAFT00000003990	534	317	106	Q/R	cAa/cGa		tolerated(0.11)	1/1	69	0/0	99	0/0	99	0/0	99
10	46421661				C	LRPPRC	missense_variant	ENSCAFG00000002527	ENSCAFT00000003988	317	317	106	Q/R	cAa/cGa		tolerated(0.12)
10	49498935	C	T	764.81	T	EPCAM	3_prime_UTR_variant	ENSCAFG00000002653	ENSCAFT00000035272	1944							0/1	99	./.	1	0/1	99	0/1	99
10	49498935				T	EPCAM	downstream_gene_variant	ENSCAFG00000002653	ENSCAFT00000004180						642
10	55571966	G	C	730.15	C		downstream_gene_variant	ENSCAFG00000029118	ENSCAFT00000043192						3665		0/0	78	0/0	36	0/0	45	0/1	99
10	55571966				C	SPTBN1	3_prime_UTR_variant	ENSCAFG00000002744	ENSCAFT00000004373	8387
10	55571966				C	SPTBN1	downstream_gene_variant	ENSCAFG00000002744	ENSCAFT00000004367						50
10	61542028	C	T	2563.15	T	XPO1	3_prime_UTR_variant	ENSCAFG00000003050	ENSCAFT00000004940	3899							0/1	99	0/0	99	0/0	99	0/0	99
10	63326645	G	A	8372.74	A	MDH1	synonymous_variant	ENSCAFG00000003129	ENSCAFT00000036209	378	378	126	Q	caG/caA			0/0	99	0/0	99	0/0	99	1/1	99
10	63326645				A	MDH1	synonymous_variant	ENSCAFG00000003129	ENSCAFT00000005036	253	159	53	Q	caG/caA
10	64104606	G	T	2288.15	T	AFTPH	5_prime_UTR_variant	ENSCAFG00000003175	ENSCAFT00000005113	159							0/0	99	0/0	99	0/1	99	0/0	99
10	64170874	T	A	119.15	A	AFTPH	3_prime_UTR_variant	ENSCAFG00000003175	ENSCAFT00000005113	3598							0/0	99	0/0	99	0/1	99	0/0	99
10	64170874				A	AFTPH	downstream_gene_variant	ENSCAFG00000003175	ENSCAFT00000005115						543
10	64483350	G	A	1579.88	A	SLC1A4	synonymous_variant	ENSCAFG00000003180	ENSCAFT00000005119	842	291	97	S	tcG/tcA			0/1	57	0/1	90	0/1	99	1/1	48
10	64765213	G	A	4483.54	A	SPRED2	3_prime_UTR_variant	ENSCAFG00000003219	ENSCAFT00000005173	1486							0/1	99	0/1	99	0/1	99	0/0	99
10	68570572	C	T	520.15	T	MXD1	synonymous_variant	ENSCAFG00000032746	ENSCAFT00000045648	771	438	146	I	atC/atT			0/1	99	0/0	99	0/0	99	0/0	99
10	68570590	G	A	178.15	A	MXD1	synonymous_variant	ENSCAFG00000032746	ENSCAFT00000045648	789	456	152	S	tcG/tcA			0/1	99	0/0	99	0/0	99	0/0	87
10	69081825	G	A	140.47	A	ADD2	synonymous_variant	ENSCAFG00000003407	ENSCAFT00000005489	1080	429	143	L	ctC/ctT			./.	12	0/0	33	./.	9	0/1	81
10	69088280	C	T	346	T	ADD2	synonymous_variant	ENSCAFG00000003407	ENSCAFT00000005489	870	219	73	E	gaG/gaA			0/1	88	1/1	21	0/0	15	0/0	24
10	69260923	C	T	83.34	T	ATP6V1B1	upstream_gene_variant	ENSCAFG00000003442	ENSCAFT00000005559						4972		0/0	18	0/0	24	0/1	99	0/0	24
10	69260923				T	VAX2	missense_variant	ENSCAFG00000003434	ENSCAFT00000005524	442	421	141	R/W	Cgg/Tgg		deleterious(0)
11	1831231	C	T	1134.15	T	TBC1D9B	3_prime_UTR_variant	ENSCAFG00000000381	ENSCAFT00000046292	5583							0/0	99	0/0	99	0/1	99	0/0	99
11	1831231				T	TBC1D9B	downstream_gene_variant	ENSCAFG00000000381	ENSCAFT00000000598						1365
11	1831231				T	C5orf45	upstream_gene_variant	ENSCAFG00000000365	ENSCAFT00000000570						2899
11	1917988	G	T	634.15	T	MAML1	downstream_gene_variant	ENSCAFG00000000350	ENSCAFT00000000552						148		0/1	99	0/0	99	0/0	99	0/0	99
11	1917988				T	MAML1	downstream_gene_variant	ENSCAFG00000000350	ENSCAFT00000038429						145
11	1917988				T	MAML1	3_prime_UTR_variant	ENSCAFG00000000350	ENSCAFT00000038428	2515
11	3417228	C	T	275.04	T	N4BP3	missense_variant	ENSCAFG00000000235	ENSCAFT00000000370	1250	1220	407	G/D	gGc/gAc		tolerated(0.4)	0/0	15	0/0	18	0/0	39	1/1	24
11	3503104	G	A	798.15	A	B4GALT7	synonymous_variant	ENSCAFG00000000231	ENSCAFT00000049375	387	387	129	G	ggC/ggT			0/1	99	0/0	99	0/0	99	0/0	99
11	3503104				A	B4GALT7	synonymous_variant	ENSCAFG00000000231	ENSCAFT00000000366	276	276	92	G	ggC/ggT
11	4902500	G	A	347.15	A	TRIM36	missense_variant	ENSCAFG00000000219	ENSCAFT00000000346	733	733	245	R/W	Cgg/Tgg		deleterious(0)	0/1	99	0/0	99	0/0	99	0/0	33
11	5271064	G	C	787.15	C	FEM1C	5_prime_UTR_variant	ENSCAFG00000000210	ENSCAFT00000000333	828							0/1	99	0/0	99	0/0	99	0/0	99
11	12282043	G	A	10135	A		non_coding_exon_variant	ENSCAFG00000030323	ENSCAFT00000045596	701							0/1	99	1/1	99	0/1	99	0/0	99
11	12282043				A	SNCAIP	intron_variant	ENSCAFG00000000522	ENSCAFT00000000818
11	15899564	C	T	4770.52	T	C5orf48	upstream_gene_variant	ENSCAFG00000000592	ENSCAFT00000000911						4020		1/1	99	0/1	99	0/0	99	0/0	99
11	15899564				T	PHAX	3_prime_UTR_variant	ENSCAFG00000000590	ENSCAFT00000000909	1537
11	19779358	G	A	826.15	A	RAPGEF6	3_prime_UTR_variant	ENSCAFG00000024183	ENSCAFT00000001169	4849							0/0	99	0/0	99	0/1	99	0/0	96
11	19779358				A	RAPGEF6	downstream_gene_variant	ENSCAFG00000024183	ENSCAFT00000001172						31
11	22193271	G	C	1937.74	C	C5orf15	missense_variant	ENSCAFG00000029752	ENSCAFT00000047354	1026	52	18	R/G	Cgg/Ggg		tolerated(0.53)	0/0	48	0/0	78	1/1	99	0/0	99
11	22193271				C	VDAC1	downstream_gene_variant	ENSCAFG00000000985	ENSCAFT00000001522						4483
11	22810504	A	G	168.15	G	SEC24A	downstream_gene_variant	ENSCAFG00000001034	ENSCAFT00000001591						305		0/1	99	0/0	78	0/0	99	0/0	93
11	22810504				G	SEC24A	3_prime_UTR_variant	ENSCAFG00000001034	ENSCAFT00000044196	3608
11	22835014	G	A	580.76	A	DDX46	5_prime_UTR_variant	ENSCAFG00000001048	ENSCAFT00000001619	217							0/0	21	0/0	33	1/1	48	0/0	99
11	22835014				A	CAMLG	downstream_gene_variant	ENSCAFG00000029693	ENSCAFT00000043968						2935
11	27465390	G	A	2290.74	A	UHRF2	missense_variant	ENSCAFG00000001381	ENSCAFT00000002134	1715	1715	572	R/K	aGg/aAg		tolerated(0.75)	0/0	99	0/0	99	0/0	99	1/1	99
11	33389812	C	T	1378.15	T	LURAP1L	synonymous_variant	ENSCAFG00000032608	ENSCAFT00000045872	264	264	88	R	cgC/cgT			0/1	99	0/0	99	0/0	99	0/0	99
11	37034948	C	A	95.27	A		synonymous_variant	ENSCAFG00000032537	ENSCAFT00000037808	49	49	17	R	Cgg/Agg			0/1	30	0/1	20	./.	.	./.	11
11	39927693	C	T	1602.15	T	MLLT3	synonymous_variant	ENSCAFG00000001635	ENSCAFT00000002592	1996	1686	562	L	ctG/ctA			0/0	99	0/0	99	0/0	99	0/1	99
11	41201794	T	C	43.06	C	MTAP	downstream_gene_variant	ENSCAFG00000001671	ENSCAFT00000002620						2172		0/1	17	./.	9	0/1	36	./.	.
11	41201794				C	MTAP	3_prime_UTR_variant	ENSCAFG00000001671	ENSCAFT00000045057	3030
11	41261474	A	G	1805.74	G	CDKN2B	missense_variant	ENSCAFG00000001680	ENSCAFT00000002632	161	161	54	M/T	aTg/aCg		deleterious(0.01)	0/0	99	1/1	99	0/0	78	0/0	72
11	43002687	A	T	3684.76	T		stop_gained	ENSCAFG00000014096	ENSCAFT00000022380	365	365	122	L/*	tTa/tAa			0/1	99	0/1	99	0/0	99	0/0	99
11	45061781	T	C	175.01	C	CAAP1	3_prime_UTR_variant	ENSCAFG00000031230	ENSCAFT00000046740	4025							0/1	32	0/1	27	0/1	57	./.	6
11	49811144	G	A	1519.15	A	TOPORS	missense_variant	ENSCAFG00000001809	ENSCAFT00000002842	1762	1762	588	R/C	Cgt/Tgt		tolerated(0.17)	0/1	99	0/0	99	0/0	99	0/0	99
11	50523571	G	T	4275.15	T	AQP3	5_prime_UTR_variant	ENSCAFG00000023922	ENSCAFT00000002928	177							0/0	99	0/1	99	0/0	99	0/0	99
11	50538798	G	A	1599.74	A	NOL6	synonymous_variant	ENSCAFG00000001869	ENSCAFT00000002968	2072	1524	508	G	ggC/ggT			0/0	99	0/0	99	0/0	99	1/1	99
11	50697800	A	C	6540.74	C	UBAP2	missense_variant	ENSCAFG00000001891	ENSCAFT00000002996	1838	1838	613	V/G	gTa/gGa		tolerated(0.06)	0/0	99	0/0	99	0/0	99	1/1	99
11	50697800				C	SNORD121A	upstream_gene_variant	ENSCAFG00000028271	ENSCAFT00000042554						4944
11	50697800				C	UBAP2	missense_variant	ENSCAFG00000001891	ENSCAFT00000046654	1807	1766	589	V/G	gTa/gGa		tolerated(0.08)
11	51666527	A	T	1879.74	T	PIGO	intron_variant	ENSCAFG00000002000	ENSCAFT00000003169								0/0	99	0/0	99	1/1	99	0/0	99
11	51666527				T	PIGO	missense_variant	ENSCAFG00000002000	ENSCAFT00000003168	2065	2065	689	Y/N	Tat/Aat		tolerated(0.08)
11	51934505	C	T	287.15	T	UNC13B	stop_gained	ENSCAFG00000002030	ENSCAFT00000003214	4114	3703	1235	R/*	Cga/Tga			0/1	99	0/0	84	0/0	99	0/0	69
11	53894766	G	A	66.92	A		3_prime_UTR_variant	ENSCAFG00000031129	ENSCAFT00000043992	2376							0/1	98	./.	9	./.	.	0/0	27
11	54328931	G	T	822.93	T		upstream_gene_variant	ENSCAFG00000002397	ENSCAFT00000003759						184		0/0	21	./.	12	1/1	66	0/0	81
11	54328931				T		5_prime_UTR_variant	ENSCAFG00000002397	ENSCAFT00000046406	369
11	55316761	G	T	295.06	T		synonymous_variant	ENSCAFG00000002471	ENSCAFT00000003894	1037	966	322	A	gcC/gcA			0/1	26	0/0	15	./.	9	1/1	18
11	55454950	G	A	51.2	A	TBC1D2	5_prime_UTR_variant	ENSCAFG00000002483	ENSCAFT00000003919	125							0/1	84	0/0	30	0/0	15	0/0	39
11	60715312	G	A	525.99	A	NIPSNAP3A	upstream_gene_variant	ENSCAFG00000023949	ENSCAFT00000004245						43		./.	3	./.	12	0/0	51	0/1	99
11	60715312				A	NIPSNAP3A	5_prime_UTR_variant	ENSCAFG00000023949	ENSCAFT00000037890	150
11	62457767	C	T	2102.74	T	ZNF462	synonymous_variant	ENSCAFG00000002774	ENSCAFT00000004432	2366	2139	713	N	aaC/aaT			0/0	99	0/0	99	0/0	99	1/1	99
11	62754707	C	T	3225.28	T	RAD23B	missense_variant	ENSCAFG00000002792	ENSCAFT00000004463	377	377	126	T/I	aCt/aTt		tolerated(0.14)	0/1	99	0/0	99	0/0	99	0/0	99
11	62886590	C	T	1558.65	T	KLF4	5_prime_UTR_variant	ENSCAFG00000002797	ENSCAFT00000045232	290							0/1	33	1/1	99	0/0	66	./.	12
11	62886590				T	KLF4	5_prime_UTR_variant	ENSCAFG00000002797	ENSCAFT00000004467	290
11	64029122	C	G	80.36	G	ACTL7B	missense_variant	ENSCAFG00000002799	ENSCAFT00000004471	336	336	112	E/D	gaG/gaC		tolerated(1)	./.	9	0/0	21	0/1	33	0/0	33
11	64029122				G	ACTL7A	upstream_gene_variant	ENSCAFG00000002803	ENSCAFT00000004478						3344
11	64526310	G	C	3060.15	C	PTPN3	missense_variant	ENSCAFG00000002868	ENSCAFT00000004599	1355	1199	400	A/G	gCg/gGg		tolerated(0.24)	0/0	99	0/0	99	0/1	99	0/0	99
11	65145289	G	A	2410.76	A	PALM2	synonymous_variant	ENSCAFG00000002894	ENSCAFT00000044537	2754	2754	918	V	gtG/gtA			0/1	99	0/0	99	0/1	99	0/0	99
11	65145289				A	PALM2	synonymous_variant	ENSCAFG00000002894	ENSCAFT00000004646	1371	1371	457	V	gtG/gtA
11	69137351	C	T	358.15	T	TNC	synonymous_variant	ENSCAFG00000003426	ENSCAFT00000047096	1797	1374	458	P	ccG/ccA			0/0	57	0/0	39	0/0	99	0/1	99
11	69137351				T	TNC	synonymous_variant	ENSCAFG00000003426	ENSCAFT00000005551	1464	1464	488	P	ccG/ccA
11	73601748	C	T	3546.01	T	CDK5RAP2	missense_variant	ENSCAFG00000003560	ENSCAFT00000005724	2731	2548	850	A/T	Gct/Act		tolerated(0.28)	0/1	99	1/1	99	0/1	99	0/0	99
11	73601879	C	G	7352.01	G	CDK5RAP2	missense_variant	ENSCAFG00000003560	ENSCAFT00000005724	2600	2417	806	G/A	gGt/gCt		tolerated(1)	0/1	99	1/1	99	0/1	99	0/0	99
11	73861345	G	C	654.15	C		missense_variant	ENSCAFG00000003574	ENSCAFT00000005740	1200	1200	400	I/M	atC/atG		deleterious(0.05)	0/0	99	0/1	99	0/0	99	0/0	99
11	73878286	A	T	454.15	T		upstream_gene_variant	ENSCAFG00000003577	ENSCAFT00000005742						2376		0/1	99	0/0	99	0/0	99	0/0	99
11	73878286				T		upstream_gene_variant	ENSCAFG00000003574	ENSCAFT00000005740						2193
11	73878286				T		missense_variant	ENSCAFG00000031862	ENSCAFT00000043922	884	884	295	D/V	gAt/gTt		deleterious(0.04)
11	73895666	G	A	733.15	A	PHF19	3_prime_UTR_variant	ENSCAFG00000003581	ENSCAFT00000046528	2630							0/0	99	0/0	99	0/1	99	0/0	99
11	73895666				A	PHF19	downstream_gene_variant	ENSCAFG00000003581	ENSCAFT00000005752						1393
11	73896670	C	T	35.9	T	PHF19	3_prime_UTR_variant	ENSCAFG00000003581	ENSCAFT00000046528	1626							./.	.	./.	.	0/1	23	0/1	36
11	73896670				T	PHF19	downstream_gene_variant	ENSCAFG00000003581	ENSCAFT00000005752						389
11	73896826	G	A	1593.54	A	PHF19	synonymous_variant	ENSCAFG00000003581	ENSCAFT00000046528	1470	1248	416	S	agC/agT			0/1	99	0/0	99	0/1	99	0/1	99
11	73896826				A	PHF19	downstream_gene_variant	ENSCAFG00000003581	ENSCAFT00000005752						233
11	73928629	T	C	63.15	C		intron_variant	ENSCAFG00000032755	ENSCAFT00000046924								0/1	96	0/0	96	0/0	99	0/0	99
11	73928629				C	TRAF1	missense_variant	ENSCAFG00000003587	ENSCAFT00000035950	688	485	162	Y/C	tAc/tGc		tolerated(0.1)
12	319517	T	C	356.15	C	TRIM39	synonymous_variant	ENSCAFG00000000388	ENSCAFT00000000617	112	105	35	Y	taT/taC			0/0	99	0/0	99	0/0	99	0/1	99
12	401583	C	T	2045.15	T	ABCF1	missense_variant	ENSCAFG00000030478	ENSCAFT00000046193	281	71	24	T/I	aCc/aTc		deleterious(0.01)	0/0	99	0/0	99	0/0	99	0/1	99
12	401583				T	ABCF1	missense_variant	ENSCAFG00000030478	ENSCAFT00000000632	233	233	78	T/I	aCc/aTc		tolerated(0.16)
12	417598	C	T	470.15	T	PPP1R10	downstream_gene_variant	ENSCAFG00000000406	ENSCAFT00000000645						82		0/1	99	0/0	99	0/0	99	0/0	99
12	417598				T	PPP1R10	3_prime_UTR_variant	ENSCAFG00000000406	ENSCAFT00000048295	2916
12	435210	T	C	68.62	C	MRPS18B	missense_variant	ENSCAFG00000000411	ENSCAFT00000000648	17	17	6	L/S	tTg/tCg		deleterious(0)	./.	6	0/0	24	0/0	18	0/1	61
12	482864	G	C	656.15	C	NRM	missense_variant	ENSCAFG00000000437	ENSCAFT00000000694	2307	2307	769	D/E	gaC/gaG		tolerated(1)	0/0	99	0/0	99	0/0	99	0/1	99
12	662997	G	A	1297.15	A	DDR1	missense_variant	ENSCAFG00000000448	ENSCAFT00000044691	1068	1040	347	R/Q	cGg/cAg		tolerated(0.14)	0/0	99	0/0	99	0/0	99	0/1	99
12	662997				A	DDR1	missense_variant	ENSCAFG00000000448	ENSCAFT00000000714	848	848	283	R/Q	cGg/cAg		tolerated(0.25)
12	662997				A	DPCR1	intron_variant	ENSCAFG00000000470	ENSCAFT00000047683
12	684382	C	T	401.15	T	VARS2	synonymous_variant	ENSCAFG00000000454	ENSCAFT00000037049	777	768	256	A	gcC/gcT			0/0	93	0/0	99	0/0	99	0/1	99
12	684382				T	VARS2	synonymous_variant	ENSCAFG00000000454	ENSCAFT00000000742	792	792	264	A	gcC/gcT
12	684382				T	GTF2H4	downstream_gene_variant	ENSCAFG00000032081	ENSCAFT00000000727						2970
12	684382				T	DPCR1	intron_variant	ENSCAFG00000000470	ENSCAFT00000047683
12	686830	C	T	631.15	T	VARS2	synonymous_variant	ENSCAFG00000000454	ENSCAFT00000037049	1272	1263	421	T	acC/acT			0/0	99	0/0	99	0/0	99	0/1	99
12	686830				T	VARS2	synonymous_variant	ENSCAFG00000000454	ENSCAFT00000000742	1305	1305	435	T	acC/acT
12	686830				T	DPCR1	intron_variant	ENSCAFG00000000470	ENSCAFT00000047683
12	687030	C	T	151.15	T	VARS2	missense_variant	ENSCAFG00000000454	ENSCAFT00000037049	1348	1339	447	R/W	Cgg/Tgg		deleterious(0)	0/0	36	0/0	57	0/0	99	0/1	99
12	687030				T	VARS2	missense_variant	ENSCAFG00000000454	ENSCAFT00000000742	1381	1381	461	R/W	Cgg/Tgg		deleterious(0)
12	687030				T	DPCR1	intron_variant	ENSCAFG00000000470	ENSCAFT00000047683
12	693597	G	T	42.15	T	VARS2	missense_variant	ENSCAFG00000000454	ENSCAFT00000037049	2983	2974	992	D/Y	Gac/Tac		deleterious(0)	0/1	75	0/0	72	0/0	93	0/0	36
12	693597				T	VARS2	missense_variant	ENSCAFG00000000454	ENSCAFT00000000742	3016	3016	1006	D/Y	Gac/Tac		deleterious(0)
12	693597				T	DPCR1	intron_variant	ENSCAFG00000000470	ENSCAFT00000047683
12	853725	A	T	1258.76	T	CCHCR1	missense_variant	ENSCAFG00000000478	ENSCAFT00000000761	324	324	108	H/Q	caT/caA		deleterious(0.02)	0/0	93	0/0	99	0/1	99	0/1	99
12	853725				T	CCHCR1	intron_variant	ENSCAFG00000000478	ENSCAFT00000046522
12	853725				T	TCF19	upstream_gene_variant	ENSCAFG00000000483	ENSCAFT00000000764						2111
12	855874	G	A	32.36	A	CCHCR1	upstream_gene_variant	ENSCAFG00000000478	ENSCAFT00000000761						1490		0/0	30	0/0	24	0/0	48	0/1	65
12	855874				A	CCHCR1	upstream_gene_variant	ENSCAFG00000000478	ENSCAFT00000046522						1857
12	855874				A	TCF19	5_prime_UTR_variant	ENSCAFG00000000483	ENSCAFT00000000764	39
12	892609	G	A	1215.76	A	DLA88	intron_variant	ENSCAFG00000000487	ENSCAFT00000000779								0/1	99	0/0	99	0/1	99	0/0	99
12	892609				A	DLA88	3_prime_UTR_variant	ENSCAFG00000000487	ENSCAFT00000000775	1280
12	895688	C	T	1518.15	T	DLA88	missense_variant	ENSCAFG00000000487	ENSCAFT00000000779	4	4	2	E/K	Gag/Aag		tolerated(0.86)	0/0	99	0/0	99	0/0	99	0/1	99
12	895688				T	DLA88	missense_variant	ENSCAFG00000000487	ENSCAFT00000000775	4	4	2	E/K	Gag/Aag		tolerated(0.86)
12	933315	T	C	1068.15	C	DLA-12	missense_variant	ENSCAFG00000032222	ENSCAFT00000036086	4	4	2	W/R	Tgg/Cgg		tolerated(0.19)	0/0	99	0/0	99	0/1	99	0/0	99
12	935421	G	T	726.16	T	DLA-12	missense_variant	ENSCAFG00000032222	ENSCAFT00000036086	958	958	320	A/S	Gct/Tct		tolerated(0.14)	0/1	99	0/0	21	0/0	93	0/0	99
12	936422	C	T	2159.76	T	DLA-12	3_prime_UTR_variant	ENSCAFG00000032222	ENSCAFT00000036086	1267							0/1	99	0/0	99	0/1	99	0/0	99
12	936447	G	A	668.15	A	DLA-12	3_prime_UTR_variant	ENSCAFG00000032222	ENSCAFT00000036086	1292							0/0	99	0/0	99	0/0	99	0/1	99
12	983941	C	G	2155.15	G	DLA-64	missense_variant	ENSCAFG00000000500	ENSCAFT00000036073	172	172	58	L/V	Ctg/Gtg		tolerated(1)	0/1	99	0/0	99	0/0	99	0/0	99
12	985778	G	T	3339.15	T	DLA-64	missense_variant	ENSCAFG00000000500	ENSCAFT00000036073	958	958	320	A/S	Gct/Tct		tolerated(0.12)	0/1	99	0/0	99	0/0	30	0/0	54
12	986708	G	T	3410.15	T	DLA-64	3_prime_UTR_variant	ENSCAFG00000000500	ENSCAFT00000036073	1183							0/0	99	0/0	99	0/0	99	0/1	99
12	1021412	G	C	8478.64	C	DLA88	missense_variant	ENSCAFG00000000492	ENSCAFT00000000791	106	106	36	H/D	Cac/Gac		tolerated(0.24)	1/1	23	./.	.	1/1	99	./.	3
12	1031337	G	A	141.3	A	MCCD1	synonymous_variant	ENSCAFG00000000506	ENSCAFT00000000793	150	150	50	K	aaG/aaA			0/1	95	0/0	21	0/0	24	./.	12
12	1031337				A	DDX39B	3_prime_UTR_variant	ENSCAFG00000000509	ENSCAFT00000000797	3156
12	1031337				A	DDX39B	downstream_gene_variant	ENSCAFG00000000509	ENSCAFT00000036511						1261
12	1209870	C	A	498.15	A		downstream_gene_variant	ENSCAFG00000000604	ENSCAFT00000037840						1267		0/1	99	0/0	93	0/0	99	0/0	99
12	1209870				A	CLIC1	downstream_gene_variant	ENSCAFG00000000621	ENSCAFT00000000962						97
12	1209870				A	CLIC1	3_prime_UTR_variant	ENSCAFG00000000621	ENSCAFT00000035841	1075
12	1209870				A	DDAH2	upstream_gene_variant	ENSCAFG00000000617	ENSCAFT00000000953						1523
12	1215131	T	C	854.15	C	CLIC1	5_prime_UTR_variant	ENSCAFG00000000621	ENSCAFT00000000962	99							0/1	99	0/0	99	0/0	99	0/0	99
12	1215131				C	CLIC1	5_prime_UTR_variant	ENSCAFG00000000621	ENSCAFT00000035841	99
12	1286654	C	T	438.17	T		synonymous_variant	ENSCAFG00000000640	ENSCAFT00000000984	1194	1194	398	P	ccC/ccT			0/1	99	./.	.	0/1	44	./.	.
12	1286654				T		downstream_gene_variant	ENSCAFG00000031421	ENSCAFT00000047782						3829
12	1286654				T	HSPA1L	upstream_gene_variant	ENSCAFG00000000639	ENSCAFT00000000983						3257
12	1321122	T	C	56.1	C	NEU1	3_prime_UTR_variant	ENSCAFG00000000642	ENSCAFT00000000988	4301							0/1	30	0/1	29	./.	12	0/1	26
12	1400300	C	T	896.35	T		missense_variant	ENSCAFG00000000686	ENSCAFT00000001075	13	13	5	L/F	Ctc/Ttc		tolerated(0.29)	0/1	99	0/0	15	./.	12	0/0	15
12	1400300				T		downstream_gene_variant	ENSCAFG00000000686	ENSCAFT00000001072						529
12	1400300				T		intron_variant	ENSCAFG00000000686	ENSCAFT00000001071
12	1400590	G	T	202.3	T		synonymous_variant	ENSCAFG00000000686	ENSCAFT00000001075	213	213	71	V	gtG/gtT			0/1	99	./.	12	0/0	39	0/0	15
12	1400590				T		downstream_gene_variant	ENSCAFG00000000686	ENSCAFT00000001072						819
12	1400590				T		synonymous_variant	ENSCAFG00000000686	ENSCAFT00000001071	1716	1716	572	V	gtG/gtT
12	1420451	G	A	40.01	A	DOM3Z	downstream_gene_variant	ENSCAFG00000000694	ENSCAFT00000001079						4200		./.	3	0/0	18	./.	6	0/1	71
12	1420451				A	SKIV2L	intron_variant	ENSCAFG00000000679	ENSCAFT00000001053
12	1420451				A	DOM3Z	3_prime_UTR_variant	ENSCAFG00000000694	ENSCAFT00000038598	5415
12	1424750	C	T	115.16	T	DOM3Z	synonymous_variant	ENSCAFG00000000694	ENSCAFT00000001079	1008	1008	336	V	gtG/gtA			0/1	99	0/0	63	0/0	24	0/0	45
12	1424750				T	SKIV2L	downstream_gene_variant	ENSCAFG00000000679	ENSCAFT00000001053						284
12	1424750				T	DOM3Z	synonymous_variant	ENSCAFG00000000694	ENSCAFT00000038598	1116	1116	372	V	gtG/gtA
12	1425139	G	A	66.15	A	DOM3Z	missense_variant	ENSCAFG00000000694	ENSCAFT00000001079	842	842	281	T/I	aCc/aTc		tolerated(0.12)	0/1	99	0/0	75	0/0	36	0/0	45
12	1425139				A	SKIV2L	downstream_gene_variant	ENSCAFG00000000679	ENSCAFT00000001053						673
12	1425139				A	DOM3Z	missense_variant	ENSCAFG00000000694	ENSCAFT00000038598	950	950	317	T/I	aCc/aTc		tolerated(0.22)
12	1472727	C	A	599.77	A	TNXB	synonymous_variant	ENSCAFG00000000751	ENSCAFT00000001166	6995	6984	2328	T	acG/acT			0/1	99	0/0	81	0/1	99	0/0	24
12	1472727				A	TNXB	synonymous_variant	ENSCAFG00000000751	ENSCAFT00000046665	7080	7080	2360	T	acG/acT
12	1472727				A	DOM3Z	intron_variant	ENSCAFG00000000694	ENSCAFT00000001079
12	1475683	C	A	1058.77	A	TNXB	synonymous_variant	ENSCAFG00000000751	ENSCAFT00000001166	6326	6315	2105	T	acG/acT			0/1	99	0/0	90	0/1	99	0/0	24
12	1475683				A	TNXB	synonymous_variant	ENSCAFG00000000751	ENSCAFT00000046665	6723	6723	2241	T	acG/acT
12	1475683				A	DOM3Z	intron_variant	ENSCAFG00000000694	ENSCAFT00000001079
12	1591435	G	C	130.55	C	NOTCH4	missense_variant	ENSCAFG00000000791	ENSCAFT00000045934	4152	3698	1233	P/R	cCt/cGt		tolerated(0.5)	0/1	80	0/0	24	0/0	45	./.	9
12	1591435				C	DOM3Z	intron_variant	ENSCAFG00000000694	ENSCAFT00000001079
12	1591435				C	NOTCH4	missense_variant	ENSCAFG00000000791	ENSCAFT00000001228	4073	4073	1358	P/R	cCt/cGt		tolerated(0.64)
12	1591704	C	T	64.89	T	NOTCH4	synonymous_variant	ENSCAFG00000000791	ENSCAFT00000045934	3883	3429	1143	A	gcG/gcA			0/1	97	0/0	33	0/0	48	./.	3
12	1591704				T	DOM3Z	intron_variant	ENSCAFG00000000694	ENSCAFT00000001079
12	1591704				T	NOTCH4	synonymous_variant	ENSCAFG00000000791	ENSCAFT00000001228	3804	3804	1268	A	gcG/gcA
12	2246643	C	G	272.15	G	DLA-DQBC1	missense_variant	ENSCAFG00000000814	ENSCAFT00000001279	666	664	222	A/P	Gca/Cca		tolerated(0.27)	0/0	99	0/0	99	0/0	33	0/1	99
12	2416566	C	A	4358.15	A	TAP2	missense_variant	ENSCAFG00000000823	ENSCAFT00000001291	333	333	111	W/C	tgG/tgT		tolerated(0.19)	0/0	99	0/0	99	0/0	99	0/1	99
12	2416566				A	PSMB8	downstream_gene_variant	ENSCAFG00000000829	ENSCAFT00000001293						2890
12	2501586	G	A	67.2	A		3_prime_UTR_variant	ENSCAFG00000032102	ENSCAFT00000043628	2628							0/0	33	0/0	57	0/0	15	0/1	50
12	2503409	T	C	1633.15	C		3_prime_UTR_variant	ENSCAFG00000032102	ENSCAFT00000043628	805							0/0	99	0/0	99	0/0	78	0/1	99
12	2674225	C	T	748.15	T	cfa-mir-219-1	downstream_gene_variant	ENSCAFG00000025737	ENSCAFT00000040020						3235		0/1	99	0/0	99	0/0	99	0/0	99
12	2674225				T	HSD17B8	downstream_gene_variant	ENSCAFG00000000927	ENSCAFT00000001431						4484
12	2674225				T	RING1	synonymous_variant	ENSCAFG00000000933	ENSCAFT00000001442	962	762	254	S	agC/agT
12	2674225				T	RING1	synonymous_variant	ENSCAFG00000000933	ENSCAFT00000044064	822	762	254	S	agC/agT
12	2740466	G	T	2295.15	T	RGL2	upstream_gene_variant	ENSCAFG00000000963	ENSCAFT00000001495						1680		0/1	99	0/0	99	0/0	99	0/0	99
12	2740466				T	TAPBP	3_prime_UTR_variant	ENSCAFG00000000972	ENSCAFT00000001502	2553
12	2740466				T		downstream_gene_variant	ENSCAFG00000031301	ENSCAFT00000047587						684
12	2742834	G	T	1291.15	T	RGL2	upstream_gene_variant	ENSCAFG00000000963	ENSCAFT00000001495						4048		0/1	99	0/0	99	0/0	99	0/0	99
12	2742834				T	TAPBP	missense_variant	ENSCAFG00000000972	ENSCAFT00000001502	1477	1168	390	P/T	Ccc/Acc		tolerated(0.38)
12	2742834				T		downstream_gene_variant	ENSCAFG00000031301	ENSCAFT00000047587						3052
12	2826233	C	T	32.43	T	CUTA	downstream_gene_variant	ENSCAFG00000001008	ENSCAFT00000043937						1374		./.	9	0/0	15	0/1	63	./.	.
12	2826233				T	PHF1	downstream_gene_variant	ENSCAFG00000000998	ENSCAFT00000001547						46
12	2826233				T	KIFC1	intron_variant	ENSCAFG00000000987	ENSCAFT00000043299
12	2826233				T	PHF1	synonymous_variant	ENSCAFG00000000998	ENSCAFT00000001542	1317	1317	439	D	gaC/gaT
12	2826233				T	CUTA	downstream_gene_variant	ENSCAFG00000001008	ENSCAFT00000001551						1371
12	3063722	T	G	1500.15	G	MNF1	missense_variant	ENSCAFG00000031270	ENSCAFT00000001836	59	59	20	E/A	gAg/gCg		tolerated(0.08)	0/1	99	0/0	99	0/0	99	0/0	99
12	3115276	G	A	5734.74	A	LEMD2	3_prime_UTR_variant	ENSCAFG00000001191	ENSCAFT00000001843	2010							0/0	99	0/0	99	0/0	99	1/1	99
12	3131597	C	G	141.69	G	LEMD2	missense_variant	ENSCAFG00000001191	ENSCAFT00000001843	323	323	108	R/P	cGg/cCg		tolerated(0.07)	0/0	15	./.	6	./.	12	0/1	99
12	3131597				G		missense_variant	ENSCAFG00000032320	ENSCAFT00000049373	896	896	299	P/R	cCg/cGg
12	4578984	C	T	4566.15	T	PPARD	3_prime_UTR_variant	ENSCAFG00000001310	ENSCAFT00000002032	1632							0/1	99	0/0	99	0/0	99	0/0	99
12	4579954	C	T	2846.15	T	PPARD	3_prime_UTR_variant	ENSCAFG00000001310	ENSCAFT00000002032	2602							0/0	99	0/0	99	0/1	99	0/0	99
12	4611068	C	G	2059.15	G	TEAD3	downstream_gene_variant	ENSCAFG00000001326	ENSCAFT00000002062						991		0/1	99	0/0	99	0/0	99	0/0	99
12	4611068				G	TEAD3	3_prime_UTR_variant	ENSCAFG00000001326	ENSCAFT00000002060	2775
12	5752004	G	A	1169.15	A	CDKN1A	synonymous_variant	ENSCAFG00000029853	ENSCAFT00000044360	384	273	91	G	ggG/ggA			0/0	99	0/0	99	0/0	99	0/1	99
12	6679662	G	A	2933.94	A	MDGA1	synonymous_variant	ENSCAFG00000001488	ENSCAFT00000002308	1675	519	173	S	tcC/tcT			0/0	99	0/0	99	0/1	99	0/0	99
12	7585535	C	A	1745.15	A	GLO1	3_prime_UTR_variant	ENSCAFG00000029506	ENSCAFT00000043789	1091							0/1	99	0/0	99	0/0	99	0/0	99
12	8117390	T	C	2007.15	C	KCNK5	3_prime_UTR_variant	ENSCAFG00000029359	ENSCAFT00000046762	1860							0/0	99	0/0	99	0/0	99	0/1	99
12	8118186	T	C	4958.15	C	KCNK5	synonymous_variant	ENSCAFG00000029359	ENSCAFT00000046762	1064	705	235	A	gcA/gcG			0/0	99	0/0	99	0/0	99	0/1	99
12	10292556	C	T	1351.74	T	FOXP4	3_prime_UTR_variant	ENSCAFG00000001596	ENSCAFT00000002501	3500							0/0	99	0/0	99	0/0	99	1/1	99
12	10339376	G	A	176.2	A	MDFI	3_prime_UTR_variant	ENSCAFG00000001597	ENSCAFT00000002502	1765							0/1	99	0/0	48	0/0	99	./.	9
12	10339407	C	A	1498.86	A	MDFI	3_prime_UTR_variant	ENSCAFG00000001597	ENSCAFT00000002502	1796							0/1	99	1/1	48	0/0	99	./.	9
12	10736415	G	C	2967.54	C	C6orf132	missense_variant	ENSCAFG00000031768	ENSCAFT00000049988	1954	1954	652	P/A	Ccc/Gcc		tolerated(1)	0/1	99	0/1	99	0/1	99	0/0	99
12	10840842	C	T	108.75	T	TRERF1	3_prime_UTR_variant	ENSCAFG00000001642	ENSCAFT00000002578	5035							./.	9	./.	6	0/1	99	0/0	24
12	10841715	C	T	264.45	T	TRERF1	3_prime_UTR_variant	ENSCAFG00000001642	ENSCAFT00000002578	4162							./.	9	0/0	39	0/1	99	./.	12
12	11574120	G	A	323.78	A	CUL7	5_prime_UTR_variant	ENSCAFG00000001774	ENSCAFT00000049857	366							0/0	39	0/0	42	0/0	99	1/1	30
12	11574120				A	PTCRA	intron_variant	ENSCAFG00000031615	ENSCAFT00000048353
12	11574120				A	MRPL2	downstream_gene_variant	ENSCAFG00000001782	ENSCAFT00000002798						425
12	11574120				A	CUL7	upstream_gene_variant	ENSCAFG00000001774	ENSCAFT00000002791						925
12	11668802	C	T	2691.15	T	PTCRA	intron_variant	ENSCAFG00000031615	ENSCAFT00000048353								0/0	99	0/0	99	0/1	99	0/0	99
12	11668802				T	SRF	synonymous_variant	ENSCAFG00000001829	ENSCAFT00000002887	927	927	309	S	agC/agT
12	11692927	C	A	872.15	A	PTCRA	intron_variant	ENSCAFG00000031615	ENSCAFT00000048353								0/0	99	0/1	99	0/0	99	0/0	66
12	11692927				A	CUL9	synonymous_variant	ENSCAFG00000001834	ENSCAFT00000002890	4493	4086	1362	L	ctC/ctA
12	11715117	G	C	110.99	C	DNPH1	downstream_gene_variant	ENSCAFG00000001837	ENSCAFT00000002894						229		0/1	99	0/0	39	0/0	54	0/0	99
12	11715117				C	PTCRA	intron_variant	ENSCAFG00000031615	ENSCAFT00000048353
12	11715117				C	CUL9	3_prime_UTR_variant	ENSCAFG00000001834	ENSCAFT00000002890	8656
12	11830401	G	A	1743.74	A	ZNF318	missense_variant	ENSCAFG00000001847	ENSCAFT00000002912	2309	2309	770	A/V	gCc/gTc		tolerated(0.19)	0/0	93	0/0	99	0/0	99	1/1	99
12	11830401				A	ZNF318	missense_variant	ENSCAFG00000001847	ENSCAFT00000045907	2464	2366	789	A/V	gCc/gTc
12	11831171	G	T	37.15	T	ZNF318	missense_variant	ENSCAFG00000001847	ENSCAFT00000002912	1539	1539	513	S/R	agC/agA		tolerated(0.14)	0/1	70	0/0	99	0/0	99	0/0	99
12	11831171				T	ZNF318	missense_variant	ENSCAFG00000001847	ENSCAFT00000045907	1694	1596	532	S/R	agC/agA
12	12822595	G	A	470.15	A	CDC5L	synonymous_variant	ENSCAFG00000001996	ENSCAFT00000003163	2713	2355	785	Q	caG/caA			0/1	99	0/0	99	0/0	99	0/0	99
12	15672710	G	A	1124.15	A	CD2AP	synonymous_variant	ENSCAFG00000002089	ENSCAFT00000003306	1973	1710	570	S	tcG/tcA			0/0	99	0/1	99	0/0	99	0/0	99
12	19942653	T	C	9926.52	C	MCM3	missense_variant	ENSCAFG00000002196	ENSCAFT00000003463	563	298	100	I/V	Ata/Gta		tolerated(1)	0/1	99	1/1	99	0/0	99	0/0	99
12	20347771	A	G	87.51	G		downstream_gene_variant	ENSCAFG00000002230	ENSCAFT00000043060						2272		./.	3	./.	.	0/0	24	0/1	99
12	20347771				G		3_prime_UTR_variant	ENSCAFG00000002230	ENSCAFT00000048854	2542
12	20347771				G		downstream_gene_variant	ENSCAFG00000002230	ENSCAFT00000003517						1637
12	20353155	T	A	41.04	A		missense_variant	ENSCAFG00000002230	ENSCAFT00000043060	298	298	100	R/W	Agg/Tgg		deleterious(0.01)	0/1	67	0/0	69	0/0	15	./.	3
12	20353155				A		intron_variant	ENSCAFG00000002230	ENSCAFT00000048854
12	20353155				A		intron_variant	ENSCAFG00000002230	ENSCAFT00000003517
12	21048066	C	T	267.11	T	GCLC	5_prime_UTR_variant	ENSCAFG00000002288	ENSCAFT00000003595	664							./.	3	1/1	18	./.	6	0/0	15
12	22340638	T	C	72.18	C	FAM83B	3_prime_UTR_variant	ENSCAFG00000002327	ENSCAFT00000003643	5959							0/0	18	0/0	99	0/0	96	0/1	99
12	23715923	C	T	508.76	T	DST	downstream_gene_variant	ENSCAFG00000002413	ENSCAFT00000003820						715		0/1	99	0/1	99	0/0	72	0/0	51
12	23715923				T	DST	3_prime_UTR_variant	ENSCAFG00000002413	ENSCAFT00000043203	24232
12	23715923				T		downstream_gene_variant	ENSCAFG00000003053	ENSCAFT00000004904						2659
12	23732666	C	T	412.76	T	DST	missense_variant	ENSCAFG00000002413	ENSCAFT00000003820	14083	14083	4695	A/T	Gca/Aca		tolerated(0.54)	0/0	66	0/0	75	0/0	99	1/1	33
12	23732666				T	DST	missense_variant	ENSCAFG00000002413	ENSCAFT00000043203	22069	21853	7285	A/T	Gca/Aca		tolerated(0.51)
12	23817909	T	C	293.4	C	DST	synonymous_variant	ENSCAFG00000002413	ENSCAFT00000003820	6060	6060	2020	T	acA/acG			0/0	15	0/0	30	0/1	99	./.	9
12	23817909				C	DST	synonymous_variant	ENSCAFG00000002413	ENSCAFT00000043203	14046	13830	4610	T	acA/acG
12	33691459	G	A	43.25	A	OGFRL1	3_prime_UTR_variant	ENSCAFG00000032206	ENSCAFT00000043836	1995							0/1	13	0/0	42	0/1	13	0/1	56
12	39027007	G	T	1192.18	T		3_prime_UTR_variant	ENSCAFG00000002782	ENSCAFT00000004445	4318							0/1	99	0/0	99	0/0	99	0/0	99
12	40915774	G	C	2041.4	C	TTK	upstream_gene_variant	ENSCAFG00000002842	ENSCAFT00000004549						1252		0/0	21	0/1	99	0/1	99	0/0	75
12	40915774				C	TTK	5_prime_UTR_variant	ENSCAFG00000002842	ENSCAFT00000042939	350
12	43625021	A	G	3668.15	G	ME1	3_prime_UTR_variant	ENSCAFG00000002941	ENSCAFT00000044644	1724							0/0	99	0/0	99	0/1	99	0/0	99
12	54228161	A	C	1123.74	C	MANEA	3_prime_UTR_variant	ENSCAFG00000031056	ENSCAFT00000049697	4661							0/0	69	0/0	78	0/0	69	1/1	87
12	55021538	A	G	128.15	G	UFL1	missense_variant	ENSCAFG00000003430	ENSCAFT00000005519	2288	2288	763	N/S	aAt/aGt		tolerated(0.59)	0/0	99	0/0	99	0/1	99	0/0	99
12	55613218	C	T	37.45	T	MMS22L	missense_variant	ENSCAFG00000003458	ENSCAFT00000043459	2151	2105	702	G/E	gGa/gAa		tolerated(0.5)	./.	9	0/0	30	./.	9	0/1	30
12	55613218				T	MMS22L	missense_variant	ENSCAFG00000003458	ENSCAFT00000005564	2961	2786	929	G/E	gGa/gAa		tolerated(0.52)
12	57601275	T	C	143.15	C	COQ3	synonymous_variant	ENSCAFG00000003469	ENSCAFT00000005578	159	159	53	L	ctA/ctG			0/1	99	0/0	57	0/0	57	0/0	48
12	65552952	C	A	14854	A	FOXO3	synonymous_variant	ENSCAFG00000003783	ENSCAFT00000006080	643	483	161	A	gcC/gcA			0/1	99	0/1	99	1/1	99	0/1	99
12	65552952				A		upstream_gene_variant	ENSCAFG00000026584	ENSCAFT00000040867						2040
12	67227641	A	C	194.15	C	CDK19	3_prime_UTR_variant	ENSCAFG00000003902	ENSCAFT00000036428	5426							0/0	63	0/1	99	0/0	87	0/0	54
12	67855850	T	G	517.04	G	REV3L	synonymous_variant	ENSCAFG00000003942	ENSCAFT00000006350	3438	3438	1146	T	acA/acC			./.	12	0/1	99	0/0	99	0/0	51
12	67855850				G	REV3L	synonymous_variant	ENSCAFG00000003942	ENSCAFT00000006343	3427	3204	1068	T	acA/acC
12	71895629	A	G	241.15	G	NT5DC1	synonymous_variant	ENSCAFG00000004060	ENSCAFT00000006504	869	621	207	K	aaA/aaG			0/1	99	0/0	99	0/0	99	0/0	99
12	71908744	C	T	280.15	T	NT5DC1	3_prime_UTR_variant	ENSCAFG00000004060	ENSCAFT00000006504	2577							0/1	99	0/0	99	0/0	99	0/0	99
12	71917672	G	A	8723.52	A	TSPYL4	synonymous_variant	ENSCAFG00000023770	ENSCAFT00000036758	735	735	245	H	caC/caT			0/1	99	1/1	99	0/0	99	0/0	99
12	72022129	G	A	56.27	A	C6orf70	missense_variant	ENSCAFG00000004084	ENSCAFT00000006543	1811	1811	604	G/E	gGa/gAa		tolerated(0.92)	0/0	15	0/1	59	./.	3	0/1	32
12	72022129				A	PHF10	intron_variant	ENSCAFG00000004071	ENSCAFT00000006531
12	72026081	C	T	451.84	T	C6orf70	3_prime_UTR_variant	ENSCAFG00000004084	ENSCAFT00000006543	4600							0/1	99	0/1	99	0/0	45	0/0	36
12	72026081				T	PHF10	intron_variant	ENSCAFG00000004071	ENSCAFT00000006531
12	72266736	G	A	471.16	A	DLL1	synonymous_variant	ENSCAFG00000004094	ENSCAFT00000006563	1263	1263	421	D	gaC/gaT			0/0	57	0/0	30	0/1	99	0/0	21
12	72268109	C	T	564.16	T	DLL1	missense_variant	ENSCAFG00000004094	ENSCAFT00000006563	874	874	292	E/K	Gag/Aag		tolerated(0.05)	0/0	39	0/0	45	0/1	99	0/0	24
12	72377511	G	A	501.54	A	FAM120B	3_prime_UTR_variant	ENSCAFG00000004109	ENSCAFT00000006583	3401							0/1	99	0/1	99	0/1	99	0/0	84
13	491629	A	G	126.4	G	NIPAL2	5_prime_UTR_variant	ENSCAFG00000000480	ENSCAFT00000039314	86							0/1	50	./.	6	0/1	29	0/1	36
13	491651	T	G	150.05	G	NIPAL2	5_prime_UTR_variant	ENSCAFG00000000480	ENSCAFT00000039314	64							./.	3	./.	3	0/1	30	0/1	35
13	1655541	T	C	399.16	C	VPS13B	synonymous_variant	ENSCAFG00000000507	ENSCAFT00000043554	6026	5997	1999	I	atT/atC			0/0	21	0/0	99	0/0	99	0/1	99
13	1655541				C	VPS13B	synonymous_variant	ENSCAFG00000000507	ENSCAFT00000000811	6072	6072	2024	I	atT/atC
13	1826628	G	T	142.15	T	VPS13B	missense_variant	ENSCAFG00000000507	ENSCAFT00000043554	11316	11287	3763	A/S	Gcc/Tcc		tolerated(0.06)	0/1	99	0/0	99	0/0	99	0/0	99
13	1826628				T	VPS13B	missense_variant	ENSCAFG00000000507	ENSCAFT00000000811	11362	11362	3788	A/S	Gcc/Tcc		tolerated(0.06)
13	2125768	T	C	4637.15	C		synonymous_variant	ENSCAFG00000000548	ENSCAFT00000000849	1239	1239	413	A	gcT/gcC			0/0	99	0/1	99	0/0	99	0/0	99
13	2143787	C	T	4257.15	T	RNF19A	missense_variant	ENSCAFG00000000555	ENSCAFT00000000860	2612	2350	784	A/T	Gct/Act		deleterious(0.05)	0/0	99	0/0	99	0/0	99	0/1	99
13	2382523	G	A	159.63	A	ANKRD46	3_prime_UTR_variant	ENSCAFG00000028923	ENSCAFT00000048779	4114							./.	9	0/0	30	0/0	15	0/1	85
[truncated: 2,035 more rows]
